# Supplementary material for: Single-cell RNAseq reveals seven classes of colonic sensory neuron
Source: PubMed Central journal article supplement (PMC6580772; doi:10.1136/gutjnl-2017-315631), 2018-02-26

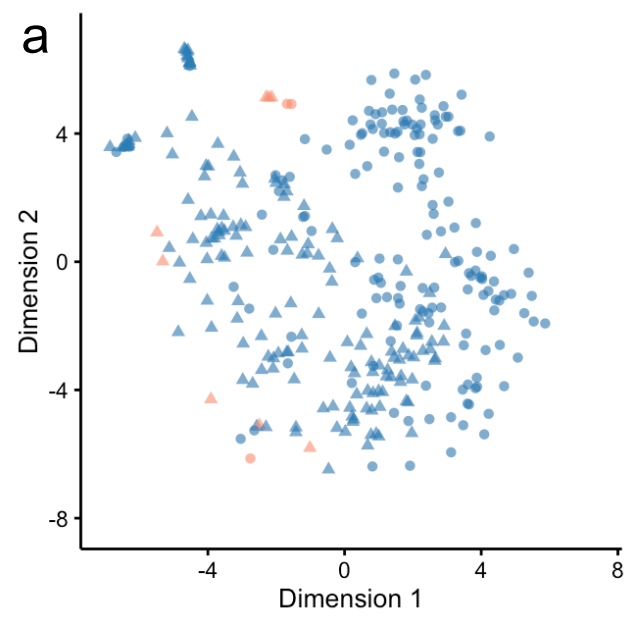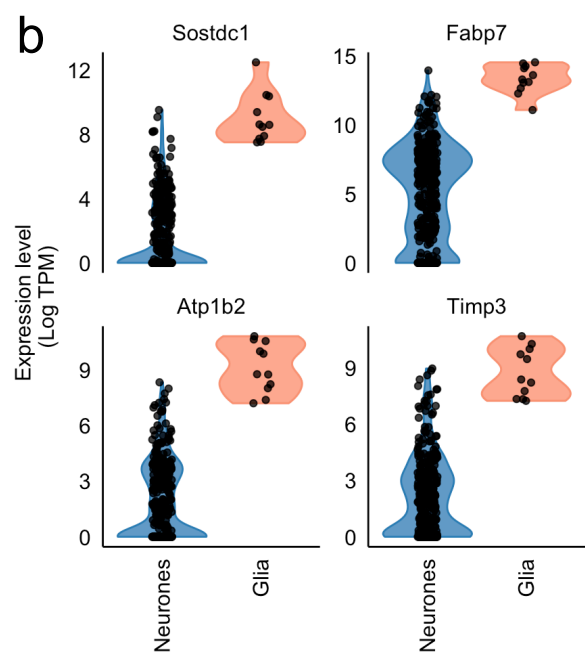

Supplement: gutjnl-2017-315631supp003.pdf [file gutjnl-2017-315631supp003.pdf]
