# Supplementary material for: Single-cell RNAseq reveals seven classes of colonic sensory neuron
Source: PubMed Central journal article supplement (PMC6580772; doi:10.1136/gutjnl-2017-315631), 2018-02-26
Supplement: gutjnl-2017-315631supp006.pdf [file gutjnl-2017-315631supp006.pdf]

## 1 Table S1

2

3 List of 1887 marker genes (ENSEMBL and Symbol) selectively expressed within specific clusters as  
4 determined by SC3 analysis (AUROC  $\leq$  0.6 and  $P < 0.01$ ).

5

| Cluster | ENSEMBL            | Symbol    | AUROC       | p.value  |
|---------|--------------------|-----------|-------------|----------|
| mPEPb   | ENSMUSG00000032769 | Trpa1     | 0.92985474  | 4.83E-30 |
| mPEPb   | ENSMUSG00000039954 | Stk32a    | 0.91057435  | 3.58E-27 |
| mPEPb   | ENSMUSG00000029420 | Rimbp2    | 0.902331804 | 5.08E-26 |
| mPEPb   | ENSMUSG00000033717 | Adra2a    | 0.900086009 | 8.86E-26 |
| mPEPb   | ENSMUSG00000047415 | Gpr68     | 0.89012328  | 2.09E-24 |
| mPEPb   | ENSMUSG00000027004 | Frzb      | 0.885440558 | 1.07E-23 |
| mPEPb   | ENSMUSG00000031492 | Chrn3     | 0.877006881 | 1.42E-22 |
| mPEPb   | ENSMUSG00000060429 | Sntb1     | 0.873399274 | 4.01E-22 |
| mPEPb   | ENSMUSG00000046321 | Hs3st2    | 0.872276376 | 5.67E-22 |
| mPEPb   | ENSMUSG00000031738 | Irx6      | 0.862791476 | 7.28E-21 |
| mPEPb   | ENSMUSG00000015843 | Rxrg      | 0.860784595 | 1.85E-20 |
| mPEPb   | ENSMUSG00000024366 | Gfra3     | 0.860617355 | 1.73E-20 |
| mPEPb   | ENSMUSG00000062210 | Tnfaip8   | 0.860426223 | 1.97E-20 |
| mPEPb   | ENSMUSG00000042846 | Lrrtm3    | 0.860354549 | 2.02E-20 |
| mPEPb   | ENSMUSG00000067438 | Hmx1      | 0.857224771 | 4.22E-20 |
| mPEPb   | ENSMUSG00000019775 | Rgs17     | 0.85588685  | 7.64E-20 |
| mPEPb   | ENSMUSG00000063626 | Unc5d     | 0.85106078  | 2.35E-19 |
| mPEPb   | ENSMUSG00000036528 | Ppfibp2   | 0.846593081 | 1.04E-18 |
| mPEPb   | ENSMUSG00000021032 | Ngb       | 0.841958142 | 3.79E-18 |
| mPEPb   | ENSMUSG00000026271 | Gpr35     | 0.840142393 | 6.23E-18 |
| mPEPb   | ENSMUSG00000028359 | Orm3      | 0.839330084 | 6.09E-18 |
| mPEPb   | ENSMUSG00000074345 | Tnfaip8l3 | 0.838063838 | 8.84E-18 |
| mPEPb   | ENSMUSG00000021614 | Vcan      | 0.83627198  | 1.60E-17 |
| mPEPb   | ENSMUSG00000018339 | Gpx3      | 0.835626911 | 2.14E-17 |
| mPEPb   | ENSMUSG00000085931 | NA        | 0.835053517 | 1.94E-17 |
| mPEPb   | ENSMUSG00000103346 | NA        | 0.834527905 | 2.25E-17 |
| mPEPb   | ENSMUSG00000016758 | Bik       | 0.834097859 | 2.52E-17 |
| mPEPb   | ENSMUSG00000067081 | Asb18     | 0.833500573 | 3.50E-17 |
| mPEPb   | ENSMUSG00000024907 | Gal       | 0.831899847 | 5.79E-17 |
| mPEPb   | ENSMUSG00000020520 | Galnt10   | 0.831708716 | 6.13E-17 |
| mPEPb   | ENSMUSG00000035528 | Npffr2    | 0.827408257 | 1.18E-16 |
| mPEPb   | ENSMUSG00000016024 | Lbp       | 0.825903096 | 1.66E-16 |
| mPEPb   | ENSMUSG00000046834 | Krt1      | 0.825879205 | 2.29E-16 |
| mPEPb   | ENSMUSG00000034336 | Ina       | 0.825019113 | 3.57E-16 |
| mPEPb   | ENSMUSG00000034981 | Parm1     | 0.823060015 | 6.01E-16 |
| mPEPb   | ENSMUSG00000048218 | Amigo2    | 0.820766437 | 1.09E-15 |

|       |                    |               |             |          |
|-------|--------------------|---------------|-------------|----------|
| mPEPb | ENSMUSG00000031364 | Grpr          | 0.820694763 | 9.37E-16 |
| mPEPb | ENSMUSG00000027584 | Oprl1         | 0.819046254 | 1.60E-15 |
| mPEPb | ENSMUSG00000019876 | Pkib          | 0.817708333 | 2.39E-15 |
| mPEPb | ENSMUSG00000039286 | Fndc3b        | 0.817564985 | 2.47E-15 |
| mPEPb | ENSMUSG00000032564 | Cpne4         | 0.817445528 | 2.56E-15 |
| mPEPb | ENSMUSG00000032776 | Mctp2         | 0.816035933 | 3.48E-15 |
| mPEPb | ENSMUSG00000047904 | Sstr2         | 0.814650229 | 4.36E-15 |
| mPEPb | ENSMUSG00000036502 | Tmem255a      | 0.814459098 | 5.45E-15 |
| mPEPb | ENSMUSG00000015829 | Tnr           | 0.813814029 | 6.00E-15 |
| mPEPb | ENSMUSG00000054976 | Nyap2         | 0.813527332 | 6.18E-15 |
| mPEPb | ENSMUSG00000004626 | Stxbp2        | 0.812476109 | 8.29E-15 |
| mPEPb | ENSMUSG00000024937 | Ehbp111       | 0.811377102 | 1.19E-14 |
| mPEPb | ENSMUSG00000022179 | 4931414P19Rik | 0.811233754 | 1.13E-14 |
| mPEPb | ENSMUSG00000074607 | Tox2          | 0.810708142 | 1.39E-14 |
| mPEPb | ENSMUSG00000066189 | Cacng3        | 0.810325879 | 1.35E-14 |
| mPEPb | ENSMUSG00000070552 | Mrgprx1       | 0.809871942 | 1.25E-14 |
| mPEPb | ENSMUSG00000040990 | Sh3kbp1       | 0.809728593 | 1.80E-14 |
| mPEPb | ENSMUSG00000052981 | Ube2ql1       | 0.807578364 | 3.07E-14 |
| mPEPb | ENSMUSG00000037624 | Kcnk2         | 0.80733945  | 3.21E-14 |
| mPEPb | ENSMUSG00000076612 | NA            | 0.807172209 | 2.97E-14 |
| mPEPb | ENSMUSG00000022945 | Chaf1b        | 0.806622706 | 3.45E-14 |
| mPEPb | ENSMUSG00000100850 | NA            | 0.806240443 | 2.43E-14 |
| mPEPb | ENSMUSG00000078670 | Fam174b       | 0.805643157 | 4.95E-14 |
| mPEPb | ENSMUSG00000036111 | Lmo1          | 0.804759174 | 5.95E-14 |
| mPEPb | ENSMUSG00000075325 | Gm13582       | 0.8046875   | 5.36E-14 |
| mPEPb | ENSMUSG00000037610 | Kcnmb2        | 0.804329128 | 6.63E-14 |
| mPEPb | ENSMUSG00000032437 | Stt3b         | 0.803588494 | 8.20E-14 |
| mPEPb | ENSMUSG00000050875 | A730017C20Rik | 0.802250573 | 1.14E-13 |
| mPEPb | ENSMUSG00000028152 | Tspan5        | 0.79986143  | 2.03E-13 |
| mPEPb | ENSMUSG00000041479 | Syt15         | 0.799311927 | 1.72E-13 |
| mPEPb | ENSMUSG00000019139 | Isyna1        | 0.798642966 | 2.72E-13 |
| mPEPb | ENSMUSG00000037681 | Esyt3         | 0.798069572 | 2.70E-13 |
| mPEPb | ENSMUSG00000060735 | Rxfp3         | 0.793697439 | 6.33E-13 |
| mPEPb | ENSMUSG00000068762 | Gstm6         | 0.793601873 | 8.75E-13 |
| mPEPb | ENSMUSG00000032849 | Abcc4         | 0.792980696 | 1.05E-12 |
| mPEPb | ENSMUSG00000039364 | Sectm1b       | 0.792096713 | 1.19E-12 |
| mPEPb | ENSMUSG00000064294 | Aox3          | 0.790734901 | 1.30E-12 |
| mPEPb | ENSMUSG00000025888 | Casp1         | 0.790304855 | 1.77E-12 |
| mPEPb | ENSMUSG00000026688 | Mgst3         | 0.789612003 | 2.32E-12 |
| mPEPb | ENSMUSG00000047787 | Flrt1         | 0.788584671 | 2.86E-12 |
| mPEPb | ENSMUSG00000039629 | Strip2        | 0.78789182  | 3.42E-12 |
| mPEPb | ENSMUSG00000003559 | As3mt         | 0.786840596 | 4.42E-12 |
| mPEPb | ENSMUSG00000087196 | NA            | 0.785598242 | 5.31E-12 |

|       |                    |           |             |          |
|-------|--------------------|-----------|-------------|----------|
| mPEPb | ENSMUSG00000028713 | Cyp4b1    | 0.78557435  | 4.52E-12 |
| mPEPb | ENSMUSG00000022587 | Ly6e      | 0.784857607 | 6.87E-12 |
| mPEPb | ENSMUSG00000020844 | Nxn       | 0.784762041 | 7.13E-12 |
| mPEPb | ENSMUSG00000038248 | Sobp      | 0.78457091  | 7.46E-12 |
| mPEPb | ENSMUSG00000026389 | Steap3    | 0.784523127 | 7.54E-12 |
| mPEPb | ENSMUSG00000032038 | St3gal4   | 0.78423643  | 8.00E-12 |
| mPEPb | ENSMUSG00000053930 | Shisa6    | 0.783830275 | 7.08E-12 |
| mPEPb | ENSMUSG00000082193 | NA        | 0.783686927 | 7.93E-12 |
| mPEPb | ENSMUSG00000051515 | NA        | 0.78158448  | 1.05E-11 |
| mPEPb | ENSMUSG00000020098 | Pcbd1     | 0.781536697 | 1.49E-11 |
| mPEPb | ENSMUSG00000097796 | Gm16702   | 0.780939411 | 1.69E-11 |
| mPEPb | ENSMUSG00000009214 | Tmem8c    | 0.780198777 | 1.60E-11 |
| mPEPb | ENSMUSG00000031491 | Chrna6    | 0.779505925 | 2.35E-11 |
| mPEPb | ENSMUSG00000005124 | Wisp1     | 0.779028096 | 2.54E-11 |
| mPEPb | ENSMUSG00000002012 | Pnck      | 0.77859805  | 2.90E-11 |
| mPEPb | ENSMUSG00000051980 | Casr      | 0.777905199 | 3.18E-11 |
| mPEPb | ENSMUSG00000036856 | Wnt4      | 0.777690176 | 3.27E-11 |
| mPEPb | ENSMUSG00000026301 | Iqca      | 0.777499044 | 2.49E-11 |
| mPEPb | ENSMUSG00000031841 | Cdh13     | 0.777475153 | 3.68E-11 |
| mPEPb | ENSMUSG00000051359 | Ncald     | 0.776877867 | 4.27E-11 |
| mPEPb | ENSMUSG00000071234 | Syndig1l  | 0.775922209 | 5.07E-11 |
| mPEPb | ENSMUSG00000029361 | Nos1      | 0.775516055 | 5.78E-11 |
| mPEPb | ENSMUSG00000037492 | Zmat4     | 0.775396598 | 5.84E-11 |
| mPEPb | ENSMUSG00000037031 | Tspan15   | 0.774823203 | 6.73E-11 |
| mPEPb | ENSMUSG00000069855 | Slc47a2   | 0.772816323 | 1.00E-10 |
| mPEPb | ENSMUSG00000085915 | NA        | 0.772792431 | 9.33E-11 |
| mPEPb | ENSMUSG00000069072 | Slc7a14   | 0.772696865 | 1.08E-10 |
| mPEPb | ENSMUSG00000084973 | Gm13848   | 0.771287271 | 1.25E-10 |
| mPEPb | ENSMUSG00000022235 | Cmb1      | 0.770164373 | 1.88E-10 |
| mPEPb | ENSMUSG00000074749 | Kiz       | 0.770140482 | 1.89E-10 |
| mPEPb | ENSMUSG00000039007 | Cpq       | 0.769017584 | 2.41E-10 |
| mPEPb | ENSMUSG00000023367 | Tmem176a  | 0.768706995 | 2.58E-10 |
| mPEPb | ENSMUSG00000022856 | Tmem41a   | 0.768348624 | 2.79E-10 |
| mPEPb | ENSMUSG00000031488 | Rab11fip1 | 0.767297401 | 3.01E-10 |
| mPEPb | ENSMUSG00000058159 | NA        | 0.767058486 | 3.17E-10 |
| mPEPb | ENSMUSG00000010066 | Cacna2d2  | 0.76679568  | 3.88E-10 |
| mPEPb | ENSMUSG00000032109 | Nlr1      | 0.7664612   | 4.01E-10 |
| mPEPb | ENSMUSG00000084126 | NA        | 0.765744457 | 3.55E-10 |
| mPEPb | ENSMUSG00000006219 | Fblim1    | 0.765266628 | 4.99E-10 |
| mPEPb | ENSMUSG00000016757 | Ttll12    | 0.764263188 | 6.73E-10 |
| mPEPb | ENSMUSG00000048644 | Ctxn1     | 0.763044725 | 8.73E-10 |
| mPEPb | ENSMUSG00000070867 | Trabd2b   | 0.762996942 | 6.89E-10 |
| mPEPb | ENSMUSG00000040183 | Ankrd6    | 0.76180237  | 1.14E-09 |

|       |                    |               |             |          |
|-------|--------------------|---------------|-------------|----------|
| mPEPb | ENSMUSG00000021541 | Trpc7         | 0.761539564 | 1.04E-09 |
| mPEPb | ENSMUSG00000000125 | Wnt3          | 0.761372324 | 1.07E-09 |
| mPEPb | ENSMUSG00000028100 | Nudt17        | 0.761276758 | 1.26E-09 |
| mPEPb | ENSMUSG00000086843 | E030013119Rik | 0.760727255 | 7.26E-10 |
| mPEPb | ENSMUSG00000031932 | Gpr83         | 0.760583907 | 1.22E-09 |
| mPEPb | ENSMUSG00000086804 | NA            | 0.760129969 | 1.45E-09 |
| mPEPb | ENSMUSG00000022773 | Ypel1         | 0.759938838 | 1.67E-09 |
| mPEPb | ENSMUSG00000043441 | Gpr149        | 0.759891055 | 1.65E-09 |
| mPEPb | ENSMUSG00000024664 | Fads3         | 0.759508792 | 1.84E-09 |
| mPEPb | ENSMUSG00000043068 | Fam89a        | 0.759461009 | 1.86E-09 |
| mPEPb | ENSMUSG00000015396 | Cd83          | 0.758529243 | 1.84E-09 |
| mPEPb | ENSMUSG00000002265 | Peg3          | 0.758457569 | 2.29E-09 |
| mPEPb | ENSMUSG00000031119 | Gpc4          | 0.757931957 | 2.12E-09 |
| mPEPb | ENSMUSG00000029153 | Ociad2        | 0.757669151 | 2.64E-09 |
| mPEPb | ENSMUSG00000023945 | Slc5a7        | 0.75680906  | 3.08E-09 |
| mPEPb | ENSMUSG00000041708 | Mpped1        | 0.756785168 | 3.20E-09 |
| mPEPb | ENSMUSG00000013846 | St3gal1       | 0.756092317 | 3.55E-09 |
| mPEPb | ENSMUSG00000028194 | Ddah1         | 0.755925076 | 3.88E-09 |
| mPEPb | ENSMUSG00000041654 | Slc39a11      | 0.755733945 | 4.04E-09 |
| mPEPb | ENSMUSG00000074782 | 4833422C13Rik | 0.755662271 | 4.04E-09 |
| mPEPb | ENSMUSG00000073535 | NA            | 0.755064985 | 3.16E-09 |
| mPEPb | ENSMUSG00000006930 | Hap1          | 0.754372133 | 5.32E-09 |
| mPEPb | ENSMUSG00000044288 | Cnr1          | 0.754348242 | 5.37E-09 |
| mPEPb | ENSMUSG00000004035 | Gstm7         | 0.754348242 | 5.33E-09 |
| mPEPb | ENSMUSG00000034773 | BC030867      | 0.75415711  | 5.49E-09 |
| mPEPb | ENSMUSG00000028661 | Epha8         | 0.753344801 | 5.00E-09 |
| mPEPb | ENSMUSG00000025468 | Caly          | 0.753129778 | 6.90E-09 |
| mPEPb | ENSMUSG00000029321 | Slc10a6       | 0.753034213 | 6.96E-09 |
| mPEPb | ENSMUSG00000021803 | Cdhr1         | 0.750597286 | 1.15E-08 |
| mPEPb | ENSMUSG00000085953 | NA            | 0.749522171 | 1.40E-08 |
| mPEPb | ENSMUSG00000015709 | Arnt2         | 0.749307148 | 1.50E-08 |
| mPEPb | ENSMUSG00000043635 | Adamts3       | 0.749020451 | 1.32E-08 |
| mPEPb | ENSMUSG00000021534 | 1700001L19Rik | 0.748327599 | 1.82E-08 |
| mPEPb | ENSMUSG00000039956 | Mrap          | 0.748040902 | 1.71E-08 |
| mPEPb | ENSMUSG00000024873 | Cnih2         | 0.747371942 | 2.22E-08 |
| mPEPb | ENSMUSG00000028064 | Sema4a        | 0.747061353 | 2.29E-08 |
| mPEPb | ENSMUSG00000030666 | Calcb         | 0.746798547 | 2.49E-08 |
| mPEPb | ENSMUSG00000032265 | Fam46a        | 0.746487959 | 2.63E-08 |
| mPEPb | ENSMUSG00000026360 | Rgs2          | 0.746296827 | 2.74E-08 |
| mPEPb | ENSMUSG00000028871 | Rspo1         | 0.745580084 | 2.89E-08 |
| mPEPb | ENSMUSG00000074006 | Omp           | 0.745221713 | 3.21E-08 |
| mPEPb | ENSMUSG00000026976 | Pax8          | 0.744719992 | 3.55E-08 |
| mPEPb | ENSMUSG00000026170 | Cyp27a1       | 0.744385512 | 2.97E-08 |

|       |                    |               |             |          |
|-------|--------------------|---------------|-------------|----------|
| mPEPb | ENSMUSG00000026463 | Atp2b4        | 0.744313838 | 4.06E-08 |
| mPEPb | ENSMUSG00000045216 | Hs6st1        | 0.743979358 | 4.36E-08 |
| mPEPb | ENSMUSG00000028517 | Plpp3         | 0.743597095 | 4.68E-08 |
| mPEPb | ENSMUSG00000032297 | Celf6         | 0.743167049 | 5.09E-08 |
| mPEPb | ENSMUSG00000037362 | Nov           | 0.741972477 | 5.51E-08 |
| mPEPb | ENSMUSG00000078235 | Fam43b        | 0.740969037 | 7.87E-08 |
| mPEPb | ENSMUSG00000092392 | NA            | 0.740515099 | 7.45E-08 |
| mPEPb | ENSMUSG00000026090 | 2010300C02Rik | 0.740491208 | 8.31E-08 |
| mPEPb | ENSMUSG00000000766 | Oprm1         | 0.740228402 | 9.04E-08 |
| mPEPb | ENSMUSG00000094910 | D430019H16Rik | 0.739272745 | 1.09E-07 |
| mPEPb | ENSMUSG00000050071 | Bex1          | 0.737456995 | 1.55E-07 |
| mPEPb | ENSMUSG00000021340 | Gpld1         | 0.736955275 | 1.71E-07 |
| mPEPb | ENSMUSG00000030102 | Itpr1         | 0.736788035 | 1.72E-07 |
| mPEPb | ENSMUSG00000010663 | Fads1         | 0.736764144 | 1.78E-07 |
| mPEPb | ENSMUSG00000020846 | Fam101b       | 0.735474006 | 2.27E-07 |
| mPEPb | ENSMUSG00000029832 | Nfe2l3        | 0.73537844  | 2.03E-07 |
| mPEPb | ENSMUSG00000025743 | Sdc3          | 0.735258983 | 2.37E-07 |
| mPEPb | ENSMUSG00000039166 | Akap7         | 0.734470566 | 2.75E-07 |
| mPEPb | ENSMUSG00000042115 | Klhdc8a       | 0.732965405 | 3.66E-07 |
| mPEPb | ENSMUSG00000106603 | NA            | 0.732272554 | 3.97E-07 |
| mPEPb | ENSMUSG00000085981 | NA            | 0.732200879 | 3.20E-07 |
| mPEPb | ENSMUSG00000038668 | Lpar1         | 0.732033639 | 4.34E-07 |
| mPEPb | ENSMUSG00000028347 | Tmeff1        | 0.731460245 | 4.83E-07 |
| mPEPb | ENSMUSG00000056394 | Lig1          | 0.731006307 | 5.28E-07 |
| mPEPb | ENSMUSG00000019846 | Lama4         | 0.731006307 | 5.23E-07 |
| mPEPb | ENSMUSG00000023439 | Gnb3          | 0.730862959 | 5.07E-07 |
| mPEPb | ENSMUSG00000042761 | Mrap2         | 0.729763953 | 6.63E-07 |
| mPEPb | ENSMUSG00000026773 | Pfkfb3        | 0.729525038 | 6.96E-07 |
| mPEPb | ENSMUSG00000024268 | Celf4         | 0.729501147 | 6.99E-07 |
| mPEPb | ENSMUSG00000019359 | Gdpd2         | 0.728664946 | 7.53E-07 |
| mPEPb | ENSMUSG00000087131 | NA            | 0.728091552 | 8.90E-07 |
| mPEPb | ENSMUSG00000021451 | Sema4d        | 0.727446483 | 1.02E-06 |
| mPEPb | ENSMUSG00000016503 | Gtf3a         | 0.726036888 | 1.32E-06 |
| mPEPb | ENSMUSG00000074071 | Fam169b       | 0.725487385 | 1.34E-06 |
| mPEPb | ENSMUSG00000076431 | Sox4          | 0.724842317 | 1.64E-06 |
| mPEPb | ENSMUSG00000055409 | Nell1         | 0.724794534 | 1.29E-06 |
| mPEPb | ENSMUSG00000061911 | Myt1l         | 0.724340596 | 1.80E-06 |
| mPEPb | ENSMUSG00000048058 | Ldlrad3       | 0.724197248 | 1.82E-06 |
| mPEPb | ENSMUSG00000049744 | Arhgap15      | 0.724125573 | 1.87E-06 |
| mPEPb | ENSMUSG00000022240 | Ctnnd2        | 0.723886659 | 1.96E-06 |
| mPEPb | ENSMUSG00000029477 | Morn3         | 0.723169916 | 1.84E-06 |
| mPEPb | ENSMUSG00000020646 | Mboat2        | 0.722859327 | 2.33E-06 |
| mPEPb | ENSMUSG00000075012 | Fjx1          | 0.722715979 | 1.83E-06 |

|       |                    |               |             |          |
|-------|--------------------|---------------|-------------|----------|
| mPEPb | ENSMUSG00000018819 | Lsp1          | 0.722333716 | 2.37E-06 |
| mPEPb | ENSMUSG00000017144 | Rnd3          | 0.722094801 | 2.70E-06 |
| mPEPb | ENSMUSG00000045246 | Kcng4         | 0.721354167 | 2.28E-06 |
| mPEPb | ENSMUSG00000054196 | Cthrc1        | 0.720995795 | 3.18E-06 |
| mPEPb | ENSMUSG00000060002 | Chpt1         | 0.720971904 | 3.30E-06 |
| mPEPb | ENSMUSG00000028370 | Pappa         | 0.720661315 | 3.32E-06 |
| mPEPb | ENSMUSG00000028173 | Wls           | 0.720541858 | 3.57E-06 |
| mPEPb | ENSMUSG00000039046 | Usp6nl        | 0.720279052 | 3.74E-06 |
| mPEPb | ENSMUSG00000035681 | Kcnc2         | 0.720231269 | 3.77E-06 |
| mPEPb | ENSMUSG00000004110 | Cacna1e       | 0.720207378 | 3.75E-06 |
| mPEPb | ENSMUSG00000062561 | NA            | 0.71992068  | 2.82E-06 |
| mPEPb | ENSMUSG00000039963 | Ccdc40        | 0.719395069 | 4.37E-06 |
| mPEPb | ENSMUSG00000097094 | NA            | 0.719180046 | 3.57E-06 |
| mPEPb | ENSMUSG00000069792 | Wfdc17        | 0.719108372 | 4.00E-06 |
| mPEPb | ENSMUSG00000021319 | Sfrp4         | 0.718988914 | 4.63E-06 |
| mPEPb | ENSMUSG00000029352 | Crybb3        | 0.717770451 | 5.49E-06 |
| mPEPb | ENSMUSG00000095079 | NA            | 0.717149274 | 5.05E-06 |
| mPEPb | ENSMUSG00000022876 | Samsn1        | 0.716862576 | 6.82E-06 |
| mPEPb | ENSMUSG00000032890 | Rims3         | 0.716265291 | 7.59E-06 |
| mPEPb | ENSMUSG00000019851 | Perp          | 0.715978593 | 7.96E-06 |
| mPEPb | ENSMUSG00000086152 | NA            | 0.715309633 | 6.40E-06 |
| mPEPb | ENSMUSG00000090061 | Nwd2          | 0.714473433 | 1.04E-05 |
| mPEPb | ENSMUSG00000007613 | Tgfb1         | 0.714282301 | 1.06E-05 |
| mPEPb | ENSMUSG00000020793 | Galr2         | 0.713995604 | 8.47E-06 |
| mPEPb | ENSMUSG00000020644 | Id2           | 0.713732798 | 1.18E-05 |
| mPEPb | ENSMUSG00000009687 | Fxyd5         | 0.712227638 | 1.51E-05 |
| mPEPb | ENSMUSG00000029095 | Ablim2        | 0.71210818  | 1.56E-05 |
| mPEPb | ENSMUSG00000044345 | Marveld1      | 0.712084289 | 1.55E-05 |
| mPEPb | ENSMUSG00000025175 | Fn3k          | 0.711869266 | 1.62E-05 |
| mPEPb | ENSMUSG00000034591 | Slc41a2       | 0.711821483 | 1.64E-05 |
| mPEPb | ENSMUSG00000091430 | NA            | 0.7117737   | 1.36E-05 |
| mPEPb | ENSMUSG00000066235 | Pomgnt2       | 0.711702026 | 1.67E-05 |
| mPEPb | ENSMUSG00000006800 | Sulf2         | 0.711654243 | 1.55E-05 |
| mPEPb | ENSMUSG00000001988 | Npas1         | 0.711654243 | 1.59E-05 |
| mPEPb | ENSMUSG00000020703 | 5530401A14Rik | 0.710841934 | 1.53E-05 |
| mPEPb | ENSMUSG00000020023 | Tmcc3         | 0.710340214 | 2.11E-05 |
| mPEPb | ENSMUSG00000032491 | Nradd         | 0.710172974 | 2.10E-05 |
| mPEPb | ENSMUSG00000029090 | Adgra3        | 0.710125191 | 2.15E-05 |
| mPEPb | ENSMUSG00000013653 | 1810065E05Rik | 0.709957951 | 1.80E-05 |
| mPEPb | ENSMUSG00000003341 | Atp8b3        | 0.709480122 | 2.30E-05 |
| mPEPb | ENSMUSG00000005705 | Agrp          | 0.709384557 | 2.35E-05 |
| mPEPb | ENSMUSG00000051107 | NA            | 0.708405008 | 2.92E-05 |
| mPEPb | ENSMUSG00000103538 | NA            | 0.708142202 | 1.95E-05 |

|       |                    |               |             |             |
|-------|--------------------|---------------|-------------|-------------|
| mPEPb | ENSMUSG00000016763 | Scube1        | 0.708142202 | 2.79E-05    |
| mPEPb | ENSMUSG00000066877 | Nck2          | 0.707353784 | 3.38E-05    |
| mPEPb | ENSMUSG00000086885 | NA            | 0.707258219 | 2.79E-05    |
| mPEPb | ENSMUSG00000051166 | Eml5          | 0.707067087 | 3.66E-05    |
| mPEPb | ENSMUSG00000079564 | NA            | 0.70594419  | 3.72E-05    |
| mPEPb | ENSMUSG00000026321 | Tnfrsf11a     | 0.705920298 | 4.38E-05    |
| mPEPb | ENSMUSG00000022421 | Nptxr         | 0.703937309 | 6.18E-05    |
| mPEPb | ENSMUSG00000022261 | Sdc2          | 0.703865635 | 6.24E-05    |
| mPEPb | ENSMUSG00000071724 | Smpd5         | 0.703722286 | 6.09E-05    |
| mPEPb | ENSMUSG00000025986 | Slc39a10      | 0.703674503 | 6.44E-05    |
| mPEPb | ENSMUSG00000035200 | Chrn4         | 0.703650612 | 6.42E-05    |
| mPEPb | ENSMUSG00000022840 | Adcy5         | 0.703507263 | 6.60E-05    |
| mPEPb | ENSMUSG00000021621 | Zcchc9        | 0.70262328  | 7.66E-05    |
| mPEPb | ENSMUSG00000031972 | Acta1         | 0.701930428 | 8.55E-05    |
| mPEPb | ENSMUSG00000015222 | Map2          | 0.701452599 | 9.28E-05    |
| mPEPb | ENSMUSG00000053214 | Gm9899        | 0.701046445 | 9.61E-05    |
| mPEPb | ENSMUSG00000066800 | Rnasel        | 0.699995222 | 0.000117543 |
| mPEPb | ENSMUSG00000033585 | Ndn           | 0.698681193 | 0.000145425 |
| mPEPb | ENSMUSG00000020176 | Grb10         | 0.698107798 | 0.000159195 |
| mPEPb | ENSMUSG00000000223 | Drp2          | 0.697868884 | 0.000164889 |
| mPEPb | ENSMUSG00000025551 | Fgf14         | 0.697749427 | 0.000139216 |
| mPEPb | ENSMUSG00000017721 | Pigt          | 0.697653861 | 0.000171181 |
| mPEPb | ENSMUSG00000031842 | Pde4c         | 0.697438838 | 0.000171185 |
| mPEPb | ENSMUSG00000072553 | Gm525         | 0.697271598 | 0.000144767 |
| mPEPb | ENSMUSG00000033256 | Shf           | 0.696913226 | 0.000191924 |
| mPEPb | ENSMUSG00000041992 | Rapgef5       | 0.696865443 | 0.000191086 |
| mPEPb | ENSMUSG00000042816 | Gpr151        | 0.696865443 | 0.00018371  |
| mPEPb | ENSMUSG00000027276 | Jag1          | 0.696793769 | 0.000194904 |
| mPEPb | ENSMUSG00000070817 | Vmn1r85       | 0.696793769 | 0.000131014 |
| mPEPb | ENSMUSG00000087074 | NA            | 0.695933677 | 0.000176542 |
| mPEPb | ENSMUSG00000031838 | Ifi30         | 0.695193043 | 0.000252734 |
| mPEPb | ENSMUSG00000040536 | Necab1        | 0.695073586 | 0.000258528 |
| mPEPb | ENSMUSG00000021185 | 9030617O03Rik | 0.69497802  | 0.000261741 |
| mPEPb | ENSMUSG00000054863 | Fam19a5       | 0.694739106 | 0.000271777 |
| mPEPb | ENSMUSG00000050830 | Vwc2          | 0.694667431 | 0.000255067 |
| mPEPb | ENSMUSG00000021876 | Rnase4        | 0.6944763   | 0.000282524 |
| mPEPb | ENSMUSG00000037336 | Mfsd2b        | 0.694285168 | 0.000282333 |
| mPEPb | ENSMUSG00000023031 | Cela1         | 0.694165711 | 0.000281965 |
| mPEPb | ENSMUSG00000017733 | Eppin         | 0.693783448 | 0.000245649 |
| mPEPb | ENSMUSG00000046378 | Asphd1        | 0.693018922 | 0.000356119 |
| mPEPb | ENSMUSG00000040133 | Gpr176        | 0.692947248 | 0.000359039 |
| mPEPb | ENSMUSG00000106320 | NA            | 0.69215883  | 0.000383927 |
| mPEPb | ENSMUSG00000052135 | Foxo6         | 0.691083716 | 0.00046228  |

|       |                    |               |             |             |
|-------|--------------------|---------------|-------------|-------------|
| mPEPb | ENSMUSG00000063506 | Arhgap22      | 0.691083716 | 0.000481374 |
| mPEPb | ENSMUSG00000057897 | Camk2b        | 0.691083716 | 0.000481584 |
| mPEPb | ENSMUSG00000030089 | Slc41a3       | 0.691035933 | 0.000484945 |
| mPEPb | ENSMUSG00000021311 | Mtr           | 0.69098815  | 0.000487889 |
| mPEPb | ENSMUSG00000036526 | Card11        | 0.690605887 | 0.00048039  |
| mPEPb | ENSMUSG00000084866 | A930006K02Rik | 0.690366972 | 0.000526517 |
| mPEPb | ENSMUSG00000029119 | Man2b2        | 0.689650229 | 0.000599915 |
| mPEPb | ENSMUSG00000031398 | Plxna3        | 0.689626338 | 0.00060096  |
| mPEPb | ENSMUSG00000103807 | NA            | 0.689626338 | 0.000543383 |
| mPEPb | ENSMUSG00000025026 | Add3          | 0.68867068  | 0.00069614  |
| mPEPb | ENSMUSG00000045008 | 9030612E09Rik | 0.688575115 | 0.000651395 |
| mPEPb | ENSMUSG00000027907 | S100a11       | 0.688025612 | 0.000769434 |
| mPEPb | ENSMUSG00000044337 | Ackr3         | 0.687906154 | 0.000749754 |
| mPEPb | ENSMUSG00000023067 | Cdkn1a        | 0.68783448  | 0.000792619 |
| mPEPb | ENSMUSG00000043556 | Fbxl7         | 0.68766724  | 0.000760037 |
| mPEPb | ENSMUSG00000068082 | Grxcr1        | 0.687547783 | 0.000729622 |
| mPEPb | ENSMUSG00000020326 | Ccng1         | 0.687547783 | 0.000827724 |
| mPEPb | ENSMUSG00000085620 | NA            | 0.687117737 | 0.000670234 |
| mPEPb | ENSMUSG00000046841 | Ckap4         | 0.686926606 | 0.000907803 |
| mPEPb | ENSMUSG00000038459 | Abhd17c       | 0.686568234 | 0.000959244 |
| mPEPb | ENSMUSG00000027408 | Cpxm1         | 0.686544343 | 0.000945125 |
| mPEPb | ENSMUSG00000021070 | Bdkrb2        | 0.686018731 | 0.000969425 |
| mPEPb | ENSMUSG00000024338 | Psmb8         | 0.685779817 | 0.001079984 |
| mPEPb | ENSMUSG00000036777 | Anln          | 0.685660359 | 0.001066011 |
| mPEPb | ENSMUSG00000078238 | NA            | 0.685325879 | 0.001103905 |
| mPEPb | ENSMUSG00000030255 | Sspn          | 0.685301988 | 0.001146999 |
| mPEPb | ENSMUSG00000037138 | Aff3          | 0.685206422 | 0.001177788 |
| mPEPb | ENSMUSG00000011267 | Zfp296        | 0.684728593 | 0.001201097 |
| mPEPb | ENSMUSG00000041141 | Pnmal1        | 0.684418005 | 0.00132276  |
| mPEPb | ENSMUSG00000087366 | Junos         | 0.683629587 | 0.001436126 |
| mPEPb | ENSMUSG00000025742 | Prps2         | 0.683438456 | 0.001532698 |
| mPEPb | ENSMUSG00000040848 | Sft2d2        | 0.682793387 | 0.001679001 |
| mPEPb | ENSMUSG00000042184 | 1700069L16Rik | 0.682267775 | 0.001317467 |
| mPEPb | ENSMUSG00000097440 | NA            | 0.681837729 | 0.001786242 |
| mPEPb | ENSMUSG00000032059 | Alg9          | 0.681574924 | 0.0020151   |
| mPEPb | ENSMUSG00000100975 | NA            | 0.680404243 | 0.002385228 |
| mPEPb | ENSMUSG00000020660 | Pomc          | 0.679711391 | 0.002576414 |
| mPEPb | ENSMUSG00000021180 | Rps6ka5       | 0.679424694 | 0.002758734 |
| mPEPb | ENSMUSG00000005045 | Chd5          | 0.679281346 | 0.002822371 |
| mPEPb | ENSMUSG00000031380 | Figf          | 0.678445145 | 0.003039023 |
| mPEPb | ENSMUSG00000040490 | Lrfr2         | 0.678397362 | 0.003078448 |
| mPEPb | ENSMUSG00000041341 | Atg2b         | 0.678373471 | 0.003215819 |
| mPEPb | ENSMUSG00000021540 | Smad5         | 0.678254014 | 0.003268116 |



|       |                    |          |             |             |
|-------|--------------------|----------|-------------|-------------|
| mPEPb | ENSMUSG00000070047 | Fat1     | 0.678158448 | 0.003124053 |
| mPEPb | ENSMUSG00000026185 | Igfbp5   | 0.678038991 | 0.002996686 |
| mPEPb | ENSMUSG00000022454 | Nell2    | 0.678015099 | 0.003161345 |
| mPEPb | ENSMUSG00000000416 | Cttnbp2  | 0.677346139 | 0.003712486 |
| mPEPb | ENSMUSG00000073295 | Nudt11   | 0.677083333 | 0.003870173 |
| mPEPb | ENSMUSG00000021575 | Ahrr     | 0.676844419 | 0.003846562 |
| mPEPb | ENSMUSG00000072964 | Bhlhb9   | 0.676844419 | 0.004004334 |
| mPEPb | ENSMUSG00000056553 | Ptprn2   | 0.676629396 | 0.004129358 |
| mPEPb | ENSMUSG00000027230 | Creb3l1  | 0.67603211  | 0.004495115 |
| mPEPb | ENSMUSG00000078496 | Gm13152  | 0.675578173 | 0.004787567 |
| mPEPb | ENSMUSG00000020423 | Btg2     | 0.67486143  | 0.005311598 |
| mPEPb | ENSMUSG00000053552 | Ebf4     | 0.674765864 | 0.005363361 |
| mPEPb | ENSMUSG00000039154 | Shd      | 0.674598624 | 0.005510392 |
| mPEPb | ENSMUSG00000104168 | NA       | 0.674096904 | 0.005822612 |
| mPEPb | ENSMUSG00000034987 | Hrh2     | 0.673857989 | 0.005324227 |
| mPEPb | ENSMUSG00000053799 | Exoc6    | 0.673762424 | 0.006207224 |
| mPEPb | ENSMUSG00000057346 | Apol9a   | 0.672782875 | 0.006385733 |
| mPEPb | ENSMUSG00000039137 | Whrn     | 0.6727112   | 0.006440478 |
| mPEPb | ENSMUSG00000074922 | Fam122a  | 0.672424503 | 0.00749269  |
| mPEPb | ENSMUSG00000005125 | Ndrp1    | 0.671922783 | 0.007983445 |
| mPEPb | ENSMUSG00000044847 | Lsm11    | 0.671492737 | 0.008502687 |
| mPEPb | ENSMUSG00000030519 | Apba2    | 0.671229931 | 0.008842128 |
| mPEPb | ENSMUSG00000028689 | Ccdc163  | 0.67120604  | 0.008650571 |
| mPEPb | ENSMUSG00000024818 | Slc25a45 | 0.670489297 | 0.009533309 |
| mPEPb | ENSMUSG00000024219 | Anks1    | 0.670345948 | 0.009992605 |
| mPEPb | ENSMUSG00000026247 | Ecel1    | 0.670107034 | 0.007944941 |
| mPEPb | ENSMUSG00000020427 | Igfbp3   | 0.670011468 | 0.010310826 |
| mPEPb | ENSMUSG00000067377 | Tspan6   | 0.669892011 | 0.010625527 |
| mPEPb | ENSMUSG00000099893 | NA       | 0.669342508 | 0.008716815 |
| mPEPb | ENSMUSG00000099444 | NA       | 0.669127485 | 0.010613097 |
| mPEPb | ENSMUSG00000071392 | Ect2l    | 0.668912462 | 0.011144517 |
| mPEPb | ENSMUSG00000021916 | Glt8d1   | 0.668769113 | 0.012399699 |
| mPEPb | ENSMUSG00000039059 | Hrh3     | 0.668577982 | 0.012360639 |
| mPEPb | ENSMUSG00000017204 | Gsdma    | 0.668506307 | 0.011127404 |
| mPEPb | ENSMUSG00000050623 | Tex40    | 0.668362959 | 0.013079935 |
| mPEPb | ENSMUSG00000024754 | Tmem2    | 0.668315176 | 0.013184266 |
| mPEPb | ENSMUSG00000022766 | Serpind1 | 0.667574541 | 0.012967676 |
| mPEPb | ENSMUSG00000031028 | Tub      | 0.667120604 | 0.015464995 |
| mPEPb | ENSMUSG00000021686 | Ap3b1    | 0.66704893  | 0.015654864 |
| mPEPb | ENSMUSG00000063628 | NA       | 0.666308295 | 0.01720723  |
| mPEPb | ENSMUSG00000032867 | Fbxw8    | 0.665997706 | 0.01802151  |
| mPEPb | ENSMUSG00000093271 | NA       | 0.665878249 | 0.015418896 |
| mPEPb | ENSMUSG00000074671 | Tspyl3   | 0.665663226 | 0.018840271 |

|       |                    |         |             |             |
|-------|--------------------|---------|-------------|-------------|
| mPEPb | ENSMUSG00000074170 | Plekhf1 | 0.665472095 | 0.01748256  |
| mPEPb | ENSMUSG00000057060 | Slc35f3 | 0.664827026 | 0.020904785 |
| mPEPb | ENSMUSG00000022439 | Parvg   | 0.664134174 | 0.020420866 |
| mPEPb | ENSMUSG00000045777 | Ifitm10 | 0.664134174 | 0.023108691 |
| mPEPb | ENSMUSG00000087296 | NA      | 0.664086391 | 0.017321522 |
| mPEPb | ENSMUSG00000025870 | Arl10   | 0.663297974 | 0.025844578 |
| mPEPb | ENSMUSG00000028108 | Ecm1    | 0.663154625 | 0.026135243 |
| mPEPb | ENSMUSG00000087382 | Ctcflos | 0.662533448 | 0.026588072 |
| mPEPb | ENSMUSG00000021973 | Micu2   | 0.662318425 | 0.029406103 |
| mPEPb | ENSMUSG00000004864 | Mapk13  | 0.661721139 | 0.03010699  |
| mPEPb | ENSMUSG00000054582 | Pabpc1l | 0.661625573 | 0.031871649 |
| mPEPb | ENSMUSG00000027611 | Procr   | 0.661267202 | 0.029710006 |
| mPEPb | ENSMUSG00000074378 | Bsph1   | 0.660837156 | 0.027478343 |
| mPEPb | ENSMUSG00000067973 | Gm6994  | 0.660717699 | 0.034612274 |
| mPEPb | ENSMUSG00000097749 | NA      | 0.660693807 | 0.035530261 |
| mPEPb | ENSMUSG00000019027 | Dnah1   | 0.660550459 | 0.033867872 |
| mPEPb | ENSMUSG00000099162 | NA      | 0.659379778 | 0.036040747 |
| mPEPb | ENSMUSG00000055320 | Tead1   | 0.659355887 | 0.043123891 |
| mPEPb | ENSMUSG00000041773 | Enc1    | 0.658448012 | 0.048251676 |
| pPEP  | ENSMUSG00000059974 | Ntm     | 0.952897809 | 5.73E-23    |
| pPEP  | ENSMUSG00000019929 | Dcn     | 0.930165882 | 2.06E-20    |
| pPEP  | ENSMUSG00000000214 | Th      | 0.90347464  | 1.26E-17    |
| pPEP  | ENSMUSG00000003476 | Crhr2   | 0.895453615 | 6.65E-17    |
| pPEP  | ENSMUSG00000005973 | Rcn1    | 0.882346918 | 1.36E-15    |
| pPEP  | ENSMUSG00000036437 | Npy1r   | 0.875213325 | 6.13E-15    |
| pPEP  | ENSMUSG00000063260 | Syt10   | 0.855485016 | 3.13E-13    |
| pPEP  | ENSMUSG00000029999 | Tgfa    | 0.85200355  | 6.97E-13    |
| pPEP  | ENSMUSG00000037014 | Sstr4   | 0.850706533 | 8.89E-13    |
| pPEP  | ENSMUSG00000097248 | Gm2694  | 0.848317291 | 1.47E-12    |
| pPEP  | ENSMUSG00000037386 | Rims2   | 0.842617243 | 4.63E-12    |
| pPEP  | ENSMUSG00000029503 | P2rx2   | 0.840432794 | 5.86E-12    |
| pPEP  | ENSMUSG00000028464 | Tpm2    | 0.839238173 | 7.77E-12    |
| pPEP  | ENSMUSG00000026748 | Plxdc2  | 0.833640522 | 2.55E-11    |
| pPEP  | ENSMUSG00000005952 | Trpv1   | 0.832206977 | 3.36E-11    |
| pPEP  | ENSMUSG00000038059 | Smim3   | 0.831660864 | 3.73E-11    |
| pPEP  | ENSMUSG00000028785 | Hpca    | 0.829339887 | 5.69E-11    |
| pPEP  | ENSMUSG00000001510 | Dlx3    | 0.827428493 | 7.54E-11    |
| pPEP  | ENSMUSG00000099521 | NA      | 0.826575193 | 7.72E-11    |
| pPEP  | ENSMUSG00000036256 | Igfbp7  | 0.82247935  | 1.77E-10    |
| pPEP  | ENSMUSG00000042499 | Hoxd11  | 0.822103898 | 1.86E-10    |
| pPEP  | ENSMUSG00000064293 | Cntn4   | 0.814594853 | 7.29E-10    |
| pPEP  | ENSMUSG00000030138 | Bms1    | 0.814321797 | 8.86E-10    |
| pPEP  | ENSMUSG00000045092 | S1pr1   | 0.8125128   | 1.19E-09    |

|      |                    |               |             |             |
|------|--------------------|---------------|-------------|-------------|
| pPEP | ENSMUSG00000009292 | Trpm2         | 0.811010991 | 1.59E-09    |
| pPEP | ENSMUSG00000036699 | Zcchc12       | 0.808928937 | 2.26E-09    |
| pPEP | ENSMUSG00000024084 | Qpct          | 0.806744488 | 3.30E-09    |
| pPEP | ENSMUSG00000049265 | Kcnk3         | 0.803331285 | 6.01E-09    |
| pPEP | ENSMUSG00000066361 | Serpina3c     | 0.801249232 | 7.91E-09    |
| pPEP | ENSMUSG00000016520 | Lnx2          | 0.800498328 | 9.65E-09    |
| pPEP | ENSMUSG00000019817 | Plagl1        | 0.800157007 | 1.04E-08    |
| pPEP | ENSMUSG00000028786 | Tmem54        | 0.799235443 | 1.14E-08    |
| pPEP | ENSMUSG00000041261 | Car8          | 0.797426445 | 1.52E-08    |
| pPEP | ENSMUSG00000024420 | Zfp521        | 0.792955151 | 3.29E-08    |
| pPEP | ENSMUSG00000023966 | Rsp9          | 0.78636767  | 1.02E-07    |
| pPEP | ENSMUSG00000031654 | Cbln1         | 0.784797597 | 1.02E-07    |
| pPEP | ENSMUSG00000078721 | Fam205a1      | 0.777834664 | 3.59E-07    |
| pPEP | ENSMUSG00000025533 | Asl           | 0.777732268 | 4.10E-07    |
| pPEP | ENSMUSG00000050711 | Scg2          | 0.776230459 | 5.19E-07    |
| pPEP | ENSMUSG00000021187 | Tc2n          | 0.774182538 | 6.59E-07    |
| pPEP | ENSMUSG00000048978 | Nrsn1         | 0.773158577 | 8.36E-07    |
| pPEP | ENSMUSG00000041594 | Tmtc4         | 0.772817257 | 8.81E-07    |
| pPEP | ENSMUSG00000030677 | Kif22         | 0.76831183  | 1.76E-06    |
| pPEP | ENSMUSG00000066705 | Fxyd6         | 0.766024985 | 2.47E-06    |
| pPEP | ENSMUSG00000017057 | Il13ra1       | 0.763908799 | 3.36E-06    |
| pPEP | ENSMUSG00000074825 | Itipr1        | 0.762714178 | 4.07E-06    |
| pPEP | ENSMUSG00000046719 | Nxph3         | 0.76155369  | 3.93E-06    |
| pPEP | ENSMUSG00000038112 | AW551984      | 0.761417162 | 3.71E-06    |
| pPEP | ENSMUSG00000059674 | Cdh24         | 0.758891392 | 5.90E-06    |
| pPEP | ENSMUSG00000089706 | B230216N24Rik | 0.757799167 | 8.37E-06    |
| pPEP | ENSMUSG00000021108 | Prkch         | 0.756433886 | 9.76E-06    |
| pPEP | ENSMUSG00000061762 | Tac1          | 0.756365622 | 1.04E-05    |
| pPEP | ENSMUSG00000036298 | Slc2a13       | 0.753191344 | 1.60E-05    |
| pPEP | ENSMUSG00000055026 | Gabrg3        | 0.750221858 | 2.38E-05    |
| pPEP | ENSMUSG00000035258 | Abi3bp        | 0.746501468 | 3.68E-05    |
| pPEP | ENSMUSG00000044461 | Shisa2        | 0.746194279 | 3.90E-05    |
| pPEP | ENSMUSG00000087142 | NA            | 0.743190661 | 6.05E-05    |
| pPEP | ENSMUSG00000053194 | Cib4          | 0.741893645 | 6.24E-05    |
| pPEP | ENSMUSG00000023965 | Fbxl17        | 0.741415796 | 8.52E-05    |
| pPEP | ENSMUSG00000062257 | Opcml         | 0.739572667 | 0.000109545 |
| pPEP | ENSMUSG00000022863 | Btg3          | 0.738753499 | 0.00011173  |
| pPEP | ENSMUSG00000030223 | Ptpro         | 0.737661274 | 0.000141176 |
| pPEP | ENSMUSG00000032322 | Pstpip1       | 0.737354086 | 0.000147125 |
| pPEP | ENSMUSG00000031343 | Gabra3        | 0.735784013 | 0.000176018 |
| pPEP | ENSMUSG00000032607 | Amt           | 0.732575602 | 0.000277859 |
| pPEP | ENSMUSG00000046523 | Kctd4         | 0.731585774 | 0.000290013 |
| pPEP | ENSMUSG00000034783 | Cd207         | 0.731244454 | 0.000220217 |

|      |                    |               |             |             |
|------|--------------------|---------------|-------------|-------------|
| pPEP | ENSMUSG00000005949 | Ctns          | 0.73117619  | 0.0003353   |
| pPEP | ENSMUSG00000085067 | NA            | 0.730220493 | 0.000281982 |
| pPEP | ENSMUSG00000005951 | Shpk          | 0.729128268 | 0.000436726 |
| pPEP | ENSMUSG00000031066 | Usp11         | 0.728718684 | 0.000462098 |
| pPEP | ENSMUSG00000039997 | Ifi203        | 0.723701277 | 0.000820179 |
| pPEP | ENSMUSG00000024254 | Abcg8         | 0.722813844 | 0.000855379 |
| pPEP | ENSMUSG00000073968 | Trim68        | 0.722438392 | 0.001027136 |
| pPEP | ENSMUSG00000042289 | Hsd3b7        | 0.722028807 | 0.001081284 |
| pPEP | ENSMUSG00000022180 | Slc7a8        | 0.72056113  | 0.001302886 |
| pPEP | ENSMUSG00000070803 | Cited4        | 0.720015018 | 0.001345404 |
| pPEP | ENSMUSG00000021871 | Pnp           | 0.719741962 | 0.001443992 |
| pPEP | ENSMUSG00000083750 | NA            | 0.718854529 | 0.001253949 |
| pPEP | ENSMUSG00000027977 | Ndst3         | 0.717932965 | 0.001802669 |
| pPEP | ENSMUSG00000006931 | P3h4          | 0.71632876  | 0.00218656  |
| pPEP | ENSMUSG00000074115 | Saa1          | 0.716226364 | 0.002008258 |
| pPEP | ENSMUSG00000038026 | Kcnj9         | 0.715577855 | 0.001845156 |
| pPEP | ENSMUSG00000034853 | Acot11        | 0.713393406 | 0.00309944  |
| pPEP | ENSMUSG00000040978 | Gm11992       | 0.713017953 | 0.003243303 |
| pPEP | ENSMUSG00000000686 | Abhd15        | 0.712608369 | 0.003320858 |
| pPEP | ENSMUSG00000022021 | Diaph3        | 0.711345484 | 0.004018731 |
| pPEP | ENSMUSG00000048540 | Nhlh2         | 0.710014335 | 0.004609472 |
| pPEP | ENSMUSG00000026437 | Cdk18         | 0.709980203 | 0.004495115 |
| pPEP | ENSMUSG00000014599 | Csf1          | 0.709536487 | 0.004974275 |
| pPEP | ENSMUSG00000031024 | St5           | 0.708375998 | 0.005676548 |
| pPEP | ENSMUSG00000057465 | Saa2          | 0.708341866 | 0.004942888 |
| pPEP | ENSMUSG00000029878 | Dbpht2        | 0.706805925 | 0.006895088 |
| pPEP | ENSMUSG00000000126 | Wnt9a         | 0.705747833 | 0.007748862 |
| pPEP | ENSMUSG00000046093 | Hpcal4        | 0.704758004 | 0.008642335 |
| pPEP | ENSMUSG00000052397 | Ezr           | 0.704484948 | 0.009034419 |
| pPEP | ENSMUSG00000083498 | NA            | 0.70417776  | 0.007609334 |
| pPEP | ENSMUSG00000019850 | Tnfaip3       | 0.703904703 | 0.009375809 |
| pPEP | ENSMUSG00000039385 | Cdh6          | 0.703904703 | 0.009540234 |
| pPEP | ENSMUSG00000039462 | Col10a1       | 0.703324459 | 0.008639948 |
| pPEP | ENSMUSG00000042401 | Crtac1        | 0.702641819 | 0.011166758 |
| pPEP | ENSMUSG00000005672 | Kit           | 0.701754386 | 0.0123462   |
| pPEP | ENSMUSG00000085992 | NA            | 0.701754386 | 0.010049489 |
| pPEP | ENSMUSG00000104860 | NA            | 0.701003481 | 0.012441122 |
| pPEP | ENSMUSG00000036139 | Hoxc9         | 0.700525633 | 0.01289032  |
| pPEP | ENSMUSG00000026922 | Agpat2        | 0.700354973 | 0.014088911 |
| pPEP | ENSMUSG00000020654 | Adcy3         | 0.700320841 | 0.014534786 |
| pPEP | ENSMUSG00000039579 | Grin3a        | 0.699911257 | 0.01521658  |
| pPEP | ENSMUSG00000097074 | 4833428L15Rik | 0.69827292  | 0.015153743 |
| pPEP | ENSMUSG00000070366 | Plpp4         | 0.697897467 | 0.018323216 |

|      |                    |           |             |             |
|------|--------------------|-----------|-------------|-------------|
| pPEP | ENSMUSG00000049892 | Rasd1     | 0.696839375 | 0.021449763 |
| pPEP | ENSMUSG00000063430 | Wscd2     | 0.696566319 | 0.021513674 |
| pPEP | ENSMUSG00000102101 | Zbtb11os1 | 0.696463922 | 0.02232415  |
| pPEP | ENSMUSG00000031210 | Gpr165    | 0.695713018 | 0.024156602 |
| pPEP | ENSMUSG00000018451 | NA        | 0.695132774 | 0.026008191 |
| pPEP | ENSMUSG00000034435 | Tmem30b   | 0.694484265 | 0.025482875 |
| pPEP | ENSMUSG00000061535 | C1qtnf7   | 0.694381869 | 0.028164484 |
| pPEP | ENSMUSG00000024867 | Pip5k1b   | 0.693938153 | 0.029550534 |
| pPEP | ENSMUSG00000057329 | Bcl2      | 0.69236808  | 0.035147871 |
| pPEP | ENSMUSG00000034758 | Tle6      | 0.69219742  | 0.035499812 |
| pPEP | ENSMUSG00000024256 | Adcyap1   | 0.691924363 | 0.0368851   |
| pPEP | ENSMUSG00000031681 | Smad1     | 0.691378251 | 0.039167337 |
| pPEP | ENSMUSG00000020241 | Col6a2    | 0.691241723 | 0.039112321 |
| pPEP | ENSMUSG00000048721 | Fndc9     | 0.689739914 | 0.045972966 |
| pPEP | ENSMUSG00000009291 | Pttg1ip   | 0.68933033  | 0.048908876 |
| pPEP | ENSMUSG00000030866 | Ern2      | 0.689296198 | 0.040310822 |
| pNF  | ENSMUSG00000022123 | Scel      | 0.98280303  | 1.60E-23    |
| pNF  | ENSMUSG00000025739 | Gng13     | 0.97719697  | 2.30E-23    |
| pNF  | ENSMUSG00000035273 | Hpse      | 0.975416667 | 3.94E-23    |
| pNF  | ENSMUSG00000031355 | Arhgap6   | 0.975075758 | 1.10E-22    |
| pNF  | ENSMUSG00000054477 | Kcnn2     | 0.972727273 | 2.43E-22    |
| pNF  | ENSMUSG00000022762 | Ncam2     | 0.971969697 | 2.85E-22    |
| pNF  | ENSMUSG00000056423 | Uts2b     | 0.971856061 | 7.86E-23    |
| pNF  | ENSMUSG00000026110 | Mgat4a    | 0.968484848 | 6.72E-22    |
| pNF  | ENSMUSG00000039488 | Cntn5     | 0.968257576 | 5.39E-22    |
| pNF  | ENSMUSG00000063446 | Plppr1    | 0.965681818 | 6.22E-22    |
| pNF  | ENSMUSG00000042589 | Cux2      | 0.965530303 | 1.14E-21    |
| pNF  | ENSMUSG00000036095 | Dgkb      | 0.964242424 | 1.28E-21    |
| pNF  | ENSMUSG00000040254 | Sema3d    | 0.963939394 | 1.16E-21    |
| pNF  | ENSMUSG00000036854 | Hspb6     | 0.961818182 | 3.11E-21    |
| pNF  | ENSMUSG00000047712 | Ust       | 0.957651515 | 7.19E-21    |
| pNF  | ENSMUSG00000024526 | Cidea     | 0.954469697 | 1.42E-20    |
| pNF  | ENSMUSG00000040147 | Maob      | 0.954166667 | 1.39E-20    |
| pNF  | ENSMUSG00000029851 | Tcaf2     | 0.948106061 | 6.07E-20    |
| pNF  | ENSMUSG00000034109 | Golim4    | 0.948030303 | 7.74E-20    |
| pNF  | ENSMUSG00000036103 | Colec12   | 0.946969697 | 3.21E-20    |
| pNF  | ENSMUSG00000100706 | NA        | 0.940530303 | 1.69E-19    |
| pNF  | ENSMUSG00000000093 | Tbx2      | 0.939924242 | 4.56E-19    |
| pNF  | ENSMUSG00000041741 | Pde3a     | 0.939583333 | 2.56E-19    |
| pNF  | ENSMUSG00000061132 | Blnk      | 0.937537879 | 2.88E-19    |
| pNF  | ENSMUSG00000031561 | Tenm3     | 0.936893939 | 8.13E-19    |
| pNF  | ENSMUSG00000059901 | Adamts14  | 0.936590909 | 4.97E-19    |
| pNF  | ENSMUSG00000031298 | Adgrg2    | 0.935151515 | 1.34E-18    |

|     |                    |               |             |          |
|-----|--------------------|---------------|-------------|----------|
| pNF | ENSMUSG00000020053 | Igf1          | 0.934507576 | 5.46E-19 |
| pNF | ENSMUSG00000049493 | Pls1          | 0.934242424 | 1.16E-18 |
| pNF | ENSMUSG00000019768 | Esr1          | 0.932878788 | 2.16E-18 |
| pNF | ENSMUSG00000048281 | Dleu7         | 0.929924242 | 2.23E-18 |
| pNF | ENSMUSG00000030790 | Adm           | 0.926666667 | 7.75E-18 |
| pNF | ENSMUSG00000024866 | Acy3          | 0.925681818 | 8.53E-18 |
| pNF | ENSMUSG00000045589 | Frrs1l        | 0.925681818 | 9.37E-18 |
| pNF | ENSMUSG00000063296 | Tmem117       | 0.92530303  | 1.20E-17 |
| pNF | ENSMUSG00000031245 | Hmgn5         | 0.924848485 | 1.12E-17 |
| pNF | ENSMUSG00000020015 | Cdk17         | 0.924242424 | 1.41E-17 |
| pNF | ENSMUSG00000053647 | Gper1         | 0.922424242 | 9.26E-18 |
| pNF | ENSMUSG00000027966 | Col11a1       | 0.921818182 | 1.90E-17 |
| pNF | ENSMUSG00000046997 | Spsb4         | 0.918636364 | 4.97E-17 |
| pNF | ENSMUSG00000002059 | Rab34         | 0.917007576 | 5.67E-17 |
| pNF | ENSMUSG00000034755 | Pcdh11x       | 0.915719697 | 4.47E-17 |
| pNF | ENSMUSG00000009654 | Oit3          | 0.915568182 | 4.09E-17 |
| pNF | ENSMUSG00000061758 | Akr1b10       | 0.915227273 | 8.31E-17 |
| pNF | ENSMUSG00000035473 | Galm          | 0.915227273 | 8.11E-17 |
| pNF | ENSMUSG00000052026 | Slc6a7        | 0.914166667 | 7.59E-17 |
| pNF | ENSMUSG00000052911 | Lamb2         | 0.913901515 | 8.96E-17 |
| pNF | ENSMUSG00000019945 | 1700040L02Rik | 0.913863636 | 5.16E-17 |
| pNF | ENSMUSG00000074971 | Fibin         | 0.912992424 | 6.03E-17 |
| pNF | ENSMUSG00000040037 | Negr1         | 0.9125      | 1.80E-16 |
| pNF | ENSMUSG00000006221 | Hspb7         | 0.911287879 | 7.93E-17 |
| pNF | ENSMUSG00000003420 | Fcgrt         | 0.909924242 | 2.55E-16 |
| pNF | ENSMUSG00000073574 | Grxcr2        | 0.908409091 | 2.47E-16 |
| pNF | ENSMUSG00000029101 | Rgs12         | 0.90780303  | 4.14E-16 |
| pNF | ENSMUSG00000023972 | Ptk7          | 0.906136364 | 6.07E-16 |
| pNF | ENSMUSG00000055322 | Tns1          | 0.904469697 | 8.62E-16 |
| pNF | ENSMUSG00000032269 | Htr3a         | 0.904015152 | 1.05E-15 |
| pNF | ENSMUSG00000082674 | NA            | 0.903560606 | 5.69E-16 |
| pNF | ENSMUSG00000021846 | Peli2         | 0.902272727 | 1.50E-15 |
| pNF | ENSMUSG00000005803 | Sqrdl         | 0.902045455 | 1.19E-15 |
| pNF | ENSMUSG00000033022 | Cdo1          | 0.901666667 | 1.64E-15 |
| pNF | ENSMUSG00000033342 | Plppr5        | 0.899545455 | 1.88E-15 |
| pNF | ENSMUSG00000029771 | Irf5          | 0.899507576 | 2.13E-15 |
| pNF | ENSMUSG00000032714 | Syde1         | 0.899090909 | 1.67E-15 |
| pNF | ENSMUSG00000029304 | Spp1          | 0.898901515 | 1.99E-15 |
| pNF | ENSMUSG00000020085 | Aifm2         | 0.898636364 | 2.45E-15 |
| pNF | ENSMUSG00000034472 | Rasd2         | 0.898106061 | 2.48E-15 |
| pNF | ENSMUSG00000021587 | Pcsk1         | 0.897878788 | 3.71E-15 |
| pNF | ENSMUSG00000030341 | Tnfrsf1a      | 0.89719697  | 3.26E-15 |
| pNF | ENSMUSG00000001656 | Hoxc11        | 0.896212121 | 3.09E-15 |

|     |                    |          |             |          |
|-----|--------------------|----------|-------------|----------|
| pNF | ENSMUSG00000024805 | Pcgf5    | 0.895757576 | 4.97E-15 |
| pNF | ENSMUSG00000022425 | Enpp2    | 0.895568182 | 4.30E-15 |
| pNF | ENSMUSG00000039481 | Nrtn     | 0.89530303  | 3.04E-15 |
| pNF | ENSMUSG00000044674 | Fzd1     | 0.894507576 | 5.73E-15 |
| pNF | ENSMUSG00000018862 | Otop3    | 0.893484848 | 7.09E-15 |
| pNF | ENSMUSG00000053025 | Sv2b     | 0.893181818 | 9.45E-15 |
| pNF | ENSMUSG00000033350 | Chst2    | 0.89280303  | 1.03E-14 |
| pNF | ENSMUSG00000020848 | Doc2b    | 0.892007576 | 7.48E-15 |
| pNF | ENSMUSG00000048376 | F2r      | 0.891212121 | 1.09E-14 |
| pNF | ENSMUSG00000075297 | H60b     | 0.891174242 | 6.67E-15 |
| pNF | ENSMUSG00000046417 | Lrrc75a  | 0.890568182 | 9.28E-15 |
| pNF | ENSMUSG00000091811 | Inafm1   | 0.89030303  | 1.69E-14 |
| pNF | ENSMUSG00000034135 | Sik3     | 0.889924242 | 1.79E-14 |
| pNF | ENSMUSG00000032609 | Klhdc8b  | 0.888257576 | 2.53E-14 |
| pNF | ENSMUSG00000056215 | Lrguk    | 0.888106061 | 2.57E-14 |
| pNF | ENSMUSG00000025402 | Nab2     | 0.887045455 | 2.70E-14 |
| pNF | ENSMUSG00000019487 | Trip10   | 0.885416667 | 4.09E-14 |
| pNF | ENSMUSG00000032360 | Hctr2    | 0.885113636 | 2.85E-14 |
| pNF | ENSMUSG00000051022 | Hs3st1   | 0.884545455 | 4.27E-14 |
| pNF | ENSMUSG00000029086 | Prom1    | 0.883257576 | 3.43E-14 |
| pNF | ENSMUSG00000098158 | NA       | 0.883257576 | 5.86E-14 |
| pNF | ENSMUSG00000050368 | Hoxd10   | 0.882121212 | 6.97E-14 |
| pNF | ENSMUSG00000027078 | Ube2l6   | 0.881893939 | 8.82E-14 |
| pNF | ENSMUSG00000027263 | Tubgcp4  | 0.881363636 | 9.77E-14 |
| pNF | ENSMUSG00000094500 | Smim18   | 0.881287879 | 9.47E-14 |
| pNF | ENSMUSG00000022358 | Fbxo32   | 0.881212121 | 9.96E-14 |
| pNF | ENSMUSG00000079657 | Rab26    | 0.880416667 | 1.07E-13 |
| pNF | ENSMUSG00000027560 | Dok5     | 0.88030303  | 1.14E-13 |
| pNF | ENSMUSG00000097618 | NA       | 0.88030303  | 5.61E-14 |
| pNF | ENSMUSG00000050619 | Zscan29  | 0.879848485 | 1.31E-13 |
| pNF | ENSMUSG00000030339 | Ltbr     | 0.879848485 | 1.25E-13 |
| pNF | ENSMUSG00000048497 | Mmgt2    | 0.878939394 | 1.51E-13 |
| pNF | ENSMUSG00000059361 | Nrsn2    | 0.876893939 | 2.30E-13 |
| pNF | ENSMUSG00000074218 | Cox7a1   | 0.876818182 | 2.32E-13 |
| pNF | ENSMUSG00000017724 | Etv4     | 0.876704545 | 1.13E-13 |
| pNF | ENSMUSG00000036782 | Kihl13   | 0.875909091 | 2.79E-13 |
| pNF | ENSMUSG00000022525 | Hrasls   | 0.875757576 | 1.58E-13 |
| pNF | ENSMUSG00000034295 | Fhod3    | 0.87344697  | 4.08E-13 |
| pNF | ENSMUSG00000039628 | Hs3st6   | 0.873181818 | 2.56E-13 |
| pNF | ENSMUSG00000049097 | Ankrd34a | 0.872878788 | 4.66E-13 |
| pNF | ENSMUSG00000000792 | Slc5a5   | 0.871212121 | 6.48E-13 |
| pNF | ENSMUSG00000032348 | Gsta4    | 0.871136364 | 6.77E-13 |
| pNF | ENSMUSG00000021710 | Nln      | 0.870909091 | 7.17E-13 |

|     |                    |               |             |          |
|-----|--------------------|---------------|-------------|----------|
| pNF | ENSMUSG00000055540 | Epha6         | 0.870757576 | 4.33E-13 |
| pNF | ENSMUSG00000061171 | Slc38a11      | 0.870606061 | 3.00E-13 |
| pNF | ENSMUSG00000034488 | Edil3         | 0.869545455 | 9.34E-13 |
| pNF | ENSMUSG00000036907 | C1ql2         | 0.869242424 | 7.03E-13 |
| pNF | ENSMUSG00000020806 | Rhbdf2        | 0.868787879 | 7.15E-13 |
| pNF | ENSMUSG00000035109 | Shc4          | 0.868636364 | 9.78E-13 |
| pNF | ENSMUSG00000035835 | Plppr3        | 0.868560606 | 1.05E-12 |
| pNF | ENSMUSG00000032246 | Calml4        | 0.868560606 | 1.06E-12 |
| pNF | ENSMUSG00000044258 | Ctla2a        | 0.868181818 | 4.83E-13 |
| pNF | ENSMUSG00000020473 | Aebp1         | 0.867537879 | 8.17E-13 |
| pNF | ENSMUSG00000026610 | Esrrg         | 0.864280303 | 1.42E-12 |
| pNF | ENSMUSG00000034613 | Ppm1h         | 0.863106061 | 3.10E-12 |
| pNF | ENSMUSG00000030731 | Syt3          | 0.862348485 | 3.33E-12 |
| pNF | ENSMUSG00000045094 | Arhgef37      | 0.861098485 | 3.30E-12 |
| pNF | ENSMUSG00000031870 | Pgr           | 0.859810606 | 5.42E-12 |
| pNF | ENSMUSG00000027297 | Ltk           | 0.859204545 | 3.01E-12 |
| pNF | ENSMUSG00000008590 | Htr3b         | 0.85905303  | 6.02E-12 |
| pNF | ENSMUSG00000021760 | Gpx8          | 0.85844697  | 6.77E-12 |
| pNF | ENSMUSG00000017491 | Rarb          | 0.857840909 | 6.35E-12 |
| pNF | ENSMUSG00000096936 | NA            | 0.856969697 | 6.71E-12 |
| pNF | ENSMUSG00000103255 | Pcdhac1       | 0.856666667 | 9.95E-12 |
| pNF | ENSMUSG00000040373 | Cacng5        | 0.856212121 | 1.01E-11 |
| pNF | ENSMUSG00000053158 | Fes           | 0.855984848 | 5.69E-12 |
| pNF | ENSMUSG00000021895 | Arhgef3       | 0.854810606 | 1.28E-11 |
| pNF | ENSMUSG00000050822 | Slc29a4       | 0.854242424 | 1.57E-11 |
| pNF | ENSMUSG00000052364 | B630019K06Rik | 0.853560606 | 1.77E-11 |
| pNF | ENSMUSG00000020178 | Adora2a       | 0.853522727 | 1.69E-11 |
| pNF | ENSMUSG00000032387 | Rbpms2        | 0.853219697 | 1.06E-11 |
| pNF | ENSMUSG00000038515 | Grtp1         | 0.850909091 | 2.08E-11 |
| pNF | ENSMUSG00000040520 | Manea         | 0.850643939 | 2.98E-11 |
| pNF | ENSMUSG00000026167 | Wnt10a        | 0.850037879 | 1.76E-11 |
| pNF | ENSMUSG00000047658 | Gal3st3       | 0.84905303  | 2.77E-11 |
| pNF | ENSMUSG00000044067 | Gpr22         | 0.847878788 | 4.86E-11 |
| pNF | ENSMUSG00000002459 | Rgs20         | 0.847727273 | 4.51E-11 |
| pNF | ENSMUSG00000044716 | Dok7          | 0.846628788 | 5.72E-11 |
| pNF | ENSMUSG00000034796 | Cpne7         | 0.846136364 | 2.62E-11 |
| pNF | ENSMUSG00000031409 | Tceal6        | 0.845568182 | 6.70E-11 |
| pNF | ENSMUSG00000000690 | Hoxb6         | 0.845113636 | 6.40E-11 |
| pNF | ENSMUSG00000023015 | Racgap1       | 0.844318182 | 8.04E-11 |
| pNF | ENSMUSG00000024376 | Epb41l4a      | 0.842916667 | 9.52E-11 |
| pNF | ENSMUSG00000060591 | Ifitm2        | 0.841515152 | 1.42E-10 |
| pNF | ENSMUSG00000026173 | Plcd4         | 0.840454545 | 1.78E-10 |
| pNF | ENSMUSG00000021226 | Acot2         | 0.839772727 | 2.01E-10 |



|     |                    |               |             |          |
|-----|--------------------|---------------|-------------|----------|
| pNF | ENSMUSG00000020656 | Grhl1         | 0.839734848 | 1.45E-10 |
| pNF | ENSMUSG00000000440 | Pparg         | 0.839583333 | 1.64E-10 |
| pNF | ENSMUSG00000049612 | Omg           | 0.837992424 | 2.26E-10 |
| pNF | ENSMUSG00000032625 | Thsd7a        | 0.836893939 | 3.32E-10 |
| pNF | ENSMUSG00000032417 | Rwdd2a        | 0.836666667 | 3.39E-10 |
| pNF | ENSMUSG00000086596 | Susd5         | 0.835871212 | 2.37E-10 |
| pNF | ENSMUSG00000059277 | R74862        | 0.834734848 | 2.80E-10 |
| pNF | ENSMUSG00000056306 | Sertm1        | 0.833977273 | 5.28E-10 |
| pNF | ENSMUSG00000032816 | Igdcc4        | 0.833598485 | 4.91E-10 |
| pNF | ENSMUSG00000058571 | Gpc6          | 0.832878788 | 6.50E-10 |
| pNF | ENSMUSG00000078350 | Smim1         | 0.832348485 | 6.92E-10 |
| pNF | ENSMUSG00000014813 | Stc1          | 0.83219697  | 3.20E-10 |
| pNF | ENSMUSG00000020773 | Trim47        | 0.831704545 | 5.94E-10 |
| pNF | ENSMUSG00000024451 | Arap3         | 0.831628788 | 6.55E-10 |
| pNF | ENSMUSG00000024349 | Tmem173       | 0.831515152 | 6.86E-10 |
| pNF | ENSMUSG00000041078 | Grid1         | 0.831136364 | 7.69E-10 |
| pNF | ENSMUSG00000074682 | Zcchc3        | 0.830909091 | 9.13E-10 |
| pNF | ENSMUSG00000030606 | Hapln3        | 0.830265152 | 7.42E-10 |
| pNF | ENSMUSG00000000938 | Hoxa10        | 0.829166667 | 1.21E-09 |
| pNF | ENSMUSG00000050132 | Sarm1         | 0.828333333 | 1.42E-09 |
| pNF | ENSMUSG00000043857 | Mgat5b        | 0.828257576 | 1.38E-09 |
| pNF | ENSMUSG00000048240 | Gng7          | 0.827083333 | 1.65E-09 |
| pNF | ENSMUSG00000042155 | Klhl23        | 0.826704545 | 1.41E-09 |
| pNF | ENSMUSG00000050103 | Agmo          | 0.826287879 | 1.23E-09 |
| pNF | ENSMUSG00000049176 | Frrmpd4       | 0.825681818 | 2.11E-09 |
| pNF | ENSMUSG00000035342 | Lzts2         | 0.825416667 | 2.17E-09 |
| pNF | ENSMUSG00000003469 | Phyhip        | 0.824166667 | 2.70E-09 |
| pNF | ENSMUSG00000035105 | Egln3         | 0.82405303  | 1.49E-09 |
| pNF | ENSMUSG00000091475 | 2810468N07Rik | 0.823977273 | 1.91E-09 |
| pNF | ENSMUSG00000071856 | Mcc           | 0.823977273 | 2.88E-09 |
| pNF | ENSMUSG00000036144 | Meox2         | 0.823787879 | 1.33E-09 |
| pNF | ENSMUSG00000067279 | Ppp1r3c       | 0.822348485 | 2.66E-09 |
| pNF | ENSMUSG00000005057 | Sh2b2         | 0.822045455 | 3.74E-09 |
| pNF | ENSMUSG00000030605 | Mfge8         | 0.821931818 | 3.61E-09 |
| pNF | ENSMUSG00000049555 | Tmie          | 0.821022727 | 2.54E-09 |
| pNF | ENSMUSG00000022799 | Arhgap31      | 0.820454545 | 5.14E-09 |
| pNF | ENSMUSG00000032495 | Lrrc2         | 0.819583333 | 5.60E-09 |
| pNF | ENSMUSG00000030518 | Fam189a1      | 0.81844697  | 6.46E-09 |
| pNF | ENSMUSG00000028378 | Ptgr1         | 0.817954545 | 7.77E-09 |
| pNF | ENSMUSG00000040703 | Cyp2s1        | 0.817310606 | 5.93E-09 |
| pNF | ENSMUSG00000020598 | Nrcam         | 0.815454545 | 1.17E-08 |
| pNF | ENSMUSG00000053963 | 6330403A02Rik | 0.814128788 | 1.09E-08 |
| pNF | ENSMUSG00000011305 | Plin5         | 0.814015152 | 7.75E-09 |

|     |                    |          |             |          |
|-----|--------------------|----------|-------------|----------|
| pNF | ENSMUSG00000082361 | Btc      | 0.813939394 | 1.34E-08 |
| pNF | ENSMUSG00000071369 | Map3k5   | 0.813787879 | 1.53E-08 |
| pNF | ENSMUSG00000032303 | Chrna3   | 0.813560606 | 1.56E-08 |
| pNF | ENSMUSG00000021379 | Id4      | 0.813484848 | 1.61E-08 |
| pNF | ENSMUSG00000014932 | Yes1     | 0.812878788 | 1.76E-08 |
| pNF | ENSMUSG00000031548 | Sfrp1    | 0.812651515 | 1.79E-08 |
| pNF | ENSMUSG00000024427 | Spry4    | 0.810909091 | 2.43E-08 |
| pNF | ENSMUSG00000038319 | Kcnh2    | 0.810530303 | 2.44E-08 |
| pNF | ENSMUSG00000104696 | NA       | 0.810189394 | 1.88E-08 |
| pNF | ENSMUSG00000097745 | Al115009 | 0.81        | 2.34E-08 |
| pNF | ENSMUSG00000024601 | Isoc1    | 0.809545455 | 3.02E-08 |
| pNF | ENSMUSG00000027296 | Itpka    | 0.808484848 | 1.94E-08 |
| pNF | ENSMUSG00000002885 | Adgre5   | 0.806590909 | 3.71E-08 |
| pNF | ENSMUSG00000044968 | Napepld  | 0.806515152 | 4.57E-08 |
| pNF | ENSMUSG00000052373 | Mpp3     | 0.805984848 | 5.23E-08 |
| pNF | ENSMUSG00000028488 | Sh3gl2   | 0.805454545 | 5.74E-08 |
| pNF | ENSMUSG00000056899 | Immp2l   | 0.804621212 | 6.48E-08 |
| pNF | ENSMUSG00000029378 | Areg     | 0.804318182 | 4.00E-08 |
| pNF | ENSMUSG00000032431 | Crtap    | 0.804318182 | 6.80E-08 |
| pNF | ENSMUSG00000044646 | Zbtb7c   | 0.803863636 | 6.11E-08 |
| pNF | ENSMUSG00000030137 | Tuba8    | 0.803787879 | 5.16E-08 |
| pNF | ENSMUSG00000026471 | Mr1      | 0.803636364 | 6.12E-08 |
| pNF | ENSMUSG00000019822 | Smpd2    | 0.803295455 | 7.46E-08 |
| pNF | ENSMUSG00000038543 | BC028528 | 0.803219697 | 7.65E-08 |
| pNF | ENSMUSG00000035566 | Pcdh17   | 0.803106061 | 8.26E-08 |
| pNF | ENSMUSG00000020407 | Upp1     | 0.801515152 | 1.02E-07 |
| pNF | ENSMUSG00000024087 | Cyp1b1   | 0.801477273 | 1.02E-07 |
| pNF | ENSMUSG00000021974 | Fgf9     | 0.800719697 | 1.09E-07 |
| pNF | ENSMUSG00000020810 | Cygb     | 0.799924242 | 1.35E-07 |
| pNF | ENSMUSG00000021947 | Cryl1    | 0.799772727 | 1.38E-07 |
| pNF | ENSMUSG00000023249 | Parp3    | 0.799166667 | 1.48E-07 |
| pNF | ENSMUSG00000022044 | Stmn4    | 0.798787879 | 1.56E-07 |
| pNF | ENSMUSG00000086903 | Hotair   | 0.797878788 | 1.38E-07 |
| pNF | ENSMUSG00000041180 | Hectd2   | 0.797575758 | 1.89E-07 |
| pNF | ENSMUSG00000040653 | Ppp1r14c | 0.797310606 | 1.97E-07 |
| pNF | ENSMUSG00000031246 | Sh3bgrl  | 0.797045455 | 2.09E-07 |
| pNF | ENSMUSG00000042594 | Sh2b3    | 0.796704545 | 2.20E-07 |
| pNF | ENSMUSG00000047344 | Lancl3   | 0.796212121 | 2.30E-07 |
| pNF | ENSMUSG00000038296 | Galnt18  | 0.796060606 | 2.42E-07 |
| pNF | ENSMUSG00000037548 | H2-DMb2  | 0.795984848 | 1.82E-07 |
| pNF | ENSMUSG00000022484 | Hoxc10   | 0.795378788 | 2.38E-07 |
| pNF | ENSMUSG00000001494 | Sost     | 0.795265152 | 1.37E-07 |
| pNF | ENSMUSG00000087201 | NA       | 0.792840909 | 2.54E-07 |

|     |                    |               |             |             |          |
|-----|--------------------|---------------|-------------|-------------|----------|
| pNF | ENSMUSG00000086555 | Gm13446       | 0.79219697  | 2.95E-07    |          |
| pNF | ENSMUSG00000054520 | Sh3bp2        | 0.792083333 | 3.60E-07    |          |
| pNF | ENSMUSG00000022817 | Itgb5         | 0.791893939 | 3.98E-07    |          |
| pNF | ENSMUSG00000006218 | Fam131c       | 0.791515152 | 3.71E-07    |          |
| pNF | ENSMUSG00000023092 | Fhl1          | 0.791287879 | 4.97E-07    |          |
| pNF | ENSMUSG00000002341 | Ncan          | 0.790681818 | 5.03E-07    |          |
| pNF | ENSMUSG00000027800 | Tm4sf1        | 0.789393939 | 5.11E-07    |          |
| pNF | ENSMUSG00000041736 | Tspo          | 0.788939394 | 6.88E-07    |          |
| pNF | ENSMUSG00000020589 | Fam49a        | 0.788333333 | 7.66E-07    |          |
| pNF | ENSMUSG00000055567 | Unc80         | 0.787727273 | 8.39E-07    |          |
| pNF | ENSMUSG00000011148 | Adssl1        | 0.787348485 | 6.66E-07    |          |
| pNF | ENSMUSG00000022376 | Adcy8         | 0.787159091 | 8.05E-07    |          |
| pNF | ENSMUSG00000020904 | Cfap52        | 0.787083333 | 5.97E-07    |          |
| pNF | ENSMUSG00000022441 | Efcab6        | 0.785984848 | 9.55E-07    |          |
| pNF | ENSMUSG00000044014 | Npy5r         | 0.785795455 | 9.01E-07    |          |
| pNF | ENSMUSG00000052889 | Prkcb         | 0.785227273 | 1.17E-06    |          |
| pNF | ENSMUSG00000037523 | Mavs          | 0.784772727 | 1.22E-06    |          |
| pNF | ENSMUSG00000051043 | Gprc5c        | 0.784242424 | 1.34E-06    |          |
| pNF | ENSMUSG00000041801 | Phlda3        | 0.783712121 | 1.50E-06    |          |
| pNF | ENSMUSG00000028434 | Epb41l4b      | 0.783712121 | 1.42E-06    |          |
| pNF | ENSMUSG00000033688 | 1300017J02Rik | 0.783484848 | 1.42E-06    |          |
| pNF | ENSMUSG00000003436 | Dll3          | 0.783409091 | 1.48E-06    |          |
| pNF | ENSMUSG00000058153 | Sez6l         | 0.783371212 | 1.23E-06    |          |
| pNF | ENSMUSG00000051067 | Lingo3        | 0.783068182 | 1.35E-06    |          |
| pNF | ENSMUSG00000025213 | Kazald1       | 0.781931818 | 1.72E-06    |          |
| pNF | ENSMUSG00000009646 | Pla2g12b      | 0.781439394 | 1.24E-06    |          |
| pNF | ENSMUSG00000078117 | NA            | 0.78094697  | 1.89E-06    |          |
| pNF | ENSMUSG00000048772 | Tmem53        | 0.780643939 | 2.34E-06    |          |
| pNF | ENSMUSG00000032392 | Parp16        | 0.780530303 | 2.35E-06    |          |
| pNF | ENSMUSG00000029864 | Gstk1         | 0.780454545 | 2.28E-06    |          |
| pNF | ENSMUSG00000019916 | P4ha1         | 0.78030303  | 2.46E-06    |          |
| pNF | ENSMUSG00000019055 | Plod1         | 0.779545455 | 2.74E-06    |          |
| pNF | ENSMUSG00000031022 | BC051019      | 0.779507576 | 2.21E-06    |          |
| pNF | ENSMUSG00000041920 | Slc16a6       | 0.779204545 | 2.80E-06    |          |
| pNF | ENSMUSG00000040713 | Creg1         | 0.779015152 | 2.95E-06    |          |
| pNF | ENSMUSG00000073102 | Drc1          | 0.778409091 | 3.14E-06    |          |
| pNF | ENSMUSG00000057729 | Prtn3         | 0.77780303  | 2.39E-06    |          |
| pNF | ENSMUSG00000029762 | Akr1b8        | 0.777575758 | 3.23E-06    |          |
| pNF | ENSMUSG00000021069 | Pygl          | 0.777348485 | 3.74E-06    |          |
| pNF | ENSMUSG00000059248 |               | Sep-09      | 0.777272727 | 3.75E-06 |
| pNF | ENSMUSG00000002897 | Il17ra        | 0.776439394 | 4.09E-06    |          |
| pNF | ENSMUSG00000034919 | Ttc22         | 0.776363636 | 3.24E-06    |          |
| pNF | ENSMUSG00000044134 | Fam109a       | 0.775795455 | 4.64E-06    |          |

|     |                     |               |             |          |
|-----|---------------------|---------------|-------------|----------|
| pNF | ENSMUSG00000039910  | Cited2        | 0.775       | 5.22E-06 |
| pNF | ENSMUSG00000003354  | Ccdc65        | 0.774583333 | 5.14E-06 |
| pNF | ENSMUSG00000000959  | Oxa1l         | 0.774242424 | 5.81E-06 |
| pNF | ENSMUSG000000037169 | Mycn          | 0.774242424 | 5.67E-06 |
| pNF | ENSMUSG000000039873 | Neurl2        | 0.774204545 | 4.89E-06 |
| pNF | ENSMUSG00000004655  | Aqp1          | 0.774090909 | 5.92E-06 |
| pNF | ENSMUSG000000029392 | Rilpl1        | 0.773712121 | 6.24E-06 |
| pNF | ENSMUSG000000046668 | Cxxc5         | 0.772954545 | 6.93E-06 |
| pNF | ENSMUSG000000056091 | St3gal5       | 0.77219697  | 7.68E-06 |
| pNF | ENSMUSG000000049858 | Suox          | 0.772007576 | 7.83E-06 |
| pNF | ENSMUSG000000017830 | Dhx58         | 0.771856061 | 7.64E-06 |
| pNF | ENSMUSG000000040972 | Igsf21        | 0.771818182 | 7.20E-06 |
| pNF | ENSMUSG000000036867 | Smad6         | 0.771477273 | 6.50E-06 |
| pNF | ENSMUSG000000047117 | Ankdd1b       | 0.771325758 | 8.61E-06 |
| pNF | ENSMUSG000000028527 | Ak4           | 0.770681818 | 9.24E-06 |
| pNF | ENSMUSG000000091586 | Cyp4f17       | 0.770568182 | 5.87E-06 |
| pNF | ENSMUSG000000038963 | Slco4a1       | 0.769886364 | 8.95E-06 |
| pNF | ENSMUSG000000020599 | Rgs9          | 0.769166667 | 1.16E-05 |
| pNF | ENSMUSG000000042364 | Snx18         | 0.769015152 | 1.20E-05 |
| pNF | ENSMUSG000000033063 | Cntnap3       | 0.768901515 | 1.04E-05 |
| pNF | ENSMUSG000000029126 | Nsg1          | 0.768560606 | 1.27E-05 |
| pNF | ENSMUSG000000053477 | Tcf4          | 0.768409091 | 1.30E-05 |
| pNF | ENSMUSG000000029370 | Rassf6        | 0.767916667 | 1.30E-05 |
| pNF | ENSMUSG000000052305 | Hbb-b1        | 0.767083333 | 1.32E-05 |
| pNF | ENSMUSG000000050534 | Htr5b         | 0.767045455 | 1.56E-05 |
| pNF | ENSMUSG000000037145 | 2210407C18Rik | 0.766287879 | 1.38E-05 |
| pNF | ENSMUSG000000034192 | Lsm3          | 0.766136364 | 1.78E-05 |
| pNF | ENSMUSG000000102215 | Gm2464        | 0.765833333 | 1.84E-05 |
| pNF | ENSMUSG000000030094 | Xpc           | 0.765681818 | 1.88E-05 |
| pNF | ENSMUSG000000020150 | Gamt          | 0.765454545 | 1.95E-05 |
| pNF | ENSMUSG000000105290 | NA            | 0.764924242 | 1.52E-05 |
| pNF | ENSMUSG000000074227 | Spint2        | 0.763863636 | 2.38E-05 |
| pNF | ENSMUSG000000022544 | Eef2kmt       | 0.763863636 | 2.40E-05 |
| pNF | ENSMUSG000000007837 | Prrg2         | 0.76344697  | 2.55E-05 |
| pNF | ENSMUSG000000033318 | Gstt2         | 0.762916667 | 2.50E-05 |
| pNF | ENSMUSG000000046561 | Arsj          | 0.762878788 | 2.04E-05 |
| pNF | ENSMUSG000000030598 | Fbxo17        | 0.76280303  | 2.60E-05 |
| pNF | ENSMUSG000000043342 | Hoxd9         | 0.762424242 | 2.91E-05 |
| pNF | ENSMUSG000000035773 | Kiss1r        | 0.762045455 | 3.01E-05 |
| pNF | ENSMUSG000000024851 | Pitpnm1       | 0.761893939 | 3.14E-05 |
| pNF | ENSMUSG000000041895 | Wipi1         | 0.761515152 | 3.31E-05 |
| pNF | ENSMUSG000000020253 | Ppm1m         | 0.761363636 | 3.24E-05 |
| pNF | ENSMUSG000000034098 | Fstl5         | 0.761287879 | 3.40E-05 |

|     |                    |               |             |             |
|-----|--------------------|---------------|-------------|-------------|
| pNF | ENSMUSG00000038775 | Vill          | 0.760681818 | 2.58E-05    |
| pNF | ENSMUSG00000021265 | Slc25a29      | 0.760606061 | 3.71E-05    |
| pNF | ENSMUSG00000085241 | Snhg3         | 0.760454545 | 3.76E-05    |
| pNF | ENSMUSG00000039208 | Metrl         | 0.760265152 | 3.80E-05    |
| pNF | ENSMUSG00000046167 | Gldn          | 0.760189394 | 3.82E-05    |
| pNF | ENSMUSG00000029333 | Rasgef1b      | 0.759318182 | 4.41E-05    |
| pNF | ENSMUSG00000020733 | Slc9a3r1      | 0.759318182 | 4.42E-05    |
| pNF | ENSMUSG00000006611 | Hfe           | 0.758863636 | 4.57E-05    |
| pNF | ENSMUSG00000074743 | Thbd          | 0.7575      | 5.45E-05    |
| pNF | ENSMUSG00000038524 | Fchsd1        | 0.7575      | 5.62E-05    |
| pNF | ENSMUSG00000028480 | Glpr2         | 0.757121212 | 5.91E-05    |
| pNF | ENSMUSG00000040043 | Rbms2         | 0.75655303  | 6.32E-05    |
| pNF | ENSMUSG00000086454 | Platr14       | 0.756212121 | 6.12E-05    |
| pNF | ENSMUSG00000029545 | Acads         | 0.755492424 | 7.31E-05    |
| pNF | ENSMUSG00000028082 | Sh3d19        | 0.755378788 | 7.43E-05    |
| pNF | ENSMUSG00000000308 | Ckmt1         | 0.75530303  | 7.50E-05    |
| pNF | ENSMUSG00000032172 | Olfm2         | 0.75530303  | 7.46E-05    |
| pNF | ENSMUSG00000007039 | Ddah2         | 0.755151515 | 7.65E-05    |
| pNF | ENSMUSG00000031682 | 1700011L22Rik | 0.754583333 | 7.47E-05    |
| pNF | ENSMUSG00000034107 | Ano7          | 0.754545455 | 7.03E-05    |
| pNF | ENSMUSG00000076441 | Ass1          | 0.754318182 | 8.53E-05    |
| pNF | ENSMUSG00000050321 | Neto1         | 0.753484848 | 7.61E-05    |
| pNF | ENSMUSG00000000753 | Serpinf1      | 0.753333333 | 9.63E-05    |
| pNF | ENSMUSG00000031684 | Slc10a7       | 0.75280303  | 0.000103548 |
| pNF | ENSMUSG00000042826 | Fgf11         | 0.752765152 | 7.96E-05    |
| pNF | ENSMUSG00000074673 | Tll9          | 0.752537879 | 0.000106441 |
| pNF | ENSMUSG00000050671 | lsm2          | 0.752159091 | 9.53E-05    |
| pNF | ENSMUSG00000056144 | Trim34a       | 0.752083333 | 9.46E-05    |
| pNF | ENSMUSG00000020092 | Pald1         | 0.751704545 | 0.00011458  |
| pNF | ENSMUSG00000031952 | Chst5         | 0.750833333 | 9.36E-05    |
| pNF | ENSMUSG00000029171 | Pgm1          | 0.750568182 | 0.000135819 |
| pNF | ENSMUSG00000009876 | Cox4i2        | 0.750378788 | 0.000133864 |
| pNF | ENSMUSG00000042942 | Greb1l        | 0.750151515 | 0.000145256 |
| pNF | ENSMUSG00000029798 | Herc6         | 0.750075758 | 0.000146428 |
| pNF | ENSMUSG00000012443 | Kif11         | 0.749734848 | 0.000147125 |
| pNF | ENSMUSG00000046999 | 1110032F04Rik | 0.74969697  | 0.000153988 |
| pNF | ENSMUSG00000045555 | Mettl24       | 0.749545455 | 0.000120105 |
| pNF | ENSMUSG00000035686 | Thrsp         | 0.749431818 | 0.000125527 |
| pNF | ENSMUSG00000037977 | 6430571L13Rik | 0.749128788 | 0.000158537 |
| pNF | ENSMUSG00000068522 | Aard          | 0.74905303  | 0.000149257 |
| pNF | ENSMUSG00000041153 | Osgin2        | 0.748939394 | 0.000169425 |
| pNF | ENSMUSG00000043460 | Elfn2         | 0.748598485 | 0.000150773 |
| pNF | ENSMUSG00000032198 | Dock6         | 0.748106061 | 0.000180884 |

|     |                    |          |             |             |
|-----|--------------------|----------|-------------|-------------|
| pNF | ENSMUSG00000022678 | Nde1     | 0.74780303  | 0.000185012 |
| pNF | ENSMUSG00000031778 | Cx3cl1   | 0.746287879 | 0.000220009 |
| pNF | ENSMUSG00000003411 | Rab3b    | 0.745984848 | 0.000247233 |
| pNF | ENSMUSG00000034194 | R3hcc1   | 0.745606061 | 0.0002592   |
| pNF | ENSMUSG00000051890 | Klhdc1   | 0.745378788 | 0.000265472 |
| pNF | ENSMUSG00000022665 | Ccdc80   | 0.744393939 | 0.000292095 |
| pNF | ENSMUSG00000049649 | Gpr3     | 0.744280303 | 0.000305013 |
| pNF | ENSMUSG00000000340 | Dbt      | 0.744090909 | 0.000312621 |
| pNF | ENSMUSG00000036615 | Rfxap    | 0.744015152 | 0.000316237 |
| pNF | ENSMUSG00000035504 | Reep6    | 0.743560606 | 0.000270873 |
| pNF | ENSMUSG00000004933 | Matk     | 0.743409091 | 0.000323638 |
| pNF | ENSMUSG00000026638 | Irf6     | 0.7425      | 0.000326256 |
| pNF | ENSMUSG00000026525 | Opn3     | 0.742083333 | 0.000401897 |
| pNF | ENSMUSG00000038244 | Mical2   | 0.742045455 | 0.000403331 |
| pNF | ENSMUSG00000036995 | Asap3    | 0.741931818 | 0.000392221 |
| pNF | ENSMUSG00000033174 | Mgll     | 0.741666667 | 0.000423633 |
| pNF | ENSMUSG00000051502 | Ufsp1    | 0.741439394 | 0.000434942 |
| pNF | ENSMUSG00000006585 | Cdt1     | 0.741287879 | 0.000357    |
| pNF | ENSMUSG00000026433 | Rab29    | 0.741098485 | 0.000442466 |
| pNF | ENSMUSG00000040495 | Chrm4    | 0.741022727 | 0.000436726 |
| pNF | ENSMUSG00000020935 | Dcakd    | 0.740833333 | 0.000468834 |
| pNF | ENSMUSG00000068735 | Trp53i11 | 0.740606061 | 0.000372683 |
| pNF | ENSMUSG00000024430 | Cabyr    | 0.740492424 | 0.000474271 |
| pNF | ENSMUSG00000074925 | Ptar1    | 0.740378788 | 0.000494855 |
| pNF | ENSMUSG00000021647 | Cartpt   | 0.739886364 | 0.000525892 |
| pNF | ENSMUSG00000035228 | Ccdc106  | 0.739734848 | 0.000530313 |
| pNF | ENSMUSG00000070866 | Zfp804a  | 0.739204545 | 0.000560563 |
| pNF | ENSMUSG00000039168 | Dap      | 0.738409091 | 0.000630147 |
| pNF | ENSMUSG00000097059 | NA       | 0.737992424 | 0.000625432 |
| pNF | ENSMUSG00000023328 | Ache     | 0.7375      | 0.000703292 |
| pNF | ENSMUSG00000063018 | NA       | 0.737007576 | 0.00069273  |
| pNF | ENSMUSG00000026259 | Ngef     | 0.736780303 | 0.00069839  |
| pNF | ENSMUSG00000021791 | Dydc2    | 0.73655303  | 0.000731519 |
| pNF | ENSMUSG00000031482 | Slc25a15 | 0.736439394 | 0.000763392 |
| pNF | ENSMUSG00000009376 | Met      | 0.736325758 | 0.00067548  |
| pNF | ENSMUSG00000020814 | Mxra7    | 0.735757576 | 0.000868599 |
| pNF | ENSMUSG00000028523 | Tctex1d1 | 0.73530303  | 0.000870106 |
| pNF | ENSMUSG00000034308 | Sdr42e1  | 0.735113636 | 0.000865494 |
| pNF | ENSMUSG00000039497 | Dse      | 0.734545455 | 0.000988845 |
| pNF | ENSMUSG00000024736 | Tmem132a | 0.732575758 | 0.001266554 |
| pNF | ENSMUSG00000020432 | Tcn2     | 0.732575758 | 0.001265792 |
| pNF | ENSMUSG00000021448 | Shc3     | 0.7325      | 0.001090089 |
| pNF | ENSMUSG00000089685 | NA       | 0.732424242 | 0.000923339 |

|     |                    |               |             |             |
|-----|--------------------|---------------|-------------|-------------|
| pNF | ENSMUSG00000027171 | Prrg4         | 0.73219697  | 0.001080641 |
| pNF | ENSMUSG00000068105 | Tnfrsf13c     | 0.732159091 | 0.001013022 |
| pNF | ENSMUSG00000049866 | Arl4c         | 0.732045455 | 0.001352251 |
| pNF | ENSMUSG00000021668 | Polk          | 0.731893939 | 0.001368121 |
| pNF | ENSMUSG00000002475 | Abhd3         | 0.73155303  | 0.001432237 |
| pNF | ENSMUSG00000054204 | Fam150b       | 0.731363636 | 0.001464833 |
| pNF | ENSMUSG00000038987 | Cfap157       | 0.731136364 | 0.001503957 |
| pNF | ENSMUSG00000049148 | Plcx3         | 0.731060606 | 0.001519859 |
| pNF | ENSMUSG00000027792 | Bche          | 0.730757576 | 0.001560074 |
| pNF | ENSMUSG00000025239 | Limd1         | 0.73        | 0.001684642 |
| pNF | ENSMUSG00000020766 | Galk1         | 0.728787879 | 0.001983349 |
| pNF | ENSMUSG00000073889 | Ii11ra1       | 0.728636364 | 0.002015597 |
| pNF | ENSMUSG00000043843 | Tmem145       | 0.728219697 | 0.002105674 |
| pNF | ENSMUSG00000036158 | Prickle1      | 0.728106061 | 0.001925463 |
| pNF | ENSMUSG00000029552 | Tes           | 0.727765152 | 0.002227096 |
| pNF | ENSMUSG00000064346 | NA            | 0.727234848 | 0.002159239 |
| pNF | ENSMUSG00000014470 | Rnf166        | 0.727234848 | 0.002371766 |
| pNF | ENSMUSG00000073405 | NA            | 0.727007576 | 0.002104646 |
| pNF | ENSMUSG00000097769 | Snhg4         | 0.726515152 | 0.002580348 |
| pNF | ENSMUSG00000086181 | NA            | 0.726363636 | 0.002606823 |
| pNF | ENSMUSG00000035165 | Kcne3         | 0.726060606 | 0.001977587 |
| pNF | ENSMUSG00000031323 | Dmrtc1a       | 0.725454545 | 0.002872719 |
| pNF | ENSMUSG00000033854 | Kcnk10        | 0.72469697  | 0.003153223 |
| pNF | ENSMUSG00000002983 | Relb          | 0.724659091 | 0.003177618 |
| pNF | ENSMUSG00000062526 | Mppe1         | 0.724621212 | 0.003209425 |
| pNF | ENSMUSG00000052430 | Bmpr1b        | 0.724431818 | 0.002934197 |
| pNF | ENSMUSG00000048416 | Mlf1          | 0.724166667 | 0.00337935  |
| pNF | ENSMUSG00000031980 | Agt           | 0.724166667 | 0.002803382 |
| pNF | ENSMUSG00000037752 | Xkr8          | 0.723636364 | 0.003516002 |
| pNF | ENSMUSG00000048699 | 4732456N10Rik | 0.723409091 | 0.003087689 |
| pNF | ENSMUSG00000038990 | Cables2       | 0.723409091 | 0.003666067 |
| pNF | ENSMUSG00000032062 | 2310030G06Rik | 0.723371212 | 0.002934649 |
| pNF | ENSMUSG00000028197 | Col24a1       | 0.723295455 | 0.003462051 |
| pNF | ENSMUSG00000026489 | Adck3         | 0.723181818 | 0.003783506 |
| pNF | ENSMUSG00000032369 | Plscr1        | 0.722840909 | 0.003371327 |
| pNF | ENSMUSG00000029186 | Pi4k2b        | 0.72280303  | 0.003907516 |
| pNF | ENSMUSG00000050963 | Kcns2         | 0.722575758 | 0.003294542 |
| pNF | ENSMUSG00000028078 | Dclk2         | 0.722462121 | 0.004104644 |
| pNF | ENSMUSG00000042228 | Lyn           | 0.722272727 | 0.00398558  |
| pNF | ENSMUSG00000054178 | NA            | 0.722159091 | 0.00398558  |
| pNF | ENSMUSG00000037580 | Gch1          | 0.722121212 | 0.004255937 |
| pNF | ENSMUSG00000032177 | Pde4a         | 0.722121212 | 0.00418573  |
| pNF | ENSMUSG00000034771 | Tle2          | 0.721363636 | 0.004621594 |

|     |                    |               |             |             |
|-----|--------------------|---------------|-------------|-------------|
| pNF | ENSMUSG00000031146 | Plp2          | 0.720606061 | 0.005021754 |
| pNF | ENSMUSG00000034825 | Nrip3         | 0.720378788 | 0.005198098 |
| pNF | ENSMUSG00000008318 | Relt          | 0.720113636 | 0.005176707 |
| pNF | ENSMUSG00000022676 | Snai2         | 0.720075758 | 0.003815927 |
| pNF | ENSMUSG00000048782 | Insc          | 0.719659091 | 0.005602207 |
| pNF | ENSMUSG00000038180 | Spag4         | 0.719545455 | 0.005617517 |
| pNF | ENSMUSG00000001901 | Kcnh6         | 0.719318182 | 0.005854377 |
| pNF | ENSMUSG00000032377 | Plscr4        | 0.719090909 | 0.005915123 |
| pNF | ENSMUSG00000079414 | Gm11110       | 0.718939394 | 0.004584102 |
| pNF | ENSMUSG00000060268 | Gm1661        | 0.718825758 | 0.005565794 |
| pNF | ENSMUSG00000020363 | Gfpt2         | 0.717992424 | 0.006255816 |
| pNF | ENSMUSG00000028494 | Plin2         | 0.717575758 | 0.007120319 |
| pNF | ENSMUSG00000040118 | Cacna2d1      | 0.716590909 | 0.007943907 |
| pNF | ENSMUSG00000038550 | Ciart         | 0.715909091 | 0.008085525 |
| pNF | ENSMUSG00000042340 | Ctf1          | 0.715909091 | 0.006680123 |
| pNF | ENSMUSG00000034265 | Zdhhc14       | 0.715643939 | 0.008801949 |
| pNF | ENSMUSG00000092274 | NA            | 0.715113636 | 0.009266055 |
| pNF | ENSMUSG00000010660 | Plcd1         | 0.713333333 | 0.01132856  |
| pNF | ENSMUSG00000032194 | Kank2         | 0.713106061 | 0.010450141 |
| pNF | ENSMUSG00000021303 | Gng4          | 0.7125      | 0.012378388 |
| pNF | ENSMUSG00000046750 | BC089491      | 0.711856061 | 0.010078588 |
| pNF | ENSMUSG00000024892 | Pcx           | 0.711818182 | 0.013357981 |
| pNF | ENSMUSG00000057176 | Ccdc189       | 0.711666667 | 0.012601439 |
| pNF | ENSMUSG00000002835 | Chaf1a        | 0.711666667 | 0.012936094 |
| pNF | ENSMUSG00000070802 | Pnmal2        | 0.711590909 | 0.013630603 |
| pNF | ENSMUSG00000024855 | Pacs1         | 0.710795455 | 0.014886769 |
| pNF | ENSMUSG00000051648 | Kctd19        | 0.710643939 | 0.01282887  |
| pNF | ENSMUSG00000003623 | Crot          | 0.71030303  | 0.015728624 |
| pNF | ENSMUSG00000021906 | Oxnad1        | 0.709924242 | 0.016239234 |
| pNF | ENSMUSG00000027459 | Fam110a       | 0.709924242 | 0.015562656 |
| pNF | ENSMUSG00000051998 | Lax1          | 0.709886364 | 0.015688292 |
| pNF | ENSMUSG00000074466 | Gm15417       | 0.709772727 | 0.016510923 |
| pNF | ENSMUSG00000086855 | NA            | 0.709734848 | 0.015940822 |
| pNF | ENSMUSG00000030030 | 1700003E16Rik | 0.70969697  | 0.016777145 |
| pNF | ENSMUSG00000046814 | Gchfr         | 0.709659091 | 0.016379436 |
| pNF | ENSMUSG00000070469 | Adamtsl3      | 0.709242424 | 0.017491459 |
| pNF | ENSMUSG00000045316 | Fahd1         | 0.709242424 | 0.017603956 |
| pNF | ENSMUSG00000036251 | Trpm8         | 0.709128788 | 0.016236002 |
| pNF | ENSMUSG00000090272 | Mndal         | 0.709015152 | 0.016491012 |
| pNF | ENSMUSG00000051341 | Zfp52         | 0.708522727 | 0.018796846 |
| pNF | ENSMUSG00000024906 | Mus81         | 0.708333333 | 0.01933937  |
| pNF | ENSMUSG00000026980 | Ly75          | 0.7075      | 0.02112513  |
| pNF | ENSMUSG00000031239 | Itm2a         | 0.7075      | 0.020675696 |



|      |                    |               |             |             |
|------|--------------------|---------------|-------------|-------------|
| pNF  | ENSMUSG00000022453 | Naga          | 0.70719697  | 0.02187552  |
| pNF  | ENSMUSG00000038393 | Txnip         | 0.705492424 | 0.023820333 |
| pNF  | ENSMUSG00000030096 | Slc6a6        | 0.705378788 | 0.026473737 |
| pNF  | ENSMUSG00000039620 | 6430573F11Rik | 0.705378788 | 0.02619958  |
| pNF  | ENSMUSG00000033214 | Slitrk5       | 0.705075758 | 0.027218015 |
| pNF  | ENSMUSG00000026295 | Spp2          | 0.704128788 | 0.024518098 |
| pNF  | ENSMUSG00000086910 | NA            | 0.703787879 | 0.024588295 |
| pNF  | ENSMUSG00000013155 | Enkd1         | 0.703674242 | 0.031180255 |
| pNF  | ENSMUSG00000039131 | Gipc2         | 0.703143939 | 0.032756637 |
| pNF  | ENSMUSG00000020828 | Pld2          | 0.703030303 | 0.033372421 |
| pNF  | ENSMUSG00000040690 | Col16a1       | 0.702840909 | 0.032528981 |
| pNF  | ENSMUSG00000035637 | Grhpr         | 0.70280303  | 0.034374962 |
| pNF  | ENSMUSG00000030792 | Dkk1          | 0.702689394 | 0.026275367 |
| pNF  | ENSMUSG00000035834 | Polr3g        | 0.7025      | 0.035708551 |
| pNF  | ENSMUSG00000028865 | Cd164l2       | 0.702348485 | 0.03600464  |
| pNF  | ENSMUSG00000097666 | NA            | 0.701969697 | 0.030531393 |
| pNF  | ENSMUSG00000040219 | Ttc12         | 0.700454545 | 0.043717496 |
| pNF  | ENSMUSG00000050967 | Creg2         | 0.699962121 | 0.038912869 |
| pNF  | ENSMUSG00000053040 | Aph1c         | 0.699734848 | 0.046923824 |
| pNF  | ENSMUSG00000064344 | NA            | 0.699431818 | 0.048878835 |
| pNF  | ENSMUSG00000048747 | NA            | 0.698030303 | 0.049164781 |
| mNFb | ENSMUSG00000022231 | Sema5a        | 0.92843201  | 5.42E-19    |
| mNFb | ENSMUSG00000026452 | Syt2          | 0.913540085 | 1.75E-17    |
| mNFb | ENSMUSG00000059187 | Fam19a1       | 0.898503578 | 2.36E-16    |
| mNFb | ENSMUSG00000025582 | Nptx1         | 0.893226343 | 1.24E-15    |
| mNFb | ENSMUSG00000071340 | Trappc3l      | 0.892069688 | 1.77E-15    |
| mNFb | ENSMUSG00000025867 | Cplx2         | 0.888888889 | 3.55E-15    |
| mNFb | ENSMUSG00000048251 | Bcl11b        | 0.886792453 | 3.76E-15    |
| mNFb | ENSMUSG00000053007 | Creb5         | 0.878732018 | 1.77E-14    |
| mNFb | ENSMUSG00000067586 | S1pr3         | 0.878334418 | 3.06E-14    |
| mNFb | ENSMUSG00000044734 | Serpib1a      | 0.868611292 | 1.86E-13    |
| mNFb | ENSMUSG00000027217 | Tspan18       | 0.868502855 | 2.06E-13    |
| mNFb | ENSMUSG00000032667 | Pon2          | 0.864490711 | 4.55E-13    |
| mNFb | ENSMUSG00000064225 | Paqr9         | 0.862538856 | 5.95E-13    |
| mNFb | ENSMUSG00000052726 | Kcnt2         | 0.858996602 | 6.95E-13    |
| mNFb | ENSMUSG00000015354 | Pcolce2       | 0.85877973  | 1.28E-12    |
| mNFb | ENSMUSG00000042312 | S100a13       | 0.858526711 | 1.50E-12    |
| mNFb | ENSMUSG00000031565 | Fgfr1         | 0.857370057 | 1.87E-12    |
| mNFb | ENSMUSG00000032232 | Cgnl1         | 0.857080894 | 1.73E-12    |
| mNFb | ENSMUSG00000024497 | Pou4f3        | 0.854225403 | 3.33E-12    |
| mNFb | ENSMUSG00000006205 | Htra1         | 0.854189258 | 3.38E-12    |
| mNFb | ENSMUSG00000045625 | Pigz          | 0.853972385 | 3.55E-12    |
| mNFb | ENSMUSG00000021190 | Lgmn          | 0.853972385 | 3.56E-12    |

|      |                    |          |             |          |
|------|--------------------|----------|-------------|----------|
| mNFb | ENSMUSG00000059325 | Hopx     | 0.846490277 | 1.29E-11 |
| mNFb | ENSMUSG00000096956 | Snhg18   | 0.845369768 | 1.33E-11 |
| mNFb | ENSMUSG00000028161 | Ppp3ca   | 0.844791441 | 1.97E-11 |
| mNFb | ENSMUSG00000031906 | Smpd3    | 0.843237186 | 2.62E-11 |
| mNFb | ENSMUSG00000017446 | C1qtnf1  | 0.840309405 | 4.45E-11 |
| mNFb | ENSMUSG00000042834 | Nrep     | 0.836550278 | 8.81E-11 |
| mNFb | ENSMUSG00000017412 | Cacnb4   | 0.835682788 | 1.03E-10 |
| mNFb | ENSMUSG00000041565 | L3mbtl4  | 0.83430926  | 8.54E-11 |
| mNFb | ENSMUSG00000021730 | Hcn1     | 0.834164679 | 1.34E-10 |
| mNFb | ENSMUSG00000106019 | NA       | 0.832899588 | 1.32E-10 |
| mNFb | ENSMUSG00000008540 | Mgst1    | 0.831309188 | 1.89E-10 |
| mNFb | ENSMUSG00000029802 | Abcg2    | 0.830405552 | 2.60E-10 |
| mNFb | ENSMUSG00000040138 | Ndp      | 0.830297116 | 2.35E-10 |
| mNFb | ENSMUSG00000029869 | Ephb6    | 0.828706716 | 3.31E-10 |
| mNFb | ENSMUSG00000036578 | Fxyd7    | 0.824983735 | 6.81E-10 |
| mNFb | ENSMUSG00000028864 | Hgf      | 0.824369262 | 6.06E-10 |
| mNFb | ENSMUSG00000032698 | Lmo2     | 0.82382708  | 5.65E-10 |
| mNFb | ENSMUSG00000052934 | Fbxo31   | 0.822670426 | 1.02E-09 |
| mNFb | ENSMUSG00000047821 | Trim16   | 0.822525844 | 9.77E-10 |
| mNFb | ENSMUSG00000052534 | Pbx1     | 0.821802935 | 1.18E-09 |
| mNFb | ENSMUSG00000038894 | Irs2     | 0.81818839  | 2.19E-09 |
| mNFb | ENSMUSG00000020431 | Adcy1    | 0.816236536 | 2.17E-09 |
| mNFb | ENSMUSG00000050558 | Prokr2   | 0.815911227 | 2.14E-09 |
| mNFb | ENSMUSG00000074457 | S100a16  | 0.814465409 | 3.62E-09 |
| mNFb | ENSMUSG00000031749 | St3gal2  | 0.813850936 | 4.54E-09 |
| mNFb | ENSMUSG00000032243 | Itga11   | 0.813489482 | 3.77E-09 |
| mNFb | ENSMUSG00000034684 | Sema3f   | 0.812694282 | 4.07E-09 |
| mNFb | ENSMUSG00000018417 | Myo1b    | 0.810923155 | 7.39E-09 |
| mNFb | ENSMUSG00000100426 | NA       | 0.810597846 | 4.61E-09 |
| mNFb | ENSMUSG00000019889 | Ptprk    | 0.809947228 | 5.15E-09 |
| mNFb | ENSMUSG00000038700 | Hoxb5    | 0.809007446 | 8.73E-09 |
| mNFb | ENSMUSG00000028565 | Nfia     | 0.806477265 | 1.54E-08 |
| mNFb | ENSMUSG00000045288 | Ush1g    | 0.805031447 | 1.56E-08 |
| mNFb | ENSMUSG00000001773 | Folh1    | 0.803404901 | 2.17E-08 |
| mNFb | ENSMUSG00000005268 | Prlr     | 0.802790429 | 2.09E-08 |
| mNFb | ENSMUSG00000086712 | AI427809 | 0.802428974 | 2.01E-08 |
| mNFb | ENSMUSG00000037712 | Fermt2   | 0.801200029 | 3.65E-08 |
| mNFb | ENSMUSG00000016918 | Sulf1    | 0.79928432  | 4.96E-08 |
| mNFb | ENSMUSG00000078247 | Airn     | 0.798959011 | 4.74E-08 |
| mNFb | ENSMUSG00000095407 | Tmem200c | 0.796717993 | 5.40E-08 |
| mNFb | ENSMUSG00000024553 | Galr1    | 0.795669775 | 7.55E-08 |
| mNFb | ENSMUSG00000021708 | NA       | 0.793826357 | 1.13E-07 |
| mNFb | ENSMUSG00000007030 | Vwa7     | 0.793754066 | 1.19E-07 |

|      |                    |               |             |          |
|------|--------------------|---------------|-------------|----------|
| mNFb | ENSMUSG00000050587 | Lrrc4c        | 0.792525121 | 1.42E-07 |
| mNFb | ENSMUSG00000025969 | Nrp2          | 0.790717849 | 1.92E-07 |
| mNFb | ENSMUSG00000063594 | Gng8          | 0.789633485 | 2.26E-07 |
| mNFb | ENSMUSG00000026315 | Serpib8       | 0.787862358 | 2.95E-07 |
| mNFb | ENSMUSG00000071537 | Klrg2         | 0.787067158 | 3.07E-07 |
| mNFb | ENSMUSG00000075254 | Heg1          | 0.786488831 | 3.57E-07 |
| mNFb | ENSMUSG00000074274 | D930028M14Rik | 0.784717704 | 4.49E-07 |
| mNFb | ENSMUSG00000075408 | 6030408B16Rik | 0.784645413 | 2.82E-07 |
| mNFb | ENSMUSG00000071379 | Hpcal1        | 0.784067086 | 5.35E-07 |
| mNFb | ENSMUSG00000049001 | Ndnf          | 0.782259813 | 4.92E-07 |
| mNFb | ENSMUSG00000048458 | Fam212b       | 0.782079086 | 6.80E-07 |
| mNFb | ENSMUSG00000009216 | Fam163b       | 0.780488686 | 6.05E-07 |
| mNFb | ENSMUSG00000041607 | Mbp           | 0.778934432 | 1.15E-06 |
| mNFb | ENSMUSG00000026737 | Pip4k2a       | 0.77878985  | 1.18E-06 |
| mNFb | ENSMUSG00000079598 | Clec2l        | 0.77878985  | 1.18E-06 |
| mNFb | ENSMUSG00000052949 | Rnf157        | 0.777488614 | 1.43E-06 |
| mNFb | ENSMUSG00000001663 | Gstt1         | 0.777416323 | 1.42E-06 |
| mNFb | ENSMUSG00000031129 | Slc9a9        | 0.774886142 | 2.11E-06 |
| mNFb | ENSMUSG00000042831 | Alkbh6        | 0.774090942 | 2.37E-06 |
| mNFb | ENSMUSG00000046157 | Tmem229b      | 0.771127015 | 3.64E-06 |
| mNFb | ENSMUSG00000024998 | Plce1         | 0.770151088 | 4.07E-06 |
| mNFb | ENSMUSG00000050199 | Lgr4          | 0.76950047  | 4.59E-06 |
| mNFb | ENSMUSG00000028755 | Cda           | 0.768560688 | 5.28E-06 |
| mNFb | ENSMUSG00000030865 | Chp2          | 0.767837779 | 4.53E-06 |
| mNFb | ENSMUSG00000035735 | Dagla         | 0.766066652 | 7.53E-06 |
| mNFb | ENSMUSG00000027534 | Snx16         | 0.763247307 | 1.12E-05 |
| mNFb | ENSMUSG00000041020 | Map7d2        | 0.762741271 | 1.21E-05 |
| mNFb | ENSMUSG00000027351 | Spred1        | 0.762741271 | 1.21E-05 |
| mNFb | ENSMUSG00000085517 | NA            | 0.762415962 | 9.60E-06 |
| mNFb | ENSMUSG00000043017 | Ptgir         | 0.761946071 | 1.35E-05 |
| mNFb | ENSMUSG00000106644 | NA            | 0.759668908 | 1.16E-05 |
| mNFb | ENSMUSG00000021337 | Scgn          | 0.758837562 | 1.93E-05 |
| mNFb | ENSMUSG00000097313 | NA            | 0.758150799 | 2.03E-05 |
| mNFb | ENSMUSG00000050896 | Rtn4rl2       | 0.757897781 | 2.15E-05 |
| mNFb | ENSMUSG00000030042 | Pole4         | 0.756668835 | 2.80E-05 |
| mNFb | ENSMUSG00000026674 | Ddr2          | 0.756596544 | 2.61E-05 |
| mNFb | ENSMUSG00000043850 | Clrn1         | 0.754933854 | 2.38E-05 |
| mNFb | ENSMUSG00000031101 | Sash3         | 0.754391672 | 2.64E-05 |
| mNFb | ENSMUSG00000032860 | P2ry2         | 0.75384949  | 3.56E-05 |
| mNFb | ENSMUSG00000037406 | Htra4         | 0.752114509 | 4.04E-05 |
| mNFb | ENSMUSG00000026514 | Cnih3         | 0.7513916   | 5.62E-05 |
| mNFb | ENSMUSG00000009075 | Cabp7         | 0.751030145 | 3.97E-05 |
| mNFb | ENSMUSG00000005994 | Tyrp1         | 0.749728909 | 5.98E-05 |

|      |                     |               |             |             |
|------|---------------------|---------------|-------------|-------------|
| mNFb | ENSMUSG00000047040  | Prr15l        | 0.749439746 | 5.54E-05    |
| mNFb | ENSMUSG00000019891  | Dcbld1        | 0.748427673 | 8.53E-05    |
| mNFb | ENSMUSG00000020614  | Fam20a        | 0.747740909 | 9.11E-05    |
| mNFb | ENSMUSG000000105974 | NA            | 0.746764982 | 7.60E-05    |
| mNFb | ENSMUSG00000049521  | Cdc42ep1      | 0.746439673 | 8.79E-05    |
| mNFb | ENSMUSG00000041417  | Pik3r1        | 0.745680619 | 0.000122719 |
| mNFb | ENSMUSG00000057816  | 1700007G11Rik | 0.745572182 | 9.67E-05    |
| mNFb | ENSMUSG00000025931  | Paqr8         | 0.745102292 | 0.000132376 |
| mNFb | ENSMUSG00000022098  | Bmp1          | 0.744668546 | 0.000113696 |
| mNFb | ENSMUSG00000020823  | Sec14l1       | 0.742933565 | 0.000175623 |
| mNFb | ENSMUSG000000106321 | NA            | 0.742861274 | 0.000138747 |
| mNFb | ENSMUSG00000042581  | Thsd7b        | 0.742427528 | 0.000170477 |
| mNFb | ENSMUSG00000038295  | Atg9b         | 0.742029928 | 0.000164305 |
| mNFb | ENSMUSG00000027999  | Pla2g12a      | 0.741198583 | 0.000219891 |
| mNFb | ENSMUSG00000020900  | Myh10         | 0.738234656 | 0.000321109 |
| mNFb | ENSMUSG00000049336  | Tenm2         | 0.737692475 | 0.000341698 |
| mNFb | ENSMUSG00000025887  | Casp12        | 0.737403311 | 0.000339213 |
| mNFb | ENSMUSG00000023047  | Amhr2         | 0.737150293 | 0.000319283 |
| mNFb | ENSMUSG00000047881  | Rell1         | 0.735126148 | 0.000464415 |
| mNFb | ENSMUSG00000007944  | Ttc9b         | 0.734692402 | 0.000502816 |
| mNFb | ENSMUSG00000042271  | Nxt2          | 0.73407793  | 0.000543019 |
| mNFb | ENSMUSG00000062098  | Btbd3         | 0.733391166 | 0.000591711 |
| mNFb | ENSMUSG00000028033  | Kcnq5         | 0.732270657 | 0.000669028 |
| mNFb | ENSMUSG00000052125  | F730043M19Rik | 0.730644112 | 0.000748414 |
| mNFb | ENSMUSG00000040483  | Xaf1          | 0.72970433  | 0.000932971 |
| mNFb | ENSMUSG00000034463  | Scara3        | 0.728583821 | 0.000822035 |
| mNFb | ENSMUSG00000068037  | Mas1          | 0.726776549 | 0.001028885 |
| mNFb | ENSMUSG00000019947  | Arid5b        | 0.72565604  | 0.001523777 |
| mNFb | ENSMUSG00000094002  | Gm9866        | 0.724680113 | 0.001670475 |
| mNFb | ENSMUSG00000045201  | Lrrc3b        | 0.723451167 | 0.001993353 |
| mNFb | ENSMUSG00000031628  | Casp3         | 0.722764404 | 0.00216104  |
| mNFb | ENSMUSG00000031827  | Cotl1         | 0.721933059 | 0.002234482 |
| mNFb | ENSMUSG00000029561  | Oasl2         | 0.721571604 | 0.002495434 |
| mNFb | ENSMUSG00000069662  | Marcks        | 0.721463168 | 0.002525088 |
| mNFb | ENSMUSG00000050947  | Amigo1        | 0.721318586 | 0.002570917 |
| mNFb | ENSMUSG00000052155  | Acvr2a        | 0.720740259 | 0.002751699 |
| mNFb | ENSMUSG00000006411  | Pvrl4         | 0.720053495 | 0.002915629 |
| mNFb | ENSMUSG00000031659  | Adcy7         | 0.719583604 | 0.002956371 |
| mNFb | ENSMUSG000000104938 | NA            | 0.719186004 | 0.002945928 |
| mNFb | ENSMUSG00000026031  | Cflar         | 0.718499241 | 0.003577759 |
| mNFb | ENSMUSG00000022075  | Rhobtb2       | 0.717125714 | 0.004192084 |
| mNFb | ENSMUSG00000019737  | Syne4         | 0.717017278 | 0.003594351 |
| mNFb | ENSMUSG00000032024  | Clmp          | 0.716330514 | 0.004590541 |

|      |                    |               |             |             |
|------|--------------------|---------------|-------------|-------------|
| mNFb | ENSMUSG00000032060 | Cryab         | 0.715969059 | 0.00475975  |
| mNFb | ENSMUSG00000038776 | Ephx1         | 0.715896769 | 0.004837161 |
| mNFb | ENSMUSG00000019856 | Fam184a       | 0.715463023 | 0.00490431  |
| mNFb | ENSMUSG00000049686 | Orai1         | 0.715246151 | 0.005207507 |
| mNFb | ENSMUSG00000085042 | Abhd11os      | 0.714342514 | 0.005032651 |
| mNFb | ENSMUSG00000043259 | Fam13c        | 0.712860551 | 0.006846476 |
| mNFb | ENSMUSG00000081433 | NA            | 0.712246078 | 0.005975907 |
| mNFb | ENSMUSG00000027630 | Tbl1xr1       | 0.712065351 | 0.00751373  |
| mNFb | ENSMUSG00000054364 | Rhob          | 0.710872551 | 0.008599528 |
| mNFb | ENSMUSG00000030806 | Stx1b         | 0.710764115 | 0.008699611 |
| mNFb | ENSMUSG00000032462 | Pik3cb        | 0.710077351 | 0.009388643 |
| mNFb | ENSMUSG00000086363 | A330102110Rik | 0.70960746  | 0.009898912 |
| mNFb | ENSMUSG00000040253 | Gbp7          | 0.708884551 | 0.010732846 |
| mNFb | ENSMUSG00000029765 | Plxna4        | 0.708595388 | 0.011092742 |
| mNFb | ENSMUSG00000097125 | NA            | 0.708559242 | 0.009039778 |
| mNFb | ENSMUSG00000026213 | Stk11ip       | 0.707908624 | 0.011977618 |
| mNFb | ENSMUSG00000024588 | Fech          | 0.707836333 | 0.012076018 |
| mNFb | ENSMUSG00000027074 | Slc43a3       | 0.707511024 | 0.012159546 |
| mNFb | ENSMUSG00000026826 | Nr4a2         | 0.706390515 | 0.013695101 |
| mNFb | ENSMUSG00000031596 | Slc7a2        | 0.705306152 | 0.015314021 |
| mNFb | ENSMUSG00000038192 | Cer1          | 0.705233861 | 0.013678697 |
| mNFb | ENSMUSG00000071547 | Nt5dc2        | 0.705233861 | 0.012399699 |
| mNFb | ENSMUSG00000029249 | Rest          | 0.704149498 | 0.017321522 |
| mNFb | ENSMUSG00000020108 | Ddit4         | 0.704041061 | 0.018297383 |
| mNFb | ENSMUSG00000028967 | Errfi1        | 0.703860334 | 0.018670293 |
| mNFb | ENSMUSG00000054733 | Msra          | 0.703571117 | 0.019196159 |
| mNFb | ENSMUSG00000031133 | Arhgef6       | 0.703462734 | 0.019477702 |
| mNFb | ENSMUSG00000031284 | Pak3          | 0.703390443 | 0.019648368 |
| mNFb | ENSMUSG00000029167 | Ppargc1a      | 0.702378371 | 0.021786299 |
| mNFb | ENSMUSG00000050730 | Arhgap42      | 0.701655462 | 0.023677461 |
| mNFb | ENSMUSG00000071753 | C230004F18Rik | 0.701257862 | 0.024756055 |
| mNFb | ENSMUSG00000071637 | NA            | 0.700968698 | 0.025478441 |
| mNFb | ENSMUSG00000096257 | Ccer2         | 0.699812044 | 0.022103998 |
| mNFb | ENSMUSG00000028708 | Mknk1         | 0.699378298 | 0.030286342 |
| mNFb | ENSMUSG00000037010 | Apln          | 0.699342153 | 0.027793808 |
| mNFb | ENSMUSG00000033420 | Antxr1        | 0.698908407 | 0.030765462 |
| mNFb | ENSMUSG00000020282 | Rhbdf1        | 0.698583098 | 0.031649003 |
| mNFb | ENSMUSG00000086605 | NA            | 0.698510807 | 0.03315932  |
| mNFb | ENSMUSG00000031775 | Plp           | 0.696811971 | 0.03672624  |
| mNFb | ENSMUSG00000027457 | Snph          | 0.69673968  | 0.040018553 |
| mNFb | ENSMUSG00000025938 | Slco5a1       | 0.696703535 | 0.039683297 |
| mNFb | ENSMUSG00000024771 | Lipk          | 0.696631244 | 0.035434771 |
| mNFb | ENSMUSG00000029449 | Rhof          | 0.696522808 | 0.040941382 |

|       |                    |               |             |             |
|-------|--------------------|---------------|-------------|-------------|
| mNFb  | ENSMUSG00000030922 | Lymr1         | 0.694932408 | 0.048418475 |
| mNFb  | ENSMUSG00000041308 | Sntb2         | 0.694643244 | 0.049821645 |
| mNFb  | ENSMUSG00000083355 | NA            | 0.694462517 | 0.040165107 |
| mPEPa | ENSMUSG00000022342 | Kcnv1         | 0.929152149 | 1.19E-09    |
| mPEPa | ENSMUSG00000038370 | Pcp4l1        | 0.926054975 | 1.78E-09    |
| mPEPa | ENSMUSG00000049946 | BC030500      | 0.914698671 | 3.87E-09    |
| mPEPa | ENSMUSG00000029281 | Smr2          | 0.899019228 | 2.68E-08    |
| mPEPa | ENSMUSG00000058057 | Mettl7a3      | 0.892115112 | 1.24E-07    |
| mPEPa | ENSMUSG00000028073 | Pear1         | 0.883662408 | 2.57E-07    |
| mPEPa | ENSMUSG00000105807 | NA            | 0.869725126 | 8.39E-07    |
| mPEPa | ENSMUSG00000025576 | Rbfox3        | 0.856884759 | 6.50E-06    |
| mPEPa | ENSMUSG00000021721 | Htr1a         | 0.844367015 | 1.66E-05    |
| mPEPa | ENSMUSG00000041831 | Sytl3         | 0.840366499 | 3.64E-05    |
| mPEPa | ENSMUSG00000057715 | A830018L16Rik | 0.838946961 | 4.21E-05    |
| mPEPa | ENSMUSG00000053519 | Kcnip1        | 0.835527165 | 5.73E-05    |
| mPEPa | ENSMUSG00000038276 | Asic3         | 0.828881146 | 9.28E-05    |
| mPEPa | ENSMUSG00000037628 | Cdkn3         | 0.825267776 | 0.000164299 |
| mPEPa | ENSMUSG00000035547 | Capn5         | 0.821783456 | 0.000230651 |
| mPEPa | ENSMUSG00000027858 | Tspan2        | 0.820492967 | 0.000261353 |
| mPEPa | ENSMUSG00000037318 | Traf3ip3      | 0.8195251   | 0.000274506 |
| mPEPa | ENSMUSG00000020519 | Sap30l        | 0.815718157 | 0.000412268 |
| mPEPa | ENSMUSG00000028072 | Ntrk1         | 0.815201962 | 0.000432424 |
| mPEPa | ENSMUSG00000020186 | Csrp2         | 0.815201962 | 0.000432613 |
| mPEPa | ENSMUSG00000027499 | Pkia          | 0.814556717 | 0.000459789 |
| mPEPa | ENSMUSG00000069135 | Fgfr1op       | 0.814298619 | 0.000470754 |
| mPEPa | ENSMUSG00000030525 | Chrna7        | 0.813459801 | 0.000465275 |
| mPEPa | ENSMUSG00000054162 | Spock3        | 0.81300813  | 0.000530716 |
| mPEPa | ENSMUSG00000041544 | Ptchd2        | 0.808362369 | 0.000768185 |
| mPEPa | ENSMUSG00000022951 | Rcan1         | 0.80707188  | 0.000921504 |
| mPEPa | ENSMUSG00000059456 | Ptk2b         | 0.805781391 | 0.000903412 |
| mPEPa | ENSMUSG00000070476 | Fam217b       | 0.804232804 | 0.001194454 |
| mPEPa | ENSMUSG00000029245 | Epha5         | 0.803329462 | 0.001292874 |
| mPEPa | ENSMUSG00000105576 | NA            | 0.803264937 | 0.000917443 |
| mPEPa | ENSMUSG00000004151 | Etv1          | 0.800813008 | 0.00162361  |
| mPEPa | ENSMUSG00000052302 | Tbc1d30       | 0.800103239 | 0.001737531 |
| mPEPa | ENSMUSG00000036181 | Hist1h1c      | 0.799845141 | 0.001778713 |
| mPEPa | ENSMUSG00000018909 | Arrb1         | 0.799199897 | 0.001885258 |
| mPEPa | ENSMUSG00000049511 | Htr1b         | 0.798877274 | 0.001894842 |
| mPEPa | ENSMUSG00000045519 | Zfp560        | 0.796877016 | 0.002319645 |
| mPEPa | ENSMUSG00000022237 | Ankrd33b      | 0.795973674 | 0.001983349 |
| mPEPa | ENSMUSG00000031937 | Vstm5         | 0.795586527 | 0.002600857 |
| mPEPa | ENSMUSG00000066720 | Cldn9         | 0.787972642 | 0.003817242 |
| mPEPa | ENSMUSG00000050663 | Trhde         | 0.787650019 | 0.004298709 |

|       |                    |          |             |             |
|-------|--------------------|----------|-------------|-------------|
| mPEPa | ENSMUSG00000022257 | Laptm4b  | 0.78577881  | 0.006104094 |
| mPEPa | ENSMUSG00000106065 | NA       | 0.784746419 | 0.004585465 |
| mPEPa | ENSMUSG00000037653 | Kctd8    | 0.78461737  | 0.006745409 |
| mPEPa | ENSMUSG00000015882 | Lcorl    | 0.783843077 | 0.007207972 |
| mPEPa | ENSMUSG00000037553 | Zdhhc18  | 0.782810685 | 0.007870996 |
| mPEPa | ENSMUSG00000037705 | Tecta    | 0.781971867 | 0.008368959 |
| mPEPa | ENSMUSG00000030323 | lft122   | 0.779971609 | 0.009993869 |
| mPEPa | ENSMUSG00000025723 | Nmb      | 0.779455414 | 0.010432782 |
| mPEPa | ENSMUSG00000030653 | Pde2a    | 0.776229191 | 0.013639833 |
| mPEPa | ENSMUSG00000025408 | Ddit3    | 0.775842044 | 0.014084011 |
| mPEPa | ENSMUSG00000075232 | Amd1     | 0.772873919 | 0.017952054 |
| mPEPa | ENSMUSG00000027994 | Ccdc109b | 0.772486772 | 0.018523616 |
| mPEPa | ENSMUSG00000022656 | Pvrl3    | 0.772099626 | 0.019116024 |
| mPEPa | ENSMUSG00000008575 | Nfib     | 0.771454381 | 0.020125272 |
| mPEPa | ENSMUSG00000051177 | Plcb1    | 0.76926055  | 0.024067148 |
| mPEPa | ENSMUSG00000029651 | Mtus2    | 0.76809911  | 0.026427035 |
| mPEPa | ENSMUSG00000096025 | NA       | 0.766421474 | 0.030251977 |
| mPEPa | ENSMUSG00000039717 | Raly1    | 0.766034327 | 0.031180255 |
| mPEPa | ENSMUSG00000078713 | Tomm5    | 0.765776229 | 0.031817942 |
| mPEPa | ENSMUSG00000042743 | Sgtb     | 0.765776229 | 0.031817942 |
| mPEPa | ENSMUSG00000019464 | Ptger1   | 0.765518131 | 0.032466543 |
| mPEPa | ENSMUSG00000021596 | Mctp1    | 0.765260034 | 0.03055283  |
| mPEPa | ENSMUSG00000021640 | Naip1    | 0.764679313 | 0.030352616 |
| mPEPa | ENSMUSG00000021071 | Trim9    | 0.763711447 | 0.037433377 |
| mPEPa | ENSMUSG00000024059 | Clip4    | 0.762550006 | 0.041057851 |
| mPEPa | ENSMUSG00000028226 | Mmp16    | 0.761388566 | 0.045006755 |
| mPEPa | ENSMUSG00000031202 | Rab39b   | 0.760485224 | 0.048353749 |
| mPEPa | ENSMUSG00000039323 | Igfbp2   | 0.759839979 | 0.048557868 |
| mNP   | ENSMUSG00000067714 | Lpar5    | 1           | 2.52E-07    |
| mNP   | ENSMUSG00000069372 | Ctxn3    | 1           | 3.10E-07    |
| mNP   | ENSMUSG00000026322 | Htr4     | 0.999777035 | 3.23E-07    |
| mNP   | ENSMUSG00000041737 | Tmem45b  | 0.999331104 | 3.74E-07    |
| mNP   | ENSMUSG00000023903 | Mmp25    | 0.998885173 | 3.45E-07    |
| mNP   | ENSMUSG00000009378 | Slc16a12 | 0.998885173 | 3.09E-07    |
| mNP   | ENSMUSG00000025221 | Kcnip2   | 0.998662207 | 4.19E-07    |
| mNP   | ENSMUSG00000027716 | Trpc3    | 0.998439242 | 4.87E-07    |
| mNP   | ENSMUSG00000087014 | NA       | 0.997993311 | 3.70E-07    |
| mNP   | ENSMUSG00000056296 | Synpr    | 0.997993311 | 5.58E-07    |
| mNP   | ENSMUSG00000054920 | Kihl5    | 0.997770346 | 5.42E-07    |
| mNP   | ENSMUSG00000093502 | NA       | 0.996432553 | 5.96E-07    |
| mNP   | ENSMUSG00000038903 | Ccdc68   | 0.995986622 | 3.47E-07    |
| mNP   | ENSMUSG00000028794 | A3galt2  | 0.99509476  | 6.91E-07    |
| mNP   | ENSMUSG00000099560 | NA       | 0.99509476  | 5.56E-07    |

|     |                    |          |             |          |
|-----|--------------------|----------|-------------|----------|
| mNP | ENSMUSG00000032561 | Acpp     | 0.994202899 | 7.89E-07 |
| mNP | ENSMUSG00000022935 | Grik1    | 0.993756968 | 7.67E-07 |
| mNP | ENSMUSG00000031997 | Trpc6    | 0.993534002 | 7.81E-07 |
| mNP | ENSMUSG00000032278 | Paqr5    | 0.993311037 | 7.94E-07 |
| mNP | ENSMUSG00000036198 | Arhgap36 | 0.991973244 | 6.99E-07 |
| mNP | ENSMUSG00000074785 | Plxnc1   | 0.990635452 | 1.07E-06 |
| mNP | ENSMUSG00000054457 | NA       | 0.990412486 | 6.03E-07 |
| mNP | ENSMUSG00000001420 | Tmem79   | 0.989966555 | 1.15E-06 |
| mNP | ENSMUSG00000027654 | Fam83d   | 0.989520624 | 7.97E-07 |
| mNP | ENSMUSG00000007655 | Cav1     | 0.988851728 | 7.24E-07 |
| mNP | ENSMUSG00000031517 | Gpm6a    | 0.988628763 | 1.11E-06 |
| mNP | ENSMUSG00000086915 | NA       | 0.988405797 | 1.20E-06 |
| mNP | ENSMUSG00000061859 | Inadl    | 0.987736901 | 1.32E-06 |
| mNP | ENSMUSG00000005148 | Klf5     | 0.987513935 | 1.20E-06 |
| mNP | ENSMUSG00000024172 | St6gal2  | 0.987513935 | 7.50E-07 |
| mNP | ENSMUSG00000061126 | Cyp4f39  | 0.98729097  | 8.75E-07 |
| mNP | ENSMUSG00000024697 | Gna14    | 0.987068004 | 1.27E-06 |
| mNP | ENSMUSG00000029088 | Kcnip4   | 0.986845039 | 1.50E-06 |
| mNP | ENSMUSG00000032420 | Nt5e     | 0.986622074 | 1.42E-06 |
| mNP | ENSMUSG00000036062 | Phf24    | 0.986399108 | 1.56E-06 |
| mNP | ENSMUSG00000021852 | Slc35f4  | 0.986399108 | 1.49E-06 |
| mNP | ENSMUSG00000035954 | Dock4    | 0.985061315 | 1.53E-06 |
| mNP | ENSMUSG00000053141 | Ptprt    | 0.98483835  | 1.52E-06 |
| mNP | ENSMUSG00000029185 | Fam114a1 | 0.984615385 | 1.63E-06 |
| mNP | ENSMUSG00000026519 | Tmem63a  | 0.983054627 | 1.68E-06 |
| mNP | ENSMUSG00000022490 | Ppp1r1a  | 0.981939799 | 1.73E-06 |
| mNP | ENSMUSG00000079278 | Tmem233  | 0.981047938 | 2.08E-06 |
| mNP | ENSMUSG00000032812 | Arap1    | 0.980824972 | 2.45E-06 |
| mNP | ENSMUSG00000039197 | Adk      | 0.980379041 | 2.58E-06 |
| mNP | ENSMUSG00000027016 | Zfp385b  | 0.980156076 | 2.44E-06 |
| mNP | ENSMUSG00000024511 | Rab27b   | 0.97993311  | 2.63E-06 |
| mNP | ENSMUSG00000021423 | Ly86     | 0.979710145 | 2.72E-06 |
| mNP | ENSMUSG00000026399 | Cd55     | 0.979487179 | 2.78E-06 |
| mNP | ENSMUSG00000032380 | Dapk2    | 0.979041249 | 2.48E-06 |
| mNP | ENSMUSG00000091722 | Siah3    | 0.978818283 | 1.97E-06 |
| mNP | ENSMUSG00000062151 | Unc13c   | 0.978818283 | 2.13E-06 |
| mNP | ENSMUSG00000071489 | Ptgdr    | 0.978149387 | 2.71E-06 |
| mNP | ENSMUSG00000070551 | Mrgprb5  | 0.976923077 | 2.22E-06 |
| mNP | ENSMUSG00000027071 | P2rx3    | 0.975919732 | 3.72E-06 |
| mNP | ENSMUSG00000017588 | Krt27    | 0.975250836 | 2.53E-06 |
| mNP | ENSMUSG00000067786 | Nnat     | 0.974804905 | 3.78E-06 |
| mNP | ENSMUSG00000074968 | Ano3     | 0.974136009 | 4.32E-06 |
| mNP | ENSMUSG00000038872 | Zfx3     | 0.973467113 | 4.33E-06 |



|     |                    |               |             |          |
|-----|--------------------|---------------|-------------|----------|
| mNP | ENSMUSG00000097768 | NA            | 0.972575251 | 3.16E-06 |
| mNP | ENSMUSG00000024620 | Pdgfrb        | 0.972575251 | 3.80E-06 |
| mNP | ENSMUSG00000020000 | Moxd1         | 0.972352285 | 3.13E-06 |
| mNP | ENSMUSG00000024558 | Mapk4         | 0.972352285 | 4.67E-06 |
| mNP | ENSMUSG00000027347 | Rasgrp1       | 0.971014493 | 5.52E-06 |
| mNP | ENSMUSG00000043110 | Lrrn4         | 0.970122631 | 3.61E-06 |
| mNP | ENSMUSG00000027215 | Cd82          | 0.969899666 | 6.08E-06 |
| mNP | ENSMUSG00000051920 | Rspo2         | 0.969899666 | 5.58E-06 |
| mNP | ENSMUSG00000034115 | Scn11a        | 0.969453735 | 6.33E-06 |
| mNP | ENSMUSG00000058740 | Kcnt1         | 0.967001115 | 7.73E-06 |
| mNP | ENSMUSG00000037735 | NA            | 0.967001115 | 6.18E-06 |
| mNP | ENSMUSG00000045404 | Kcnk13        | 0.967001115 | 6.56E-06 |
| mNP | ENSMUSG00000081225 | Cyp2j12       | 0.966778149 | 5.15E-06 |
| mNP | ENSMUSG00000002504 | Slc9a3r2      | 0.965663322 | 8.61E-06 |
| mNP | ENSMUSG00000049409 | Prokr1        | 0.964994426 | 6.16E-06 |
| mNP | ENSMUSG00000026778 | Prkcq         | 0.964102564 | 6.53E-06 |
| mNP | ENSMUSG00000034533 | Scn10a        | 0.963433668 | 1.03E-05 |
| mNP | ENSMUSG00000048442 | Smim5         | 0.962987737 | 9.04E-06 |
| mNP | ENSMUSG00000037824 | Tspan14       | 0.962541806 | 1.11E-05 |
| mNP | ENSMUSG00000055805 | Fmn1          | 0.960089186 | 1.34E-05 |
| mNP | ENSMUSG00000054469 | Lclat1        | 0.959197324 | 1.45E-05 |
| mNP | ENSMUSG00000097789 | Gm2115        | 0.958751394 | 1.37E-05 |
| mNP | ENSMUSG00000020592 | Sdc1          | 0.958751394 | 1.39E-05 |
| mNP | ENSMUSG00000026023 | Cdk15         | 0.958528428 | 1.23E-05 |
| mNP | ENSMUSG00000061184 | Tmprss11c     | 0.958305463 | 9.75E-06 |
| mNP | ENSMUSG00000036306 | Lzts1         | 0.958305463 | 1.49E-05 |
| mNP | ENSMUSG00000106554 | NA            | 0.957859532 | 1.28E-05 |
| mNP | ENSMUSG00000023232 | Serinc2       | 0.957413601 | 1.61E-05 |
| mNP | ENSMUSG00000001288 | Rarg          | 0.957190635 | 1.59E-05 |
| mNP | ENSMUSG00000034898 | Filip1        | 0.956075808 | 1.84E-05 |
| mNP | ENSMUSG00000020262 | Adarb1        | 0.955629877 | 1.80E-05 |
| mNP | ENSMUSG00000030768 | Disp1         | 0.955406912 | 1.89E-05 |
| mNP | ENSMUSG00000049420 | Tmem200a      | 0.955183946 | 1.75E-05 |
| mNP | ENSMUSG00000022103 | Gfra2         | 0.952731327 | 2.09E-05 |
| mNP | ENSMUSG00000056313 | 1810011O10Rik | 0.951839465 | 1.91E-05 |
| mNP | ENSMUSG00000028977 | Casz1         | 0.951616499 | 2.56E-05 |
| mNP | ENSMUSG00000056492 | Adgrf5        | 0.951170569 | 1.93E-05 |
| mNP | ENSMUSG00000052544 | St6galnac3    | 0.950724638 | 2.71E-05 |
| mNP | ENSMUSG00000101860 | NA            | 0.950724638 | 2.58E-05 |
| mNP | ENSMUSG00000054728 | Phactr1       | 0.950278707 | 2.92E-05 |
| mNP | ENSMUSG00000008393 | Carhsp1       | 0.950055741 | 2.97E-05 |
| mNP | ENSMUSG00000028487 | Bnc2          | 0.948272018 | 3.13E-05 |
| mNP | ENSMUSG00000028367 | Txn1          | 0.948049052 | 3.48E-05 |

|     |                    |            |             |             |
|-----|--------------------|------------|-------------|-------------|
| mNP | ENSMUSG00000034990 | Otoa       | 0.948049052 | 2.79E-05    |
| mNP | ENSMUSG00000026527 | Rgs7       | 0.947826087 | 3.53E-05    |
| mNP | ENSMUSG00000025429 | Pstpip2    | 0.947826087 | 3.31E-05    |
| mNP | ENSMUSG00000026765 | Lypd6b     | 0.947268673 | 2.94E-05    |
| mNP | ENSMUSG00000002908 | Kcnn1      | 0.947157191 | 3.68E-05    |
| mNP | ENSMUSG00000034485 | Uaca       | 0.947157191 | 3.70E-05    |
| mNP | ENSMUSG00000000154 | Slc22a18   | 0.946934225 | 3.34E-05    |
| mNP | ENSMUSG00000030905 | Crym       | 0.94671126  | 3.52E-05    |
| mNP | ENSMUSG00000030917 | Tmem159    | 0.945150502 | 3.82E-05    |
| mNP | ENSMUSG00000036304 | Zdhhc23    | 0.944481605 | 3.64E-05    |
| mNP | ENSMUSG00000000303 | Cdh1       | 0.94425864  | 4.26E-05    |
| mNP | ENSMUSG00000062309 | Rpp25      | 0.944035674 | 3.94E-05    |
| mNP | ENSMUSG00000039621 | Prex1      | 0.942920847 | 4.97E-05    |
| mNP | ENSMUSG00000023224 | Serping1   | 0.941471572 | 5.68E-05    |
| mNP | ENSMUSG00000031668 | Eif2ak3    | 0.941360089 | 5.75E-05    |
| mNP | ENSMUSG00000025572 | Tmc6       | 0.941137124 | 5.28E-05    |
| mNP | ENSMUSG00000040907 | Atp1a3     | 0.940245262 | 6.34E-05    |
| mNP | ENSMUSG00000033453 | Adamts15   | 0.939576366 | 5.46E-05    |
| mNP | ENSMUSG00000042671 | Rgs8       | 0.939130435 | 6.78E-05    |
| mNP | ENSMUSG00000058881 | Zfp516     | 0.939130435 | 6.35E-05    |
| mNP | ENSMUSG00000046546 | Fam43a     | 0.938907469 | 4.74E-05    |
| mNP | ENSMUSG00000024743 | Syt7       | 0.938684504 | 7.14E-05    |
| mNP | ENSMUSG00000055653 | Gpc3       | 0.938461538 | 4.50E-05    |
| mNP | ENSMUSG00000021559 | Dapk1      | 0.938461538 | 7.26E-05    |
| mNP | ENSMUSG00000036832 | Lpar3      | 0.938350056 | 5.36E-05    |
| mNP | ENSMUSG00000025813 | Homer2     | 0.93690078  | 7.62E-05    |
| mNP | ENSMUSG00000039682 | Lap3       | 0.936454849 | 8.46E-05    |
| mNP | ENSMUSG00000058656 | Samd12     | 0.935785953 | 8.87E-05    |
| mNP | ENSMUSG00000021118 | Plek2      | 0.934671126 | 8.40E-05    |
| mNP | ENSMUSG00000059810 | Rgs3       | 0.934448161 | 9.84E-05    |
| mNP | ENSMUSG00000030844 | Rgs10      | 0.93400223  | 0.000101758 |
| mNP | ENSMUSG00000050138 | Kcnk12     | 0.93400223  | 0.000100808 |
| mNP | ENSMUSG00000027669 | Gnb4       | 0.933333333 | 0.000107031 |
| mNP | ENSMUSG00000039037 | St6galnac5 | 0.933221851 | 9.20E-05    |
| mNP | ENSMUSG00000050965 | Prkca      | 0.932887402 | 0.000110691 |
| mNP | ENSMUSG00000055865 | Fam19a3    | 0.932664437 | 7.71E-05    |
| mNP | ENSMUSG00000002997 | Prkar2b    | 0.932664437 | 0.000112544 |
| mNP | ENSMUSG00000035095 | Fam167a    | 0.932329989 | 7.64E-05    |
| mNP | ENSMUSG00000031994 | Adamts8    | 0.928316611 | 0.000120918 |
| mNP | ENSMUSG00000035934 | Pknnox2    | 0.928205128 | 0.000154656 |
| mNP | ENSMUSG00000030350 | Prmt8      | 0.926867336 | 0.000149204 |
| mNP | ENSMUSG00000046500 | Fam19a4    | 0.92664437  | 0.000130838 |
| mNP | ENSMUSG00000021998 | Lcp1       | 0.92664437  | 0.000175926 |

|     |                    |               |             |             |
|-----|--------------------|---------------|-------------|-------------|
| mNP | ENSMUSG00000038530 | Rgs4          | 0.926198439 | 0.000182093 |
| mNP | ENSMUSG00000045932 | Ifit2         | 0.925529543 | 0.000190872 |
| mNP | ENSMUSG00000047409 | Ctdspl        | 0.925529543 | 0.000185746 |
| mNP | ENSMUSG00000042082 | Arsb          | 0.925529543 | 0.000191077 |
| mNP | ENSMUSG00000029174 | Tbc1d1        | 0.924860647 | 0.000190302 |
| mNP | ENSMUSG00000090667 | Gm765         | 0.924860647 | 0.000129822 |
| mNP | ENSMUSG00000047557 | Lxn           | 0.923522854 | 0.000221815 |
| mNP | ENSMUSG00000038665 | Dgki          | 0.923522854 | 0.000221815 |
| mNP | ENSMUSG00000050447 | Lypd6         | 0.923299889 | 0.00014996  |
| mNP | ENSMUSG00000051159 | Cited1        | 0.923076923 | 0.000186703 |
| mNP | ENSMUSG00000055737 | Ghr           | 0.923076923 | 0.000228411 |
| mNP | ENSMUSG00000022747 | St3gal6       | 0.923076923 | 0.000228925 |
| mNP | ENSMUSG00000040901 | Kcnk18        | 0.922630992 | 0.000184413 |
| mNP | ENSMUSG00000035184 | Fam124a       | 0.920847269 | 0.000261672 |
| mNP | ENSMUSG00000056158 | Car10         | 0.920624303 | 0.00026684  |
| mNP | ENSMUSG00000042215 | Bag2          | 0.919509476 | 0.000297522 |
| mNP | ENSMUSG00000024063 | Lbh           | 0.916833891 | 0.000360954 |
| mNP | ENSMUSG00000044667 | Plppr4        | 0.91638796  | 0.000354741 |
| mNP | ENSMUSG00000030769 | Slc5a11       | 0.915942029 | 0.000302078 |
| mNP | ENSMUSG00000024960 | Plcb3         | 0.915719064 | 0.000392148 |
| mNP | ENSMUSG00000036242 | 3632451O06Rik | 0.915496098 | 0.000398468 |
| mNP | ENSMUSG00000026655 | Fam107b       | 0.915273133 | 0.000404693 |
| mNP | ENSMUSG00000045095 | Magi1         | 0.915273133 | 0.000404693 |
| mNP | ENSMUSG00000020868 | Xylt2         | 0.915050167 | 0.000403331 |
| mNP | ENSMUSG00000021981 | Cab39l        | 0.914381271 | 0.000431738 |
| mNP | ENSMUSG00000037071 | Scd1          | 0.914381271 | 0.000431738 |
| mNP | ENSMUSG00000021822 | Plau          | 0.913712375 | 0.000313311 |
| mNP | ENSMUSG00000032220 | Myo1e         | 0.913266444 | 0.000467117 |
| mNP | ENSMUSG00000038332 | Sesn1         | 0.913043478 | 0.000473393 |
| mNP | ENSMUSG00000056947 | Mab211l       | 0.912931996 | 0.000316767 |
| mNP | ENSMUSG00000062184 | Hs6st2        | 0.912374582 | 0.000487847 |
| mNP | ENSMUSG00000020961 | Ston2         | 0.912151616 | 0.000496067 |
| mNP | ENSMUSG00000024544 | Ldlrad4       | 0.911705686 | 0.000434365 |
| mNP | ENSMUSG00000032012 | Pvrl1         | 0.911705686 | 0.000488169 |
| mNP | ENSMUSG00000009731 | Kcnd1         | 0.911259755 | 0.000538399 |
| mNP | ENSMUSG00000046223 | Plaur         | 0.911036789 | 0.000536143 |
| mNP | ENSMUSG00000033767 | D930015E06Rik | 0.910813824 | 0.000553433 |
| mNP | ENSMUSG00000048756 | Foxo3         | 0.910144928 | 0.000582902 |
| mNP | ENSMUSG00000032593 | Amigo3        | 0.910144928 | 0.000582272 |
| mNP | ENSMUSG00000029669 | Tspan12       | 0.909921962 | 0.000550501 |
| mNP | ENSMUSG00000024479 | Mal2          | 0.909921962 | 0.000585562 |
| mNP | ENSMUSG00000063142 | Kcnma1        | 0.908807135 | 0.000637527 |
| mNP | ENSMUSG00000052539 | Magi3         | 0.908361204 | 0.000661933 |

|     |                    |          |             |             |
|-----|--------------------|----------|-------------|-------------|
| mNP | ENSMUSG00000027375 | Mal      | 0.907692308 | 0.000668491 |
| mNP | ENSMUSG00000022377 | Asap1    | 0.907023411 | 0.000727567 |
| mNP | ENSMUSG00000047139 | Cd24a    | 0.905685619 | 0.000799446 |
| mNP | ENSMUSG00000069833 | Ahnak    | 0.905685619 | 0.000796966 |
| mNP | ENSMUSG00000021948 | Prkcd    | 0.905462653 | 0.000812198 |
| mNP | ENSMUSG00000031093 | Dock11   | 0.904347826 | 0.000878129 |
| mNP | ENSMUSG00000071604 | Fam189a2 | 0.904347826 | 0.000844051 |
| mNP | ENSMUSG00000035778 | Ggta1    | 0.904347826 | 0.000866299 |
| mNP | ENSMUSG00000041120 | Nbl1     | 0.904124861 | 0.000890927 |
| mNP | ENSMUSG00000038417 | Fig4     | 0.904124861 | 0.000891829 |
| mNP | ENSMUSG00000086040 | Wipf3    | 0.903901895 | 0.000884764 |
| mNP | ENSMUSG00000040430 | Pitpnc1  | 0.903455964 | 0.00093437  |
| mNP | ENSMUSG00000040234 | Tm7sf3   | 0.902787068 | 0.000977177 |
| mNP | ENSMUSG00000060924 | Csmc1    | 0.902787068 | 0.000977291 |
| mNP | ENSMUSG00000045312 | Lhfpl2   | 0.901895206 | 0.000946437 |
| mNP | ENSMUSG00000035268 | Pkig     | 0.901449275 | 0.001074948 |
| mNP | ENSMUSG00000020642 | Rnf144a  | 0.90122631  | 0.001090232 |
| mNP | ENSMUSG00000074111 | Mrgpra9  | 0.901003344 | 0.000946449 |
| mNP | ENSMUSG00000050335 | Lgals3   | 0.900334448 | 0.001075072 |
| mNP | ENSMUSG00000022952 | Runx1    | 0.900111483 | 0.001178875 |
| mNP | ENSMUSG00000086122 | NA       | 0.899442586 | 0.001110806 |
| mNP | ENSMUSG00000030123 | Plxnd1   | 0.899442586 | 0.00123105  |
| mNP | ENSMUSG00000104330 | NA       | 0.899442586 | 0.001105524 |
| mNP | ENSMUSG00000040549 | Ckap5    | 0.898996656 | 0.00127421  |
| mNP | ENSMUSG00000057531 | Dtnbp1   | 0.898550725 | 0.001314161 |
| mNP | ENSMUSG00000026828 | Galnt5   | 0.898327759 | 0.001322679 |
| mNP | ENSMUSG00000004270 | Lpcat3   | 0.898104794 | 0.001354278 |
| mNP | ENSMUSG00000024589 | Nedd4l   | 0.897435897 | 0.001419505 |
| mNP | ENSMUSG00000033578 | Tmem35   | 0.897324415 | 0.001359662 |
| mNP | ENSMUSG00000074238 | Ap1ar    | 0.895429208 | 0.001630284 |
| mNP | ENSMUSG00000004952 | Rasa4    | 0.895429208 | 0.001561929 |
| mNP | ENSMUSG00000010505 | Myt1     | 0.895206243 | 0.001648941 |
| mNP | ENSMUSG00000025432 | Avil     | 0.894760312 | 0.001705895 |
| mNP | ENSMUSG00000033470 | Cysltr2  | 0.89386845  | 0.001536239 |
| mNP | ENSMUSG00000020696 | Rffl     | 0.89386845  | 0.001804305 |
| mNP | ENSMUSG00000026880 | Stom     | 0.893199554 | 0.001894842 |
| mNP | ENSMUSG00000028952 | Zbtb48   | 0.892976589 | 0.001897416 |
| mNP | ENSMUSG00000096982 | NA       | 0.892865106 | 0.001645656 |
| mNP | ENSMUSG00000021217 | Tshz3    | 0.892084727 | 0.002038193 |
| mNP | ENSMUSG00000030930 | Chst15   | 0.891861761 | 0.002024189 |
| mNP | ENSMUSG00000020155 | Kcnmb1   | 0.891861761 | 0.002067803 |
| mNP | ENSMUSG00000104610 | NA       | 0.8909699   | 0.001855459 |
| mNP | ENSMUSG00000040136 | Abcc8    | 0.8909699   | 0.001720801 |

|     |                    |          |             |             |
|-----|--------------------|----------|-------------|-------------|
| mNP | ENSMUSG00000037188 | Grhl3    | 0.890412486 | 0.001902015 |
| mNP | ENSMUSG00000061887 | Ssbp3    | 0.890301003 | 0.002312599 |
| mNP | ENSMUSG00000041608 | Entpd3   | 0.890301003 | 0.002312027 |
| mNP | ENSMUSG00000034226 | Rhov     | 0.890078038 | 0.002347303 |
| mNP | ENSMUSG00000058589 | Anks1b   | 0.890078038 | 0.002347303 |
| mNP | ENSMUSG00000021745 | Ptprg    | 0.888740245 | 0.002552691 |
| mNP | ENSMUSG00000031673 | Cdh11    | 0.887959866 | 0.002663361 |
| mNP | ENSMUSG00000036452 | Arhgap26 | 0.887848384 | 0.002727635 |
| mNP | ENSMUSG00000020227 | Irak3    | 0.887736901 | 0.00246471  |
| mNP | ENSMUSG00000051379 | Flrt3    | 0.887625418 | 0.002761044 |
| mNP | ENSMUSG00000037661 | Gpr160   | 0.887625418 | 0.002716324 |
| mNP | ENSMUSG00000032318 | Isl2     | 0.886956522 | 0.002896702 |
| mNP | ENSMUSG00000028381 | Ugcg     | 0.886733556 | 0.002938763 |
| mNP | ENSMUSG00000030499 | Kctd15   | 0.886510591 | 0.002418451 |
| mNP | ENSMUSG00000026435 | Slc45a3  | 0.886510591 | 0.002975299 |
| mNP | ENSMUSG00000021866 | Anxa11   | 0.886510591 | 0.002958473 |
| mNP | ENSMUSG00000021306 | Gpr137b  | 0.88606466  | 0.003071328 |
| mNP | ENSMUSG00000069670 | Nkain2   | 0.885618729 | 0.002918846 |
| mNP | ENSMUSG00000020422 | Tns3     | 0.885618729 | 0.003060636 |
| mNP | ENSMUSG00000056938 | Acbd4    | 0.885618729 | 0.00316427  |
| mNP | ENSMUSG00000000958 | Slc7a7   | 0.884503902 | 0.003408215 |
| mNP | ENSMUSG00000026991 | Pkp4     | 0.883166109 | 0.003645976 |
| mNP | ENSMUSG00000032035 | Ets1     | 0.883166109 | 0.003578438 |
| mNP | ENSMUSG00000059288 | Cdyl     | 0.882497213 | 0.003818999 |
| mNP | ENSMUSG00000040016 | Ptger3   | 0.88238573  | 0.003799829 |
| mNP | ENSMUSG00000045440 | Insm2    | 0.882051282 | 0.00398558  |
| mNP | ENSMUSG00000081951 | NA       | 0.881939799 | 0.003544556 |
| mNP | ENSMUSG00000054871 | Tmem158  | 0.88115942  | 0.004246836 |
| mNP | ENSMUSG00000059852 | Kcng2    | 0.88115942  | 0.003966717 |
| mNP | ENSMUSG00000074916 | Chst14   | 0.880490524 | 0.004379114 |
| mNP | ENSMUSG00000070639 | Lrrc8b   | 0.880267559 | 0.004510332 |
| mNP | ENSMUSG00000023000 | Dhh      | 0.879821628 | 0.00416997  |
| mNP | ENSMUSG00000027849 | Syt6     | 0.8787068   | 0.004817071 |
| mNP | ENSMUSG00000099686 | NA       | 0.877591973 | 0.003713071 |
| mNP | ENSMUSG00000041362 | Shtn1    | 0.876700111 | 0.005677303 |
| mNP | ENSMUSG00000025196 | Cpn1     | 0.873801561 | 0.006439377 |
| mNP | ENSMUSG00000104233 | NA       | 0.873690078 | 0.006440682 |
| mNP | ENSMUSG00000083892 | NA       | 0.87335563  | 0.007069536 |
| mNP | ENSMUSG00000094843 | NA       | 0.872463768 | 0.007334693 |
| mNP | ENSMUSG00000020698 | Cct6b    | 0.872017837 | 0.006738514 |
| mNP | ENSMUSG00000044164 | Rnf182   | 0.871794872 | 0.007444208 |
| mNP | ENSMUSG00000029217 | Tec      | 0.871683389 | 0.007321723 |
| mNP | ENSMUSG00000027646 | Src      | 0.871571906 | 0.007944279 |

|     |                    |           |             |             |             |
|-----|--------------------|-----------|-------------|-------------|-------------|
| mNP | ENSMUSG00000037833 | Sh2d4b    | 0.871125975 | 0.00768241  |             |
| mNP | ENSMUSG00000027954 | Efna1     | 0.870680045 | 0.008436263 |             |
| mNP | ENSMUSG00000086825 | NA        | 0.870345596 | 0.007997458 |             |
| mNP | ENSMUSG00000018906 | P4ha2     | 0.870011148 | 0.007679251 |             |
| mNP | ENSMUSG00000040896 | Kcnd3     | 0.869119287 | 0.009237491 |             |
| mNP | ENSMUSG00000000058 | Cav2      | 0.868673356 | 0.009581963 |             |
| mNP | ENSMUSG00000023055 | Calcoco1  | 0.868004459 | 0.010010279 |             |
| mNP | ENSMUSG00000029007 | Agtrap    | 0.867558528 | 0.010273871 |             |
| mNP | ENSMUSG00000025558 | Dock9     | 0.867112598 | 0.010588573 |             |
| mNP | ENSMUSG00000032366 | Tpm1      | 0.867112598 | 0.010594237 |             |
| mNP | ENSMUSG00000030134 | Rasgef1a  | 0.866666667 | 0.010895199 |             |
| mNP | ENSMUSG00000044528 | Tram111   | 0.866666667 | 0.010659575 |             |
| mNP | ENSMUSG00000052698 | Tln2      | 0.865774805 | 0.011528541 |             |
| mNP | ENSMUSG00000101780 | NA        | 0.865551839 | 0.011479529 |             |
| mNP | ENSMUSG00000030098 | Grip2     | 0.864882943 | 0.011460687 |             |
| mNP | ENSMUSG00000025795 | Rassf3    | 0.864882943 | 0.012094266 |             |
| mNP | ENSMUSG00000023143 | Nagpa     | 0.864659978 | 0.012324336 |             |
| mNP | ENSMUSG00000045349 | Sh2d5     | 0.863991081 | 0.012848376 |             |
| mNP | ENSMUSG00000015335 | Zdhhc12   | 0.863768116 | 0.013068871 |             |
| mNP | ENSMUSG00000015652 | Steap1    | 0.863768116 | 0.01150182  |             |
| mNP | ENSMUSG00000016179 | Camk1g    | 0.86309922  | 0.013608806 |             |
| mNP | ENSMUSG00000034275 | Igsf9b    | 0.862430323 | 0.014018871 |             |
| mNP | ENSMUSG00000002365 | Snx9      | 0.862430323 | 0.014215775 |             |
| mNP | ENSMUSG00000022269 |           | Mar-11      | 0.861984392 | 0.014543416 |
| mNP | ENSMUSG00000102330 | NA        | 0.861204013 | 0.012685355 |             |
| mNP | ENSMUSG00000042712 | Wbp5      | 0.861092531 | 0.015480413 |             |
| mNP | ENSMUSG00000085795 | Zfp703    | 0.861092531 | 0.014944992 |             |
| mNP | ENSMUSG00000020605 | Hs1bp3    | 0.861092531 | 0.015460788 |             |
| mNP | ENSMUSG00000019951 | Uhrf1bp1l | 0.860869565 | 0.015695057 |             |
| mNP | ENSMUSG00000003541 | Ier3      | 0.8606466   | 0.015863196 |             |
| mNP | ENSMUSG00000021301 | Hecw1     | 0.8606466   | 0.015912522 |             |
| mNP | ENSMUSG00000047045 | Tmem164   | 0.860200669 | 0.016354476 |             |
| mNP | ENSMUSG00000040479 | Dgkz      | 0.859754738 | 0.01682165  |             |
| mNP | ENSMUSG00000074796 | Slc4a11   | 0.859754738 | 0.016793257 |             |
| mNP | ENSMUSG00000040447 | Spns2     | 0.859531773 | 0.015972121 |             |
| mNP | ENSMUSG00000023909 | Paqr4     | 0.859531773 | 0.017060754 |             |
| mNP | ENSMUSG00000003279 | Dlgap1    | 0.859085842 | 0.017503191 |             |
| mNP | ENSMUSG00000005413 | Hmox1     | 0.858862876 | 0.017768584 |             |
| mNP | ENSMUSG00000042272 | Sestd1    | 0.858416945 | 0.018275155 |             |
| mNP | ENSMUSG00000056880 | Gad1l     | 0.858416945 | 0.014737223 |             |
| mNP | ENSMUSG00000025089 | Gfra1     | 0.85819398  | 0.018206041 |             |
| mNP | ENSMUSG00000019823 | Mical1    | 0.857748049 | 0.019032221 |             |
| mNP | ENSMUSG00000021432 | Slc35b3   | 0.857525084 | 0.019262035 |             |

|      |                     |          |             |             |
|------|---------------------|----------|-------------|-------------|
| mNP  | ENSMUSG00000032261  | Sh3bgrl2 | 0.856856187 | 0.020125272 |
| mNP  | ENSMUSG00000021665  | Hexb     | 0.856856187 | 0.020125272 |
| mNP  | ENSMUSG00000041930  | Fam222a  | 0.85574136  | 0.021279315 |
| mNP  | ENSMUSG00000038280  | Ostm1    | 0.855295429 | 0.022158698 |
| mNP  | ENSMUSG00000015243  | Abca1    | 0.854849498 | 0.02277616  |
| mNP  | ENSMUSG00000010476  | Ebf3     | 0.854403567 | 0.022944652 |
| mNP  | ENSMUSG00000030539  | Sema4b   | 0.85328874  | 0.025088597 |
| mNP  | ENSMUSG00000008305  | Tle1     | 0.852619844 | 0.026143719 |
| mNP  | ENSMUSG00000005087  | Cd44     | 0.851059086 | 0.02874358  |
| mNP  | ENSMUSG000000051065 | Mb21d2   | 0.851059086 | 0.02627932  |
| mNP  | ENSMUSG000000097240 | NA       | 0.851059086 | 0.028708803 |
| mNP  | ENSMUSG00000023009  | Nckap5l  | 0.85083612  | 0.029112012 |
| mNP  | ENSMUSG00000039662  | Icmt     | 0.850613155 | 0.029550534 |
| mNP  | ENSMUSG00000074802  | Gas2l3   | 0.850167224 | 0.029550534 |
| mNP  | ENSMUSG00000037759  | Ptger2   | 0.850055741 | 0.028053996 |
| mNP  | ENSMUSG00000015839  | Nfe2l2   | 0.849721293 | 0.031166585 |
| mNP  | ENSMUSG00000035245  | Eogt     | 0.849498328 | 0.031282415 |
| mNP  | ENSMUSG00000056612  | Ppp1r14b | 0.849498328 | 0.031567158 |
| mNP  | ENSMUSG00000068523  | Gng5     | 0.849052397 | 0.03240774  |
| mNP  | ENSMUSG00000035805  | Mlc1     | 0.848940914 | 0.030383507 |
| mNP  | ENSMUSG00000054720  | Lrrc8c   | 0.84793757  | 0.034679578 |
| mNP  | ENSMUSG00000007908  | Hmgcll1  | 0.847714604 | 0.035071217 |
| mNP  | ENSMUSG00000047414  | Flrt2    | 0.847603122 | 0.029741144 |
| mNP  | ENSMUSG00000020990  | Cdkl1    | 0.847380156 | 0.033983848 |
| mNP  | ENSMUSG00000029735  | Tpk1     | 0.847045708 | 0.036368677 |
| mNP  | ENSMUSG00000033983  | Coil     | 0.846822742 | 0.036999289 |
| mNP  | ENSMUSG00000040631  | Dok4     | 0.846822742 | 0.037076416 |
| mNP  | ENSMUSG00000101567  | NA       | 0.846265329 | 0.032896585 |
| mNP  | ENSMUSG00000096719  | Mrgpra2b | 0.845930881 | 0.038636003 |
| mNP  | ENSMUSG00000024858  | Adrbk1   | 0.845707915 | 0.039683297 |
| mNP  | ENSMUSG00000051236  | Msr3     | 0.845596433 | 0.035565066 |
| mNP  | ENSMUSG00000071567  | NA       | 0.844593088 | 0.041552315 |
| mNP  | ENSMUSG00000030471  | Zdhhc13  | 0.844370123 | 0.043007536 |
| mNP  | ENSMUSG00000047714  | Ppp1r2   | 0.844370123 | 0.043017414 |
| mNP  | ENSMUSG00000033107  | Rnf125   | 0.844147157 | 0.043589231 |
| mNP  | ENSMUSG00000041762  | Gpr155   | 0.843924192 | 0.044134491 |
| mNP  | ENSMUSG00000023908  | Pkmyt1   | 0.843924192 | 0.043925732 |
| mNP  | ENSMUSG00000032238  | Rora     | 0.842363434 | 0.048103516 |
| mNP  | ENSMUSG00000050732  | Vamp8    | 0.842028986 | 0.046386567 |
| mNP  | ENSMUSG00000024781  | Lipa     | 0.841917503 | 0.049808688 |
| mNP  | ENSMUSG00000044243  | Bhlha9   | 0.841360089 | 0.043537908 |
| mNP  | ENSMUSG00000044921  | Rassf9   | 0.83690078  | 0.047936706 |
| mNFa | ENSMUSG00000010803  | Gabra1   | 0.996644295 | 9.75E-08    |

|      |                    |          |             |          |
|------|--------------------|----------|-------------|----------|
| mNFa | ENSMUSG00000027765 | P2ry1    | 0.996015101 | 1.29E-07 |
| mNFa | ENSMUSG00000033998 | Kcnk1    | 0.994127517 | 2.08E-07 |
| mNFa | ENSMUSG00000038859 | Baiap2l1 | 0.992869128 | 2.16E-07 |
| mNFa | ENSMUSG00000002228 | Ppm1j    | 0.986996644 | 3.20E-07 |
| mNFa | ENSMUSG00000046480 | Scn4b    | 0.984689597 | 4.46E-07 |
| mNFa | ENSMUSG00000070687 | Htr1d    | 0.983850671 | 3.94E-07 |
| mNFa | ENSMUSG00000049404 | Rarres1  | 0.98238255  | 5.76E-07 |
| mNFa | ENSMUSG00000034891 | Sncb     | 0.981963087 | 5.91E-07 |
| mNFa | ENSMUSG00000059742 | Kcnh7    | 0.981543624 | 6.51E-07 |
| mNFa | ENSMUSG00000022176 | Rem2     | 0.975671141 | 7.67E-07 |
| mNFa | ENSMUSG00000096606 | Tpbgl    | 0.974098154 | 9.89E-07 |
| mNFa | ENSMUSG00000027833 | Shox2    | 0.973888423 | 7.01E-07 |
| mNFa | ENSMUSG00000048108 | Tmem72   | 0.972734899 | 1.16E-06 |
| mNFa | ENSMUSG00000039601 | Rcan2    | 0.970427852 | 1.72E-06 |
| mNFa | ENSMUSG00000030302 | Atp2b2   | 0.967701342 | 2.18E-06 |
| mNFa | ENSMUSG00000085007 | Gm11549  | 0.966547819 | 1.41E-06 |
| mNFa | ENSMUSG00000044252 | Osbpl1a  | 0.962877517 | 3.34E-06 |
| mNFa | ENSMUSG00000030088 | Aldh1l1  | 0.959312081 | 3.63E-06 |
| mNFa | ENSMUSG00000031837 | Necab2   | 0.958263423 | 3.93E-06 |
| mNFa | ENSMUSG00000054459 | Vsnl1    | 0.958053691 | 4.14E-06 |
| mNFa | ENSMUSG00000086847 | Tbx3os2  | 0.957005034 | 3.68E-06 |
| mNFa | ENSMUSG00000039252 | Lgi2     | 0.956690436 | 3.76E-06 |
| mNFa | ENSMUSG00000024065 | Ehd3     | 0.955746644 | 6.10E-06 |
| mNFa | ENSMUSG00000039911 | Spsb1    | 0.953229866 | 7.53E-06 |
| mNFa | ENSMUSG00000070570 | Slc17a7  | 0.953125    | 5.48E-06 |
| mNFa | ENSMUSG00000047842 | Diras2   | 0.94966443  | 1.00E-05 |
| mNFa | ENSMUSG00000019528 | Gyg      | 0.949244966 | 1.05E-05 |
| mNFa | ENSMUSG00000046699 | Slitrk4  | 0.947567114 | 7.69E-06 |
| mNFa | ENSMUSG00000041112 | Elmo1    | 0.945260067 | 1.36E-05 |
| mNFa | ENSMUSG00000034648 | Lrrn1    | 0.944001678 | 1.62E-05 |
| mNFa | ENSMUSG00000034127 | Tspan8   | 0.943896812 | 1.49E-05 |
| mNFa | ENSMUSG00000063239 | Grm4     | 0.942533557 | 1.33E-05 |
| mNFa | ENSMUSG00000030246 | Ldhb     | 0.942323826 | 1.85E-05 |
| mNFa | ENSMUSG00000041115 | Iqsec2   | 0.941484899 | 1.98E-05 |
| mNFa | ENSMUSG00000017400 | Stac2    | 0.941065436 | 1.91E-05 |
| mNFa | ENSMUSG00000046442 | Ppm1e    | 0.940645973 | 1.97E-05 |
| mNFa | ENSMUSG00000056258 | Kcnq3    | 0.938548658 | 2.17E-05 |
| mNFa | ENSMUSG00000066438 | Plekhd1  | 0.938129195 | 2.60E-05 |
| mNFa | ENSMUSG00000051855 | Mest     | 0.937080537 | 2.81E-05 |
| mNFa | ENSMUSG00000029359 | Tesc     | 0.937080537 | 2.78E-05 |
| mNFa | ENSMUSG00000025090 | Ccdc172  | 0.936451342 | 2.06E-05 |
| mNFa | ENSMUSG00000021696 | Elovl7   | 0.935192953 | 3.30E-05 |
| mNFa | ENSMUSG00000057134 | Ado      | 0.934983221 | 3.35E-05 |



|      |                    |               |             |             |
|------|--------------------|---------------|-------------|-------------|
| mNFa | ENSMUSG00000032028 | Nxpe2         | 0.934249161 | 2.69E-05    |
| mNFa | ENSMUSG00000034765 | Dusp5         | 0.932676174 | 4.01E-05    |
| mNFa | ENSMUSG00000040420 | Cdh18         | 0.93204698  | 4.22E-05    |
| mNFa | ENSMUSG00000028773 | Fabp3         | 0.931208054 | 4.53E-05    |
| mNFa | ENSMUSG00000071648 | Rom1          | 0.928691275 | 5.51E-05    |
| mNFa | ENSMUSG00000045104 | NA            | 0.927432886 | 5.95E-05    |
| mNFa | ENSMUSG00000019966 | Kitl          | 0.925545302 | 5.99E-05    |
| mNFa | ENSMUSG00000055044 | Pdlim1        | 0.925020973 | 6.78E-05    |
| mNFa | ENSMUSG00000044749 | Abca6         | 0.924391779 | 7.70E-05    |
| mNFa | ENSMUSG00000042757 | Tmem108       | 0.924286913 | 5.35E-05    |
| mNFa | ENSMUSG00000059895 | Ptp4a3        | 0.924077181 | 7.94E-05    |
| mNFa | ENSMUSG00000059146 | Ntrk3         | 0.922713926 | 6.30E-05    |
| mNFa | ENSMUSG00000027489 | Necab3        | 0.922189597 | 9.17E-05    |
| mNFa | ENSMUSG00000026547 | Tagln2        | 0.920302013 | 0.000102772 |
| mNFa | ENSMUSG00000020553 | Pctp          | 0.919672819 | 0.000111866 |
| mNFa | ENSMUSG00000038949 | Cnst          | 0.917365772 | 0.000134048 |
| mNFa | ENSMUSG00000058966 | Fam57b        | 0.916736577 | 0.000140679 |
| mNFa | ENSMUSG00000047976 | Kcna1         | 0.91642198  | 0.000137801 |
| mNFa | ENSMUSG00000090546 | Cdr1          | 0.915058725 | 0.000159862 |
| mNFa | ENSMUSG00000073910 | Mob3b         | 0.914953859 | 0.000143716 |
| mNFa | ENSMUSG00000074505 | Fat3          | 0.914639262 | 0.000133416 |
| mNFa | ENSMUSG00000028228 | Cpne3         | 0.914639262 | 0.000165108 |
| mNFa | ENSMUSG00000033615 | Cplx1         | 0.913800336 | 0.000176002 |
| mNFa | ENSMUSG00000054763 | Defb42        | 0.913590604 | 0.000171419 |
| mNFa | ENSMUSG00000020151 | Ptprr         | 0.912122483 | 0.000199653 |
| mNFa | ENSMUSG00000026344 | Lypd1         | 0.911912752 | 0.000154928 |
| mNFa | ENSMUSG00000037706 | Cd81          | 0.91170302  | 0.000204906 |
| mNFa | ENSMUSG00000021991 | Cacna2d3      | 0.911493289 | 0.000203517 |
| mNFa | ENSMUSG00000027562 | Car2          | 0.909920302 | 0.000232182 |
| mNFa | ENSMUSG00000059412 | Fxyd2         | 0.908557047 | 0.000262089 |
| mNFa | ENSMUSG00000017978 | Cadps2        | 0.907403523 | 0.000277859 |
| mNFa | ENSMUSG00000019194 | Scn1b         | 0.907298658 | 0.000288036 |
| mNFa | ENSMUSG00000091636 | A330050F15Rik | 0.904572148 | 0.000216246 |
| mNFa | ENSMUSG00000033377 | Palmd         | 0.901845638 | 0.000430135 |
| mNFa | ENSMUSG00000055069 | Rab39         | 0.901426174 | 0.000446509 |
| mNFa | ENSMUSG00000027827 | Kcnab1        | 0.901426174 | 0.00044601  |
| mNFa | ENSMUSG00000025511 | Tspan4        | 0.901216443 | 0.000453472 |
| mNFa | ENSMUSG00000020623 | Map2k6        | 0.901216443 | 0.000413879 |
| mNFa | ENSMUSG00000045967 | Gpr158        | 0.900587248 | 0.000473874 |
| mNFa | ENSMUSG00000018604 | Tbx3          | 0.900272651 | 0.000472566 |
| mNFa | ENSMUSG00000042388 | Dlgap3        | 0.899748322 | 0.000502556 |
| mNFa | ENSMUSG00000033595 | Lgi3          | 0.899433725 | 0.000456444 |
| mNFa | ENSMUSG00000029544 | Cabp1         | 0.899119128 | 0.000527702 |

|      |                    |               |                    |             |
|------|--------------------|---------------|--------------------|-------------|
| mNFa | ENSMUSG00000082160 | NA            | 0.898909396        | 0.000487604 |
| mNFa | ENSMUSG00000026347 | Tmem163       | 0.897860738        | 0.000532103 |
| mNFa | ENSMUSG00000023033 | Scn8a         | 0.897860738        | 0.000578426 |
| mNFa | ENSMUSG00000019853 | Hebp2         | 0.897651007        | 0.000588531 |
| mNFa | ENSMUSG00000026678 | Rgs5          | 0.897231544        | 0.000496671 |
| mNFa | ENSMUSG00000004748 | Mtfp1         | 0.896602349        | 0.000630427 |
| mNFa | ENSMUSG00000045991 | Onecut2       | 0.895973154        | 0.000605577 |
| mNFa | ENSMUSG00000038205 | Prkab2        | 0.895763423        | 0.000675859 |
| mNFa | ENSMUSG00000047786 | Lix1          | 0.895553691        | 0.000686273 |
| mNFa | ENSMUSG00000021565 | Slc6a19       | 0.895134228        | 0.000678836 |
| mNFa | ENSMUSG00000100851 | NA            | 0.893980705        | 0.000550501 |
| mNFa | ENSMUSG00000030268 | Bcat1         | 0.893666107        | 0.000756357 |
| mNFa | ENSMUSG00000055254 | Ntrk2         | 0.893036913        | 0.000820179 |
| mNFa | ENSMUSG00000042734 | Ttc9          | 0.891778523        | 0.000902735 |
| mNFa | ENSMUSG00000055022 | Cntn1         | 0.890729866        | 0.000958543 |
| mNFa | ENSMUSG00000053889 | NA            | 0.890520134        | 0.000959212 |
| mNFa | ENSMUSG00000020486 |               | Sep-04 0.890310403 | 0.001000168 |
| mNFa | ENSMUSG00000027895 | Kcnc4         | 0.889156879        | 0.001076365 |
| mNFa | ENSMUSG00000021798 | Ldb3          | 0.888527685        | 0.001133129 |
| mNFa | ENSMUSG00000045287 | Rtn4r1        | 0.887793624        | 0.001190362 |
| mNFa | ENSMUSG00000085438 | 1700020I14Rik | 0.887793624        | 0.001201115 |
| mNFa | ENSMUSG00000032135 | Mcam          | 0.886535235        | 0.001288603 |
| mNFa | ENSMUSG00000047606 | Ankrd34c      | 0.886220638        | 0.001033136 |
| mNFa | ENSMUSG00000004633 | Chn2          | 0.884752517        | 0.001429867 |
| mNFa | ENSMUSG00000106379 | Lhfp13        | 0.883389262        | 0.001643909 |
| mNFa | ENSMUSG00000035232 | Pdk3          | 0.882969799        | 0.001693196 |
| mNFa | ENSMUSG00000029108 | Pcdh7         | 0.882969799        | 0.001490598 |
| mNFa | ENSMUSG00000034810 | Scn7a         | 0.882340604        | 0.00177075  |
| mNFa | ENSMUSG00000022212 | Cpne6         | 0.880662752        | 0.001987949 |
| mNFa | ENSMUSG00000002980 | Bcam          | 0.880033557        | 0.002081255 |
| mNFa | ENSMUSG00000058624 | Gda           | 0.87971896         | 0.001924901 |
| mNFa | ENSMUSG00000031688 | Pou4f2        | 0.879509228        | 0.002006419 |
| mNFa | ENSMUSG00000021062 | Rab15         | 0.877307047        | 0.002519892 |
| mNFa | ENSMUSG00000045333 | Zfp423        | 0.876782718        | 0.002559224 |
| mNFa | ENSMUSG00000006589 | Aprt          | 0.876677852        | 0.002614782 |
| mNFa | ENSMUSG00000036766 | Dner          | 0.876468121        | 0.002669971 |
| mNFa | ENSMUSG00000061013 | Mkx           | 0.876468121        | 0.00237891  |
| mNFa | ENSMUSG00000001666 | Ddt           | 0.876258389        | 0.00270969  |
| mNFa | ENSMUSG00000035513 | Ntng2         | 0.875104866        | 0.002374455 |
| mNFa | ENSMUSG00000032724 | Abtb2         | 0.874580537        | 0.003040533 |
| mNFa | ENSMUSG00000038718 | Pbx3          | 0.874370805        | 0.00271784  |
| mNFa | ENSMUSG00000015944 | Gatsl2        | 0.873427013        | 0.003289612 |
| mNFa | ENSMUSG00000037747 | Phyhl1        | 0.873112416        | 0.003362929 |

|      |                    |               |             |             |
|------|--------------------|---------------|-------------|-------------|
| mNFa | ENSMUSG00000047766 | Lrrc49        | 0.87227349  | 0.003563192 |
| mNFa | ENSMUSG00000042195 | Slc35f2       | 0.871434564 | 0.00371315  |
| mNFa | ENSMUSG00000021701 | Plk2          | 0.871224832 | 0.003825857 |
| mNFa | ENSMUSG00000032011 | Thy1          | 0.871015101 | 0.003833715 |
| mNFa | ENSMUSG00000008822 | Acyp1         | 0.870385906 | 0.00405085  |
| mNFa | ENSMUSG00000052914 | Cyp2j6        | 0.870176174 | 0.004107889 |
| mNFa | ENSMUSG00000030616 | Sytl2         | 0.869232383 | 0.004168677 |
| mNFa | ENSMUSG00000024112 | Cacna1h       | 0.869127517 | 0.004399831 |
| mNFa | ENSMUSG00000091498 | NA            | 0.869127517 | 0.004413613 |
| mNFa | ENSMUSG00000041482 | Piezo2        | 0.868708054 | 0.004425451 |
| mNFa | ENSMUSG00000060257 | Scrt2         | 0.867030201 | 0.005077562 |
| mNFa | ENSMUSG00000053199 | Arhgap20      | 0.866086409 | 0.005422652 |
| mNFa | ENSMUSG00000044024 | Rell2         | 0.865876678 | 0.005504931 |
| mNFa | ENSMUSG00000029608 | Rph3a         | 0.864932886 | 0.005844084 |
| mNFa | ENSMUSG00000047963 | Stbd1         | 0.864723154 | 0.005948455 |
| mNFa | ENSMUSG00000028701 | Lurap1        | 0.864408557 | 0.005733591 |
| mNFa | ENSMUSG00000020684 | Rasl10b       | 0.864198826 | 0.005690956 |
| mNFa | ENSMUSG00000025810 | Nrp1          | 0.863674497 | 0.006252799 |
| mNFa | ENSMUSG00000010080 | Epn3          | 0.863674497 | 0.005904846 |
| mNFa | ENSMUSG00000057315 | Arhgap24      | 0.863359899 | 0.006514212 |
| mNFa | ENSMUSG00000042873 | Lhfpl4        | 0.862416107 | 0.006951852 |
| mNFa | ENSMUSG00000048899 | Rimk1a        | 0.86136745  | 0.007456235 |
| mNFa | ENSMUSG00000038174 | Fam126b       | 0.860213926 | 0.008048361 |
| mNFa | ENSMUSG00000004558 | Ndrp2         | 0.859479866 | 0.008452599 |
| mNFa | ENSMUSG00000000552 | Zfp385a       | 0.859479866 | 0.007875159 |
| mNFa | ENSMUSG00000019478 | Rab4a         | 0.859060403 | 0.008688586 |
| mNFa | ENSMUSG00000002233 | Rhoc          | 0.859060403 | 0.008688586 |
| mNFa | ENSMUSG00000035407 | Kank4         | 0.85864094  | 0.008186862 |
| mNFa | ENSMUSG00000038264 | Sema7a        | 0.85864094  | 0.00739916  |
| mNFa | ENSMUSG00000048489 | 8430408G22Rik | 0.858011745 | 0.007116327 |
| mNFa | ENSMUSG00000079056 | Kcnp3         | 0.857592282 | 0.009573502 |
| mNFa | ENSMUSG00000028982 | Slc25a33      | 0.857592282 | 0.009573502 |
| mNFa | ENSMUSG00000035653 | Lrnf5         | 0.857592282 | 0.00956255  |
| mNFa | ENSMUSG00000035246 | Pcyt1b        | 0.85738255  | 0.00970509  |
| mNFa | ENSMUSG00000033208 | S100b         | 0.85738255  | 0.009703477 |
| mNFa | ENSMUSG00000049922 | Slc35c1       | 0.856753356 | 0.010105639 |
| mNFa | ENSMUSG00000036395 | Glb1l2        | 0.856438758 | 0.008004194 |
| mNFa | ENSMUSG00000033427 | Upb1          | 0.856229027 | 0.010430084 |
| mNFa | ENSMUSG00000079499 | 6530402F18Rik | 0.855704698 | 0.008168449 |
| mNFa | ENSMUSG00000075334 | Rprm          | 0.854865772 | 0.011404904 |
| mNFa | ENSMUSG00000047986 | Palm3         | 0.854760906 | 0.011046836 |
| mNFa | ENSMUSG00000106055 | NA            | 0.854236577 | 0.011924246 |
| mNFa | ENSMUSG00000032252 | Glce          | 0.852768456 | 0.013115161 |

|      |                    |               |             |             |
|------|--------------------|---------------|-------------|-------------|
| mNFa | ENSMUSG00000034224 | Slc38a8       | 0.852558725 | 0.010262496 |
| mNFa | ENSMUSG00000063694 | Cycs          | 0.85192953  | 0.013855122 |
| mNFa | ENSMUSG00000061878 | Sphk1         | 0.851510067 | 0.014143476 |
| mNFa | ENSMUSG00000021373 | Cap2          | 0.85119547  | 0.011388494 |
| mNFa | ENSMUSG00000101693 | Gm19461       | 0.850880872 | 0.014798271 |
| mNFa | ENSMUSG00000032452 | Clstn2        | 0.849832215 | 0.01501389  |
| mNFa | ENSMUSG00000043670 | Diras1        | 0.848573826 | 0.017195636 |
| mNFa | ENSMUSG00000004031 | Brinp2        | 0.84846896  | 0.017220818 |
| mNFa | ENSMUSG00000028631 | Kcnq4         | 0.848364094 | 0.013928036 |
| mNFa | ENSMUSG00000020297 | Nsg2          | 0.847944631 | 0.017888164 |
| mNFa | ENSMUSG00000033781 | Asb13         | 0.847105705 | 0.018818576 |
| mNFa | ENSMUSG00000060487 | Samd5         | 0.84647651  | 0.017603035 |
| mNFa | ENSMUSG00000049775 | Tmsb4x        | 0.846266779 | 0.019914647 |
| mNFa | ENSMUSG00000068220 | Lgals1        | 0.846266779 | 0.019914647 |
| mNFa | ENSMUSG00000024798 | Htr7          | 0.846266779 | 0.015345793 |
| mNFa | ENSMUSG00000036206 | Sh3bp4        | 0.846266779 | 0.019888404 |
| mNFa | ENSMUSG00000033676 | Gabrb3        | 0.845427852 | 0.021009666 |
| mNFa | ENSMUSG00000022844 | Pdia5         | 0.845113255 | 0.021351211 |
| mNFa | ENSMUSG00000049422 | Chchd10       | 0.845008389 | 0.021575855 |
| mNFa | ENSMUSG00000030270 | Cpne9         | 0.844169463 | 0.020819469 |
| mNFa | ENSMUSG00000028710 | Atpaf1        | 0.843330537 | 0.024022186 |
| mNFa | ENSMUSG00000064329 | Scn1a         | 0.842806208 | 0.023244535 |
| mNFa | ENSMUSG00000060402 | Chst8         | 0.842491611 | 0.025298531 |
| mNFa | ENSMUSG00000042182 | Bend6         | 0.841862416 | 0.026348295 |
| mNFa | ENSMUSG00000071719 | Tmem28        | 0.84175755  | 0.024142888 |
| mNFa | ENSMUSG00000026442 | Nfasc         | 0.841652685 | 0.026680863 |
| mNFa | ENSMUSG00000087651 | 1500009L16Rik | 0.841442953 | 0.026886434 |
| mNFa | ENSMUSG00000020836 | Coro6         | 0.841128356 | 0.026369835 |
| mNFa | ENSMUSG00000029001 | Fbxo44        | 0.840604027 | 0.028524631 |
| mNFa | ENSMUSG00000062760 | 1810041L15Rik | 0.839555369 | 0.030448657 |
| mNFa | ENSMUSG00000040164 | Kcns1         | 0.839450503 | 0.025239626 |
| mNFa | ENSMUSG00000039835 | Nhsl1         | 0.839240772 | 0.030662685 |
| mNFa | ENSMUSG00000031824 | 6430548M08Rik | 0.83903104  | 0.031451932 |
| mNFa | ENSMUSG00000043673 | Kcns3         | 0.83829698  | 0.032908045 |
| mNFa | ENSMUSG00000062054 | lah1          | 0.838087248 | 0.033342857 |
| mNFa | ENSMUSG00000027350 | Chgb          | 0.837667785 | 0.034222686 |
| mNFa | ENSMUSG00000049556 | Lingo1        | 0.837038591 | 0.035290928 |
| mNFa | ENSMUSG00000032523 | Hhatl         | 0.836199664 | 0.034142862 |
| mNFa | ENSMUSG00000075605 | 2300005B03Rik | 0.835360738 | 0.031875669 |
| mNFa | ENSMUSG00000021396 | Nxn12         | 0.835360738 | 0.034548901 |
| mNFa | ENSMUSG00000020396 | Nefh          | 0.835151007 | 0.040018553 |
| mNFa | ENSMUSG00000031231 | Cox7b         | 0.835151007 | 0.040018553 |
| mNFa | ENSMUSG00000000631 | Myo18a        | 0.833473154 | 0.044400838 |

|      |                    |         |             |             |
|------|--------------------|---------|-------------|-------------|
| mNFa | ENSMUSG00000042659 | Arrdc4  | 0.832319631 | 0.047638095 |
| mNFa | ENSMUSG00000023169 | Slc38a1 | 0.831795302 | 0.047720215 |

6  
7  
8
